# Supplementary material for: Expression dynamics of repetitive DNA in early human embryonic development
Source: PubMed Central journal article supplement (PMC6545021; doi:10.1186/s12864-019-5803-1), 2019-05-31
Supplement: 12864_2019_5803_MOESM1_ESM.pdf [file 12864_2019_5803_MOESM1_ESM.pdf]

# Expression dynamics of repetitive DNA in early human embryonic development

Cihangir Yandim, Gokhan Karakulah\*

\*Corresponding Author

gokhan.karakulah@ibg.edu.tr

## SUPPLEMENTARY FIGURES

Figure S1

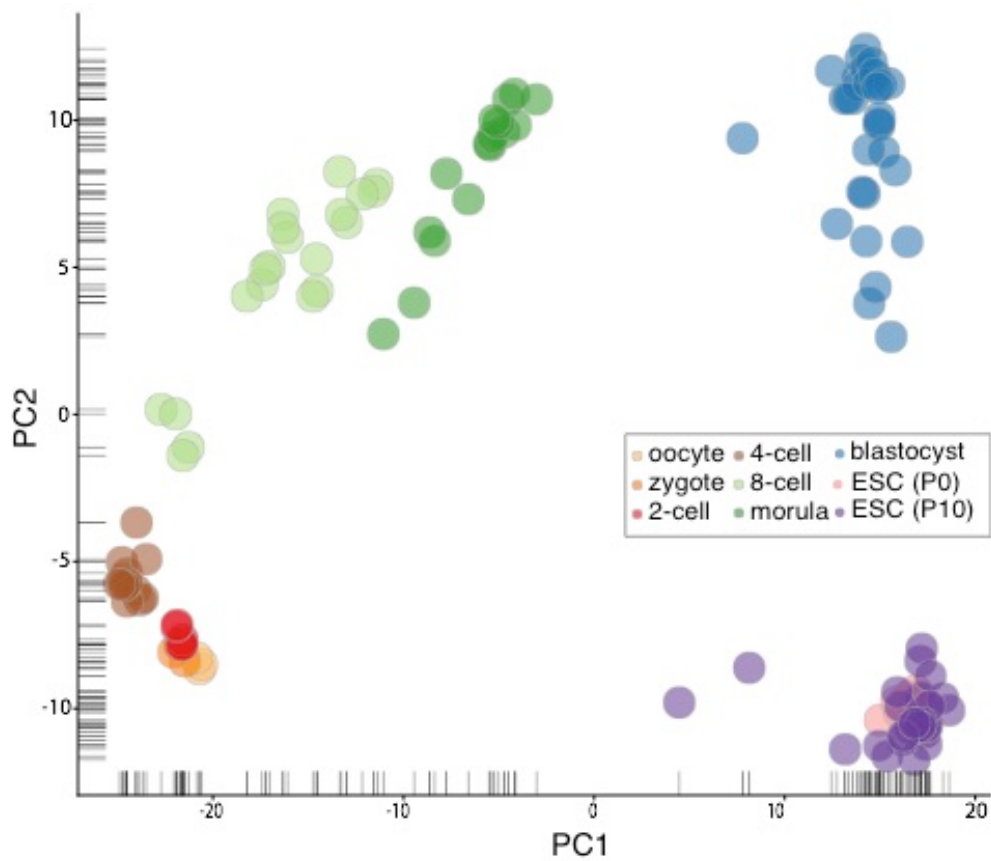

**Figure S1.** Principal component (PCA) analysis of gene expression. Each circle represents a single cell in the corresponding developmental stage.

**Figure S2**

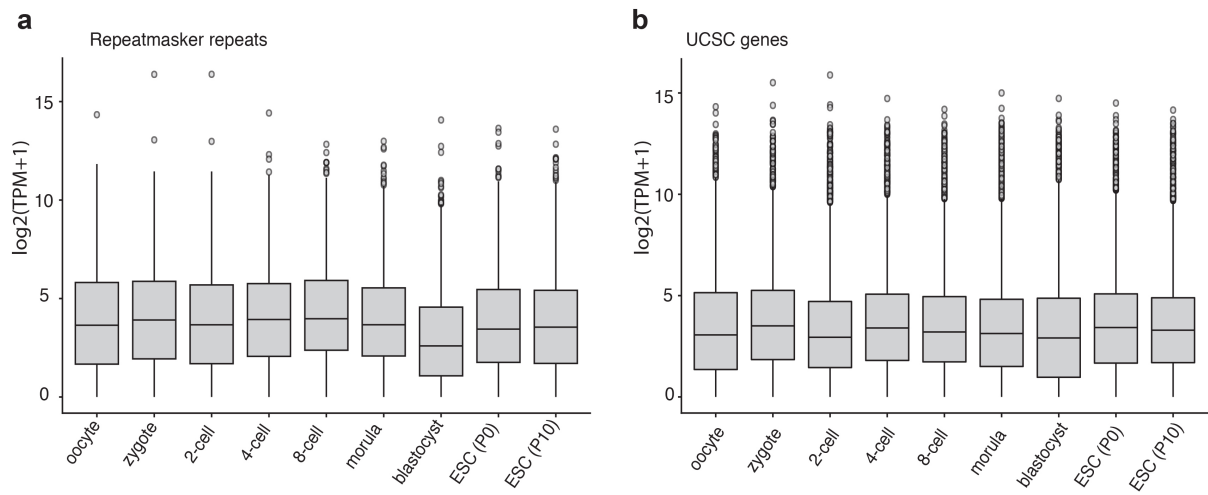

**Figure S2.** Box-plot representations of repeat and gene expressions obtained from single cells across stages of human pre-implantation and different passages (P0 and P10) of embryonic stem cells (ESC). **a** Expression levels of 1116 repeat elements. **b** Expression levels of UCSC annotated genes.

**Figure S3**

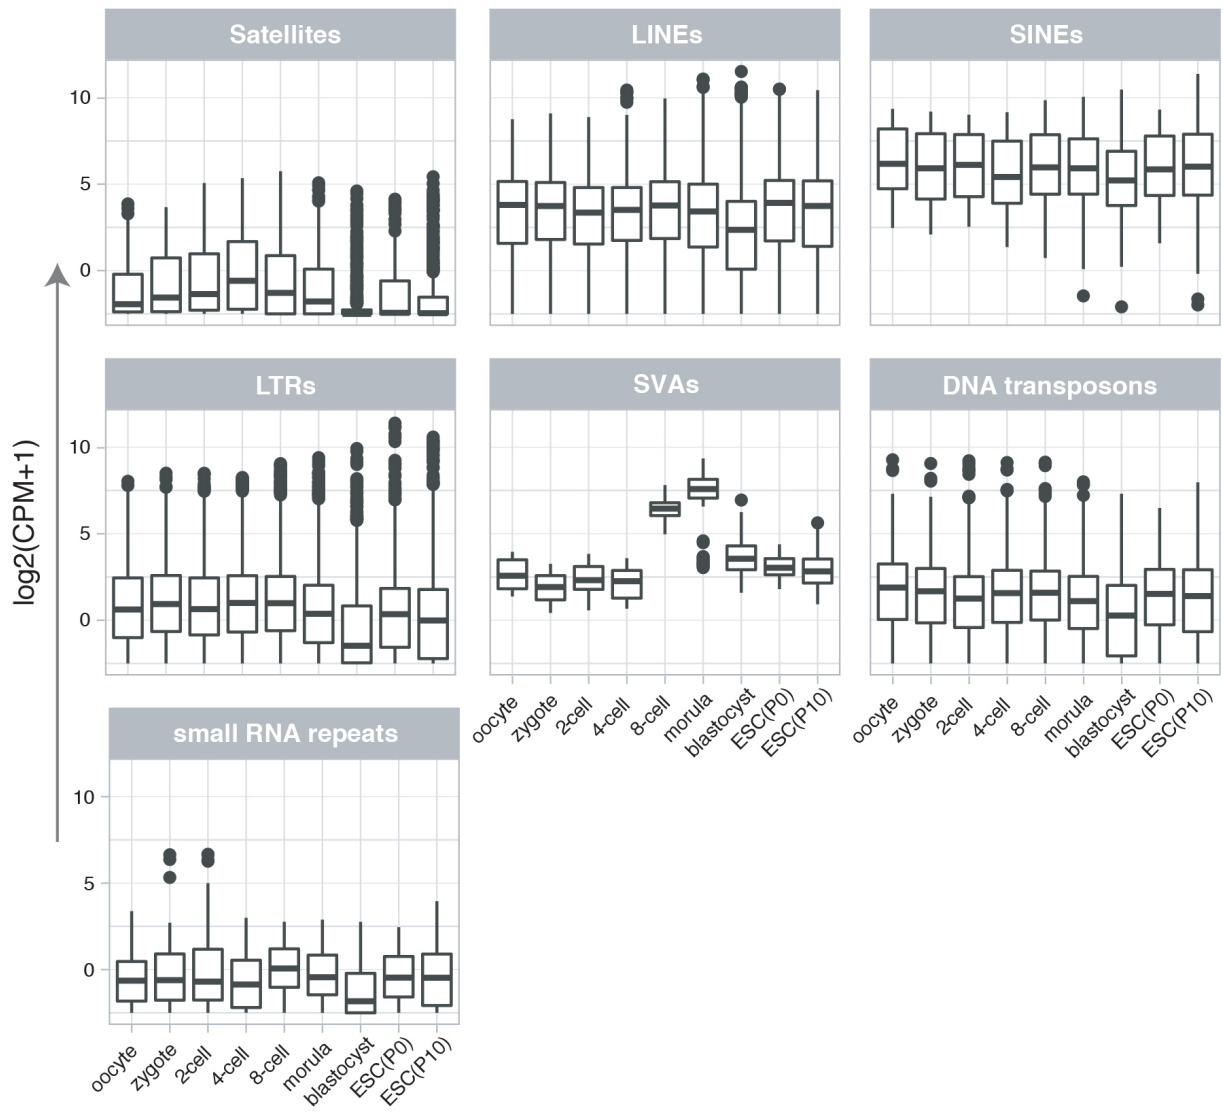

**Figure S3.** Box-plot representations of expression levels of all members of each major repeat class across stages of human pre-implantation and different passages (P0 and P10) of embryonic stem cells (ESC).

**Figure S4**

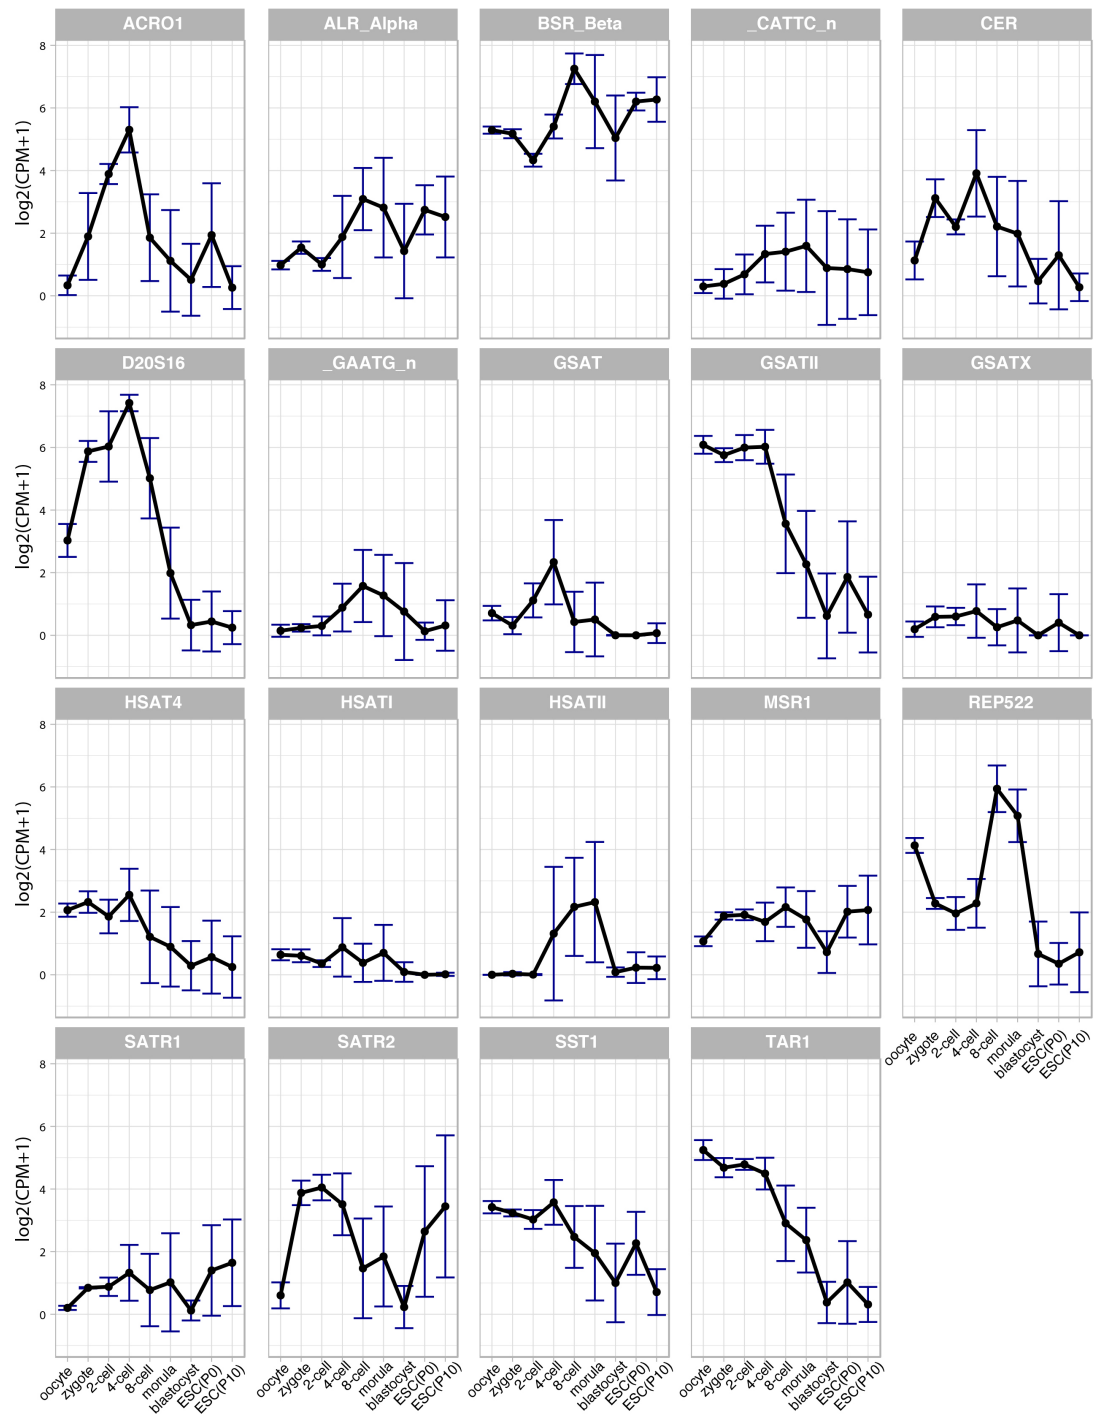

**Figure S4.** Line plots representing the expression levels of each member of satellite repeat family. Error bars indicate standard errors of the mean. Repeats that are expressed below the 1-CPM threshold are not shown.



**Figure S5**

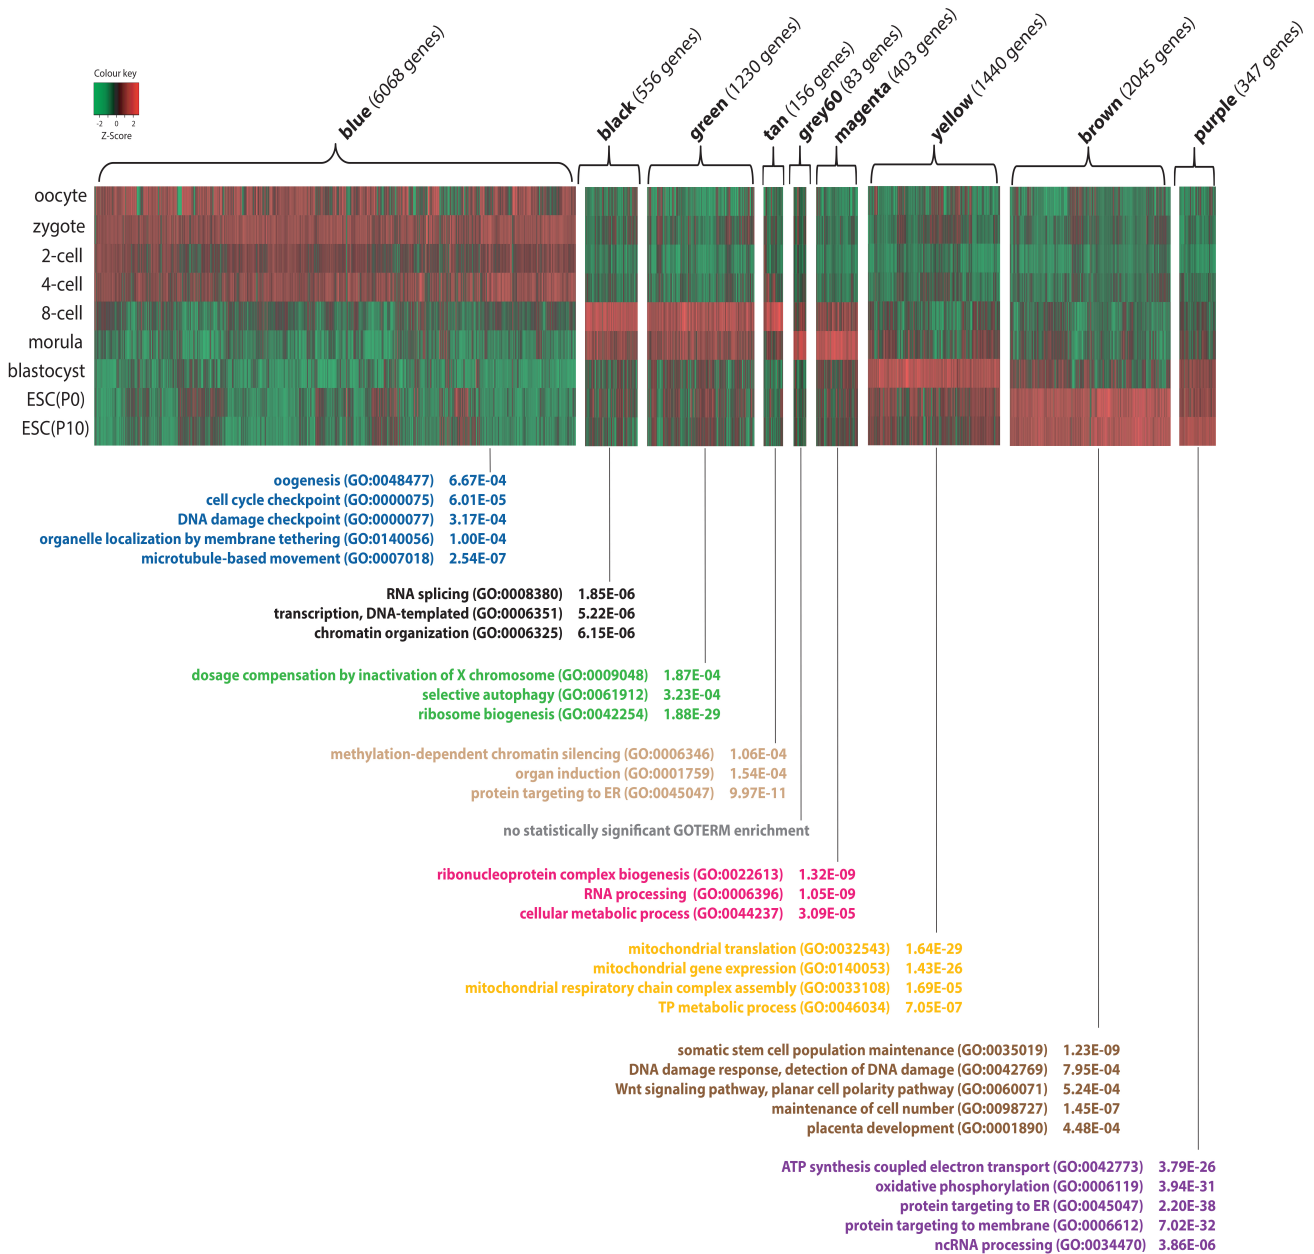

**Figure S5.** Heat-map representing the expression levels of genes in stage specific modules as analysed with weighted gene co-expression network analysis (WGCNA). GO terms enriched in these modules and their corresponding p-values are listed next to them.

**Figure S6**

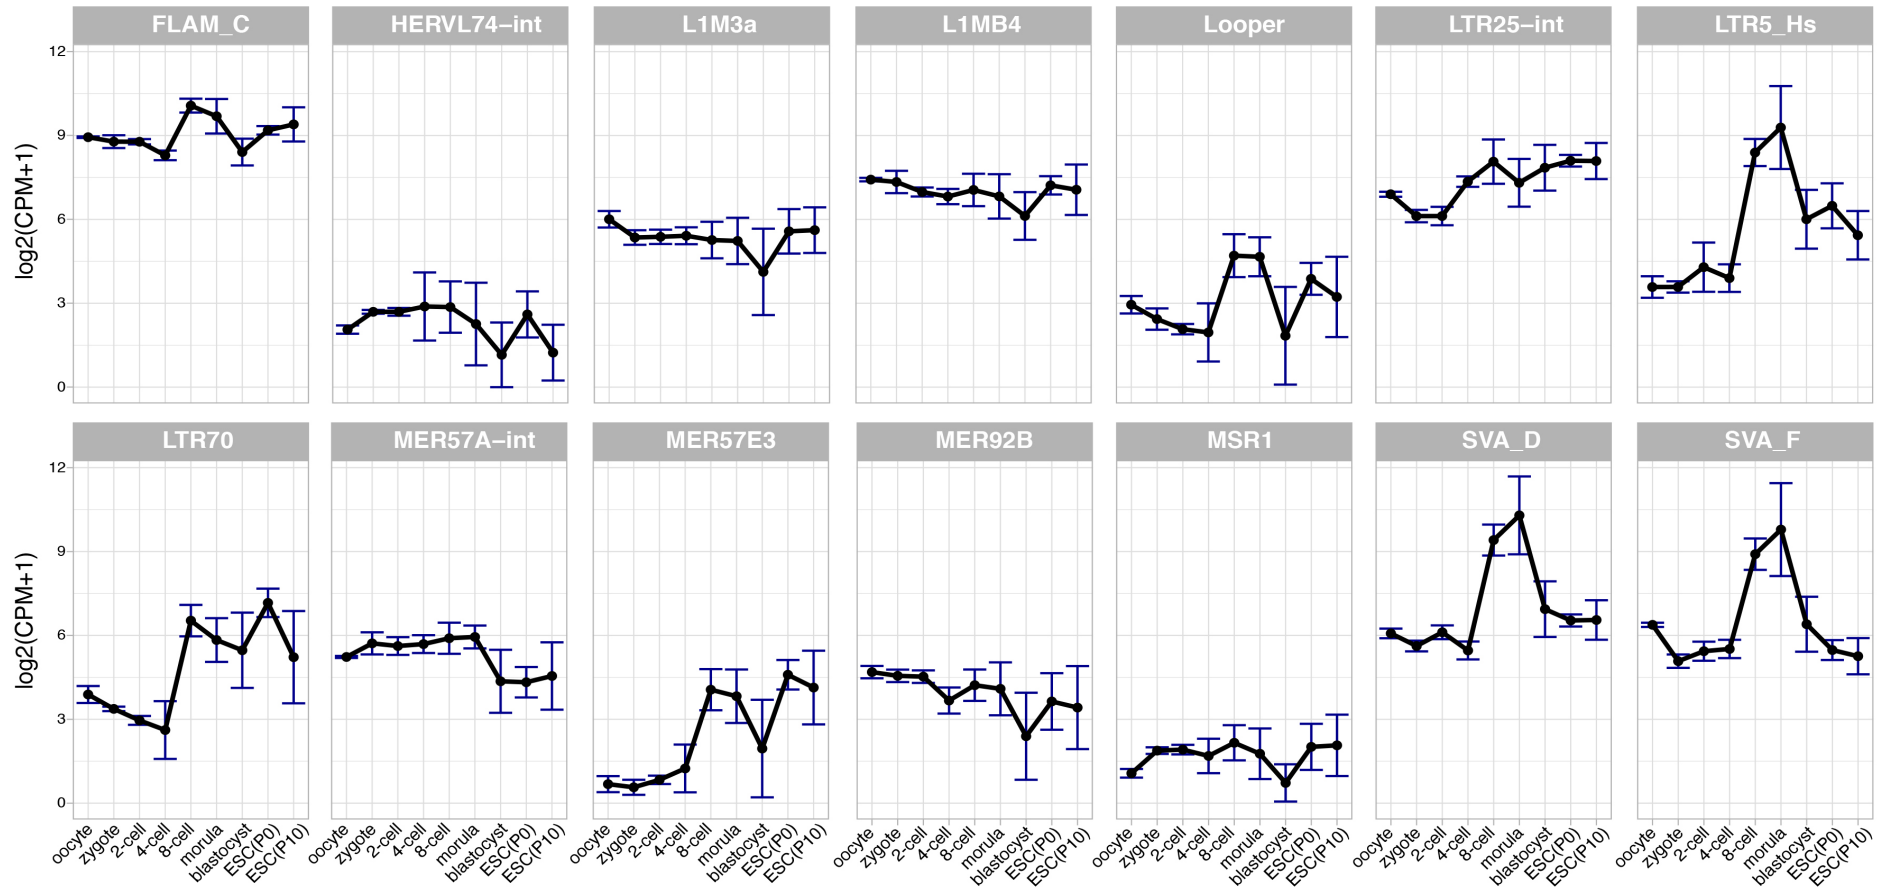

**Figure S6.** Line plots representing mean expression levels of repeats that exhibit higher than 3.5 fold enrichment in any WGCNA module. In addition to 11 repeats which are above the 3.5 threshold; FLAM\_C, SVA\_D and SVA\_F levels are also shown. Error bars indicate the standard error of the mean.

**Figure S7**

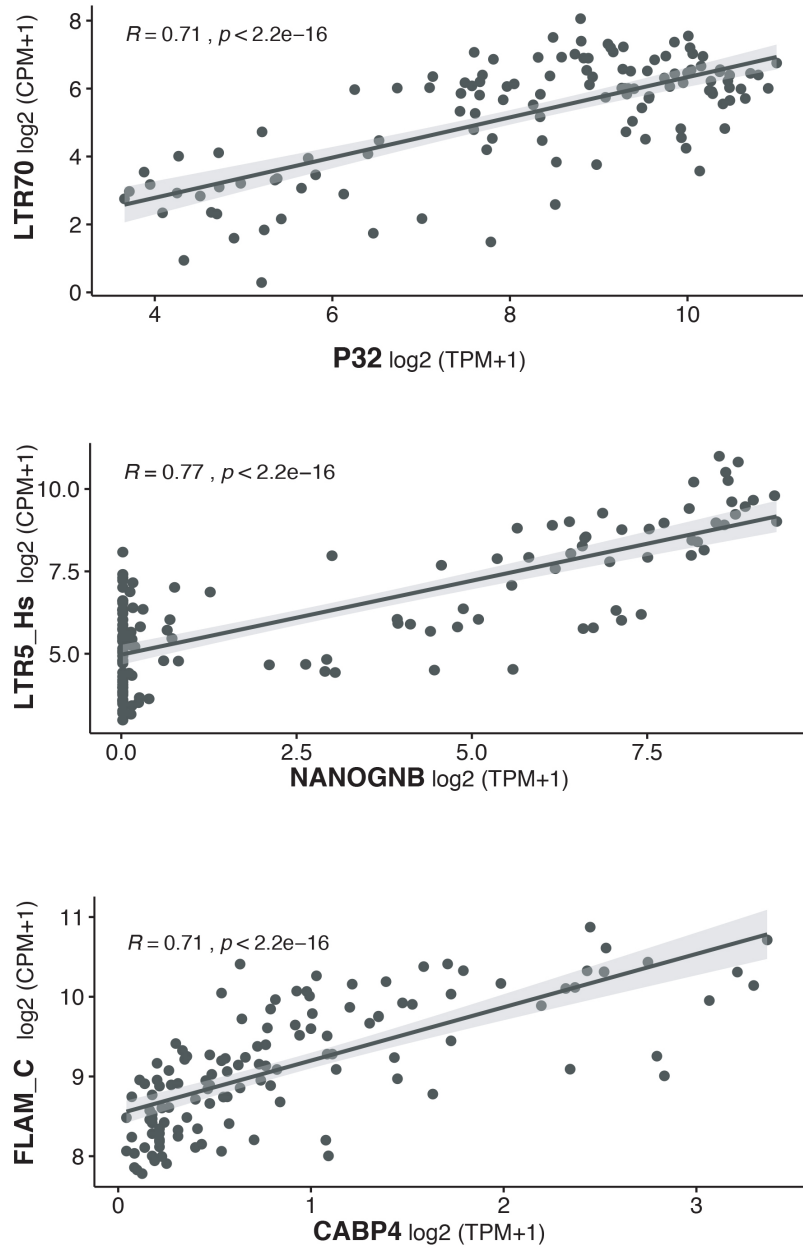

**Figure S7.** Scatter plots representing the correlation between developmentally vital genes and the relevant repeats.

**Figure S8**

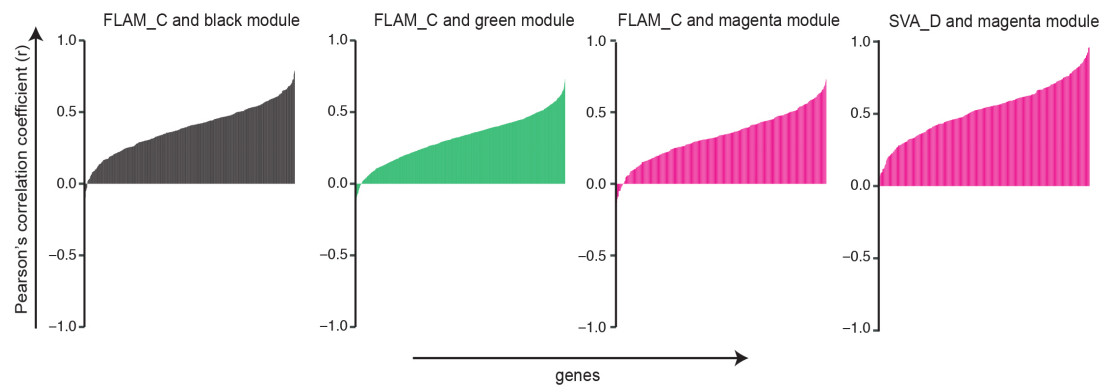

**Figure S8.** Additional module-repeat correlations for repeats that are below the 3.5 enrichment threshold.

**Figure S9**

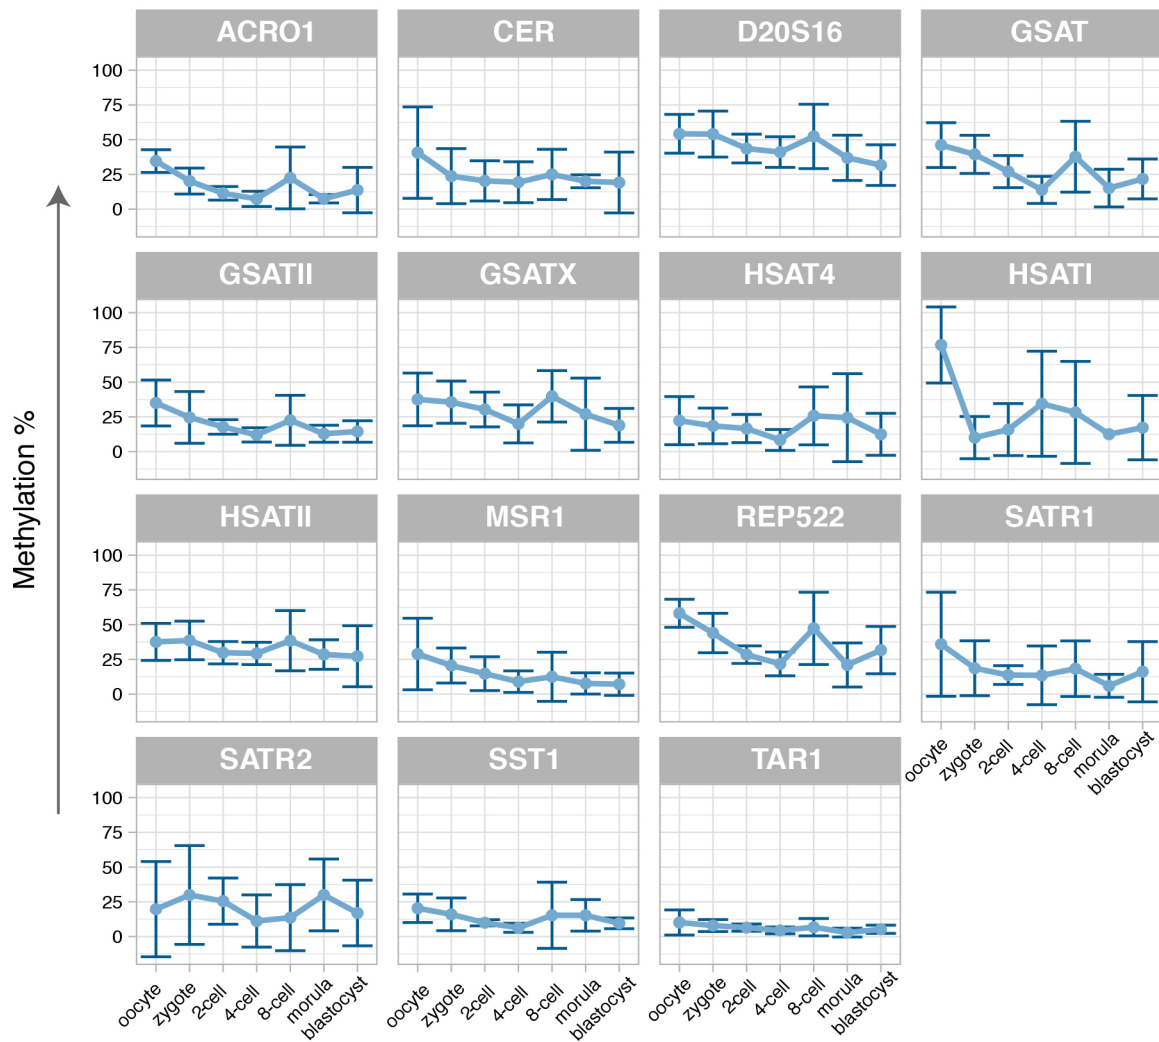

**Figure S9.** Line plots representing mean DNA methylation levels of different members of satellite repeat family. Error bars indicate the standard error of the mean.
