# Supplementary material for: Expression dynamics of repetitive DNA in early human embryonic development
Source: BMC Genomics. 2019 May 31;20:439. doi: 10.1186/s12864-019-5803-1 (PMC6545021; doi:10.1186/s12864-019-5803-1)
Supplement: Supplementary file 4 — Table S3. Fraction counts of repeats by RepEnrich2 (XLSX 782 kb) [file 12864_2019_5803_MOESM4_ESM.xlsx]

## Sheet: RepEnrich2-FractionCounts-Repea
Table S3. Fraction counts of repeats by RepEnrich2
	Oocyte#1-C1	Oocyte#1-C2	Oocyte#1-C3	Zygote#1-C1	Zygote#1-C2	Zygote#1-C3	2-cell#1-C1	2-cell#1-C2	2-cell#2-C1	2-cell#2-C2	2-cell#3-C1	2-cell#3-C2	4-cellembryo#1-Cell#1	4-cellembryo#1-Cell#2	4-cellembryo#1-Cell#3	4-cellembryo#1-Cell#4	4-cellembryo#2-Cell#1	4-cellembryo#2-Cell#2	4-cellembryo#2-Cell#3	4-cellembryo#2-Cell#4	4-cellembryo#3-Cell#1	4-cellembryo#3-Cell#2	4-cellembryo#3-Cell#3	4-cellembryo#3-Cell#4	8-cellembryo#1-Cell#1	8-cellembryo#1-Cell#2	8-cellembryo#1-Cell#3	8-cellembryo#1-Cell#4	8-cellembryo#2-Cell#1	8-cellembryo#2-Cell#2	8-cellembryo#2-Cell#3	8-cellembryo#2-Cell#4	8-cellembryo#2-Cell#5	8-cellembryo#2-Cell#6	8-cellembryo#2-Cell#7	8-cellembryo#2-Cell#8	8-cellembryo#3-Cell#1	8-cellembryo#3-Cell#2	8-cellembryo#3-Cell#3	8-cellembryo#3-Cell#4	8-cellembryo#3-Cell#5	8-cellembryo#3-Cell#6	8-cellembryo#3-Cell#7	8-cellembryo#3-Cell#8	Morula#1-Cell#1	Morula#1-Cell#2	Morula#1-Cell#3	Morula#1-Cell#4	Morula#1-Cell#5
MER11B	226	184	181	383	849	560	922	1103	755	966	450	591	396	454	159	92	814	144	596	787	362	403	262	462	914	753	778	797	514	643	366	1136	2896	1631	1163	1512	1626	1996	572	1395	1851	1298	874	1211	2302	590	1501	768	774
MER44B	1536	1392	1285	760	662	810	893	878	666	737	1066	1303	1245	1054	808	1061	2085	1405	1271	1335	2008	1697	1313	1581	723	571	479	650	302	439	371	536	2282	1576	868	1039	1058	1416	773	1256	1336	1473	1080	1563	558	241	670	543	217
MSTA1	239	265	228	254	192	208	331	355	326	354	291	363	97	183	112	240	195	231	259	260	266	240	100	107	117	209	154	101	101	142	85	102	692	388	135	265	350	297	290	123	259	147	173	212	89	43	196	129	177
MLT1E1-int	0	0	1	0	0	0	7	4	1	6	0	0	0	0	0	0	0	36	5	0	0	0	12	0	0	0	79	0	0	0	33	20	143	0	49	0	0	1	0	0	0	0	0	28	362	1	191	0	1
MER96B	676	588	534	674	611	741	573	705	725	790	785	1037	1062	1645	964	711	1425	1495	864	1599	1827	1691	860	1047	178	446	364	388	314	305	265	291	506	673	334	496	555	830	435	983	697	115	362	534	671	147	927	487	119
MLT1E2-int	8	18	17	8	10	13	15	5	12	16	13	7	0	0	0	0	63	1	25	15	47	6	26	92	30	3	57	17	18	22	30	129	507	150	41	86	125	18	42	226	17	0	1	0	150	10	5	23	33
UCON29	251	313	127	211	217	221	160	192	154	158	105	183	150	170	268	54	301	364	207	134	243	42	194	237	133	118	34	86	14	73	73	28	54	115	22	115	155	238	198	7	66	379	87	141	547	70	3	127	60
Zaphod2	119	120	132	146	128	168	161	147	191	190	110	120	238	49	308	405	335	214	135	12	148	128	133	188	66	23	28	120	41	7	26	2	217	239	146	153	38	85	12	326	151	329	114	20	17	13	148	64	24
MER41E	53	24	29	71	41	57	86	81	137	95	46	77	45	236	40	23	355	50	48	257	143	289	30	446	75	113	29	8	127	0	93	49	701	143	163	389	131	94	606	54	350	24	2	0	421	1	244	71	57
MER41D	82	69	62	145	90	148	88	129	111	157	101	127	1	9	10	1	359	45	110	392	99	270	166	130	30	52	73	7	90	102	7	63	185	76	94	236	299	73	67	105	141	251	0	374	99	155	89	106	30
MER41G	30	31	16	82	43	59	67	67	70	62	91	118	103	156	14	113	188	46	65	151	68	3	55	4	28	53	1	26	1	8	3	68	175	2	131	221	59	9	7	96	53	140	83	64	9	43	3	148	3
MLT2B3	543	452	468	1513	953	915	2751	2815	1906	2467	1725	2201	1547	1626	628	950	1737	1558	1555	2068	1632	1668	1072	1469	1996	1703	1566	1278	1191	1012	1288	1138	2736	2129	1130	2473	5622	4658	3549	3792	4374	3857	2912	5108	1570	630	3645	1802	1219
LTR82B	117	115	114	160	145	185	126	75	114	137	91	124	188	60	153	172	20	235	327	881	282	175	206	332	181	342	72	393	131	440	71	351	385	321	24	348	354	123	300	105	136	182	24	69	5	11	496	85	49
MER41C	290	245	209	221	217	300	230	275	313	313	251	301	396	311	182	178	1055	451	471	597	418	324	292	470	357	702	196	509	365	285	315	286	1219	641	203	440	364	92	996	422	603	1084	187	535	265	119	484	203	302
LTR82A	166	266	151	345	230	295	168	201	172	174	240	358	752	590	232	446	726	585	298	496	627	712	380	706	251	163	230	277	107	296	210	531	568	312	158	257	445	171	307	218	94	253	88	561	63	158	278	559	67
L1M4a2	2167	1410	1373	1131	748	2666	522	713	483	545	580	640	1507	2648	1119	1533	2127	1205	1183	1627	1653	1582	1043	1244	1445	1685	667	1015	477	437	461	867	2616	852	1092	1238	2406	2380	1642	1423	2065	2276	1932	2380	1097	569	2834	646	537
L1M4a1	10905	7039	6351	5816	3926	13607	2584	3410	1753	1599	2403	2894	8847	13436	5011	5613	7672	6126	4148	6674	7333	8129	4185	6140	1112	1517	992	1799	1275	801	1164	1257	3496	2069	1780	2201	3515	4286	1197	3232	3238	960	1641	2058	2706	543	6347	926	610
LTR39	2047	1633	1598	1001	1002	1045	1553	1495	1179	1744	1253	1607	1891	1160	751	1287	2768	1488	1601	1681	1529	1816	1175	2363	434	403	568	756	411	652	358	723	726	543	361	633	858	1091	712	427	762	603	341	662	892	329	282	946	628
MER96	135	156	174	266	229	253	272	352	259	362	278	377	454	404	554	401	554	294	381	643	372	143	334	380	257	165	59	111	164	75	160	71	584	362	210	361	393	548	312	460	566	458	135	865	606	91	208	201	121
MER20B	5497	5351	3330	5753	4996	2950	13367	14205	11977	14138	7661	8900	9023	6346	4198	4801	6769	6836	5895	7103	6131	6623	4252	6557	1551	1322	1537	1552	935	970	800	1887	4928	3419	1613	2878	4481	3309	3011	3463	3245	4256	2339	2784	2017	419	3189	1127	445
MER83B-int	215	143	119	155	91	145	109	142	139	202	104	131	787	42	16	0	160	105	148	238	195	190	106	89	117	94	20	2	3	137	70	139	440	123	64	139	169	107	21	3	441	74	225	189	85	1	318	94	1
MLT1E3	981	953	844	1366	1241	1490	2308	2599	1767	2220	1834	2305	3867	3720	1903	1471	3666	2657	2893	3271	3071	3679	1929	3727	544	724	717	542	502	856	565	677	5902	3122	2904	4831	1569	577	2699	1780	2991	1774	1809	2349	940	246	7322	987	547
LTR35A	21	20	12	33	18	20	33	28	37	71	45	66	0	45	1	326	293	108	56	9	64	34	25	9	13	15	3	2	39	1	4	4	10	0	3	66	32	483	25	33	4	22	0	9	0	1	3	5	0
LTR35B	39	37	38	42	31	24	43	83	47	92	35	59	144	0	1	0	45	17	85	82	68	16	61	83	28	2	18	11	0	6	5	0	0	23	8	18	367	3	0	50	90	199	0	0	153	0	0	57	0
MER95	28	58	59	93	72	35	48	41	68	63	83	82	0	1	0	13	3	128	56	108	73	6	48	49	54	9	14	33	20	61	14	64	115	65	64	101	229	252	167	45	229	314	202	358	53	41	131	119	2
MER44A	2001	2266	1406	1525	1541	1722	1573	1834	1714	1807	1325	1598	2501	2414	1057	2337	2372	3289	3108	3738	2863	2697	2218	3016	708	657	490	1280	522	819	706	961	1362	1429	706	912	1492	1749	1063	1686	1397	1156	699	1713	1485	842	796	1394	1626
MSTB2	575	295	399	430	408	504	774	913	657	931	639	707	391	398	165	265	923	882	481	535	563	683	553	424	268	329	311	360	506	171	215	393	731	747	447	644	842	616	294	727	884	906	483	1166	333	117	1383	112	105
CER	61	11	23	315	116	195	156	135	85	156	143	151	666	4	102	580	1194	1135	778	1232	821	1320	665	454	260	28	22	7	19	5	33	2	493	816	209	144	141	246	69	870	427	23	9	121	1349	67	433	174	3
Charlie15b	2683	3534	2694	2544	1880	2105	2407	2405	2827	2920	2660	2922	3162	2882	1117	2285	2858	2661	2657	4497	2339	2882	2029	3261	1164	1070	626	1886	612	643	493	1381	2293	3537	1277	2056	3295	3343	3408	3538	3784	1829	1287	4542	3258	785	1024	1781	1313
LTR52-int	20	29	20	18	11	13	22	21	8	14	20	14	3	0	4	36	85	92	122	144	124	35	50	50	19	5	0	1	0	22	0	0	99	82	6	73	2	6	0	126	10	0	0	0	8	10	59	29	0
Charlie15a	1012	944	782	1209	1118	1423	1107	1137	935	1241	1081	1218	1961	2162	624	1170	1708	1315	1331	944	1649	1898	1040	1761	1238	1394	746	1531	599	724	541	979	1965	1614	942	1035	2678	3264	2048	2196	2243	2489	1317	2304	2972	734	1108	1289	1225
LTR85c	445	423	349	497	245	408	471	506	528	547	522	651	442	1471	509	406	802	744	639	1110	706	779	576	811	0	129	75	16	81	64	84	61	356	173	239	273	414	307	394	343	376	11	210	318	360	54	30	154	75
LTR85b	233	227	175	182	160	188	259	279	193	213	129	201	298	388	378	636	247	348	468	566	477	590	331	367	13	46	23	134	2	51	78	110	345	152	137	223	585	242	488	385	193	61	121	203	82	6	174	63	119
LTR85a	158	202	161	281	229	273	290	301	226	308	255	324	631	365	210	81	420	275	534	665	454	642	283	481	71	68	57	80	5	32	9	43	345	326	257	335	405	323	22	215	30	231	133	272	344	4	1313	60	63
MER97b	1366	771	751	566	620	611	745	901	559	663	903	889	3283	3170	1276	757	1533	2408	874	1370	1685	1220	1029	2592	160	503	301	141	248	497	130	322	1463	1505	914	785	1876	2344	408	878	695	2624	1138	877	143	50	20	23	73
Tigger12c	232	262	200	349	221	242	434	344	295	389	357	391	365	689	279	240	706	510	582	447	373	701	244	354	201	165	121	331	86	202	202	328	195	356	103	250	518	694	368	400	279	674	233	243	311	152	219	211	159
AluYh9	2090	1882	1635	1875	1405	1611	3313	3215	2826	3358	2696	3495	1787	1668	1183	1173	2011	1416	1754	1753	1934	2007	1370	1821	1917	1790	1406	1568	1551	1525	1354	1320	2188	1641	1482	1692	4006	3625	2771	2729	2809	3104	2266	2985	2106	905	1841	2074	1272
LTR66	41	21	44	81	49	93	78	98	65	111	57	72	240	27	101	54	341	125	188	12	157	44	168	81	135	169	162	342	190	135	193	139	373	773	305	213	962	938	364	824	828	1297	697	727	283	88	69	381	345
LTR103_Mam	166	113	121	225	161	158	196	217	177	268	234	213	701	156	116	124	108	420	239	436	330	408	267	299	71	51	31	89	63	45	40	33	158	198	89	210	232	134	2	45	45	286	306	39	151	8	685	41	95
LTR61	13	12	17	27	34	15	26	26	9	24	31	19	112	186	0	1	1	47	60	25	91	105	79	3	37	173	208	96	80	100	62	165	143	299	282	193	451	23	956	201	404	1473	158	469	579	185	147	509	178
tRNA-Leu-TTA_m_	1268	2454	1898	15814	13550	21005	6718	8453	14938	11740	14145	18368	22061	19695	17641	12147	66845	56981	52905	64491	43232	35149	26502	44937	13825	8727	10543	15819	13393	17896	14015	11389	9070	9397	8045	7322	38014	29725	23684	29260	26925	29114	17737	23178	38984	28621	48461	27513	33699
FordPrefect_a	11	12	20	10	22	15	10	10	14	7	0	22	8	0	2	91	124	45	21	0	34	34	53	26	0	3	15	1	8	38	0	1	28	26	47	98	24	120	0	9	191	1	13	1	124	2	0	12	0
LTR60	13	6	1	2	1	0	3	1	7	2	2	4	2	52	1	4	74	2	30	0	0	2	0	4	0	1	0	0	0	0	0	0	0	0	0	5	0	1	0	0	159	17	0	0	0	0	1	0	0
LTR60B	2903	2312	1774	4303	819	3339	1887	2340	3031	3613	2874	3297	1158	1718	1533	917	4634	5068	3839	4603	3917	4631	2836	3937	21	242	258	394	73	122	214	143	388	521	269	507	893	520	335	674	990	1658	470	871	887	109	670	57	14
HERVKC4-int	22	13	2	5	14	12	4	4	18	18	2	17	20	15	15	5	16	52	49	62	83	80	3	94	4	30	11	16	3	2	9	5	36	12	122	109	7	15	22	141	46	3	8	3	201	12	165	6	2
Chap1_Mam	206	222	198	447	367	630	763	781	810	762	974	980	999	923	364	434	1288	1343	716	1877	1342	1000	1159	1075	265	310	395	403	327	339	117	415	852	1434	678	637	1036	1675	1710	1037	1491	1318	855	718	703	164	593	310	320
LTR3	84	79	50	178	202	279	448	428	335	687	306	465	230	739	647	260	1264	736	428	925	879	517	589	752	704	816	598	2005	2159	1209	1227	1241	620	278	178	520	2071	2102	1505	1780	2174	2897	1312	2271	3503	1504	65	3146	1488
X5B_LINE	48	47	56	40	67	83	67	79	116	155	47	77	154	14	84	89	226	74	95	114	78	111	62	54	36	35	34	131	50	32	58	25	133	42	52	63	72	18	27	66	18	3	13	43	44	58	76	2	70
AluSg7	18164	15506	11906	10721	10243	14347	15631	15693	13865	17346	16980	21591	13081	11970	8941	9754	14245	11257	12075	13008	14140	14614	9796	12745	9882	9297	6621	9505	8711	8102	6935	7262	14356	10043	8800	9536	20995	18678	14973	14086	15872	21158	12014	17138	12501	5440	9101	11360	7612
LTR7	3315	3598	3928	7094	11226	9352	18290	19286	16834	23655	6868	8794	6440	5554	4226	3617	7437	5581	6418	6043	8355	7898	5987	9327	2520	3499	4070	3705	3406	3531	3489	4731	9905	8599	6745	7485	9470	6907	8327	6995	8946	9512	5893	6514	12821	3613	1347	9519	5522
LTR4	2	1	1	7	7	5	6	8	25	13	10	16	0	0	69	0	1	148	52	0	12	0	0	10	18	188	48	36	74	47	22	61	142	6	19	89	391	171	87	177	170	59	26	718	216	47	3	229	2
LTR5	145	124	141	103	100	109	229	252	218	248	112	102	533	193	157	123	592	339	545	245	310	311	228	337	4406	3281	3477	3371	2193	2561	2871	3932	2104	2800	1635	1710	8018	5716	6705	11945	4818	4712	5699	7505	13864	7190	571	19232	10356
LTR8	1948	2054	1914	4035	3603	3590	6804	7233	5166	7866	4862	6392	3199	3556	3124	1631	3860	2907	2700	2679	3172	3218	1818	3110	3074	2152	2637	2745	3000	3009	1930	3306	5957	3687	2426	3839	5332	5988	3386	4179	3346	4219	2627	4911	5772	2181	2113	2880	2114
LTR9	349	317	355	516	544	566	641	770	730	898	802	886	569	1068	780	442	1349	814	1069	1124	1065	1339	507	973	743	1013	501	1033	451	1096	346	890	1192	1157	550	1173	2782	2880	2248	2520	2648	1126	691	1696	1397	716	979	859	645
X9_LINE	166	131	117	87	65	120	75	89	106	148	114	144	148	56	99	116	263	197	212	284	257	243	136	227	254	269	131	227	357	211	228	284	29	47	26	61	386	394	273	512	463	503	290	346	129	63	164	69	57
MER57C2	96	135	99	173	135	165	224	263	218	212	158	189	177	90	126	93	163	101	270	490	172	148	92	115	48	234	18	22	172	1	57	84	186	59	42	65	117	38	377	80	63	16	29	0	106	114	96	27	13
HERVH48-int	182	82	128	114	282	329	130	176	184	385	298	366	83	0	94	1	776	264	458	1129	226	1232	355	889	293	257	453	450	123	246	111	246	606	560	463	549	865	1079	1304	631	1735	960	277	171	232	41	733	58	246
MER57C1	35	40	69	39	41	71	44	54	42	37	60	63	1	27	179	1	274	192	77	84	53	194	64	154	31	91	15	64	104	37	58	12	79	12	98	207	167	372	146	9	90	5	11	11	1	35	138	58	2
LTR13A	1022	670	675	656	667	625	1063	1214	856	1305	971	1085	1359	2513	778	1088	5854	3956	3754	4468	4621	3942	2965	4115	1260	1337	581	979	366	920	540	616	1520	1269	665	1575	2898	2620	1645	2164	1494	2024	1661	1987	1296	359	298	1137	952
MSTB1-int	20	14	19	69	44	56	84	72	58	49	71	53	45	97	850	79	38	48	54	47	29	27	23	47	87	189	196	35	45	135	109	121	92	8	22	13	432	25	114	84	646	1192	15	192	14	24	33	79	27
tRNA-Asn-AAT	0	0	0	0	0	0	0	0	0	0	0	0	0	0	0	0	0	0	0	0	0	0	0	0	0	0	0	0	0	0	0	0	0	0	0	0	0	0	0	0	0	0	0	1	0	0	0	0	0
MER115	467	439	423	656	533	881	659	745	717	890	614	920	1442	604	592	426	1840	1206	1197	1472	1602	1441	1210	2174	128	321	107	347	142	209	63	83	1009	814	535	601	597	593	865	855	735	745	826	772	313	92	740	294	143
Tigger13a	1127	1208	812	1559	1040	1241	1622	1648	1541	1957	1123	1217	1933	1964	1133	1038	3344	2292	1626	3648	1836	1986	1693	1976	650	593	654	946	313	289	505	465	2923	2563	1121	1970	2807	1324	1124	1742	1483	1570	918	1817	558	381	1816	548	584
MER117	1177	1207	1074	1122	900	1302	1097	1296	1049	1303	1112	1516	1757	2555	1206	1686	3346	2203	2189	2147	1900	2604	1572	2148	869	999	626	712	663	502	542	1221	2044	1066	878	887	1226	999	1621	1917	1310	945	909	850	771	299	1145	985	519
MER110	112	118	99	172	160	147	255	228	206	156	293	328	236	607	5560	294	431	341	471	390	241	167	177	464	443	263	904	143	129	583	162	269	351	350	146	185	198	71	134	128	190	17	45	136	46	51	287	323	162
MER112	2678	2705	1292	4985	2152	3692	4148	4424	4192	5303	3694	6063	4933	4570	2839	3174	4156	3286	2963	2876	3096	3542	2261	2862	1254	1426	1124	1477	1007	1116	1073	1666	4051	4146	1882	2553	5197	5491	2592	3273	3979	2823	1836	4215	2472	2427	6644	2448	1291
L1PB1	6014	3875	3625	3318	2782	4525	5382	6322	3195	4693	4323	5451	11133	5909	6770	3458	8477	6226	6321	6922	6694	8826	5255	7184	7249	6050	5573	9627	5084	6805	4275	7582	11542	9161	4619	9241	17010	14883	12535	17640	14103	9358	8399	12673	13924	10680	26682	24081	19097
MER74A	588	649	631	889	942	930	1224	1255	1194	1501	981	1355	1397	1206	856	1431	1991	1427	1113	1472	1908	1648	1114	1708	326	328	328	343	95	230	346	138	998	583	402	403	575	284	1328	255	521	361	444	1048	188	186	940	216	256
HERVK11D-int	6	16	13	30	16	17	42	26	16	14	16	30	0	455	6	0	0	31	75	1	40	268	69	165	0	35	13	0	4	0	45	98	0	123	152	147	0	14	121	0	0	86	15	332	247	1	0	0	0
LTR13_	7	28	25	38	43	40	52	55	65	58	61	54	100	42	7	52	196	27	122	197	142	105	125	119	169	259	95	275	70	124	85	212	267	230	187	150	311	1083	673	519	387	541	238	427	128	118	170	123	115
MER119	535	513	399	386	318	364	332	392	348	429	386	472	666	367	430	211	843	598	555	384	460	1192	374	876	398	497	168	541	232	644	348	320	705	779	415	464	589	650	457	631	1117	752	279	1238	187	318	604	337	197
MER5C1	2385	2040	1889	1218	1284	1010	1560	1444	1051	1385	1634	2429	1187	788	472	823	993	846	686	1019	819	991	616	945	181	93	96	115	46	163	52	93	396	319	229	236	543	455	206	662	282	113	367	319	6	62	63	71	45
PABL_A	197	138	131	248	239	285	322	269	301	310	215	282	698	533	254	150	491	177	320	317	373	319	217	399	343	198	102	411	609	262	215	263	562	462	325	526	675	621	915	827	576	2276	212	649	639	103	341	193	118
LTR38	29	54	33	49	50	37	55	74	35	52	52	78	0	0	138	59	104	311	56	47	128	69	68	200	16	78	26	4	24	40	0	0	69	113	101	74	214	274	0	25	1	38	113	0	305	2	154	0	5
L1PB3	207	199	215	608	633	644	552	818	590	678	503	607	788	1267	612	572	630	1378	746	749	970	1087	470	836	703	754	806	655	250	262	509	661	4050	2015	1295	1681	1495	1748	491	691	1092	628	921	1443	1588	454	4552	565	191
MamGypLTR3	621	550	591	374	411	552	434	485	336	419	460	506	1296	830	394	645	1118	1280	505	883	1098	837	598	1085	42	161	122	344	139	168	30	120	989	382	312	357	134	343	691	123	169	133	108	351	215	32	103	170	91
MER65-int	579	636	433	342	390	497	430	518	587	707	501	614	1039	457	179	317	1013	1163	1286	1747	1888	1411	862	1409	321	559	398	507	433	233	182	573	705	456	562	511	1602	1692	1326	617	1985	1958	546	3052	1979	1103	1398	1081	1223
MLT1K	10445	9636	7999	9747	7827	10451	11424	12279	11080	13994	10655	13215	20664	15378	11016	9996	17430	13510	14894	16492	15306	16803	12377	16452	3591	5516	3221	4704	2939	3236	2502	3598	14839	12113	8404	9204	11732	10563	8135	8975	9356	11479	7040	7728	9191	2333	10379	5039	3465
LTR32	1067	1127	851	2267	2025	2176	3404	3657	4143	4841	2671	3335	2162	2762	1564	1267	1709	2221	1744	1830	2233	2023	1484	1739	353	341	176	261	181	156	178	411	735	788	588	822	1620	249	363	1286	755	715	847	733	311	97	476	155	71
LTR33	6543	5909	5319	6794	5544	5850	9829	10168	8909	10937	7360	8759	10580	8341	5455	5343	10195	10177	8349	11822	11897	12362	7283	11953	1703	2072	1739	1613	834	2060	958	1581	5486	4155	2837	3950	6065	5950	3374	4113	4355	4105	2649	2804	1831	713	7056	1529	945
L1MA10	1269	1340	1118	1480	1238	1168	1562	1603	1611	1880	1535	1838	1647	1687	1514	1628	1985	2685	1909	2081	2063	2484	1194	2001	934	1037	766	1384	550	864	757	1255	2840	1777	1024	1472	3831	4848	6962	4040	7317	4779	2762	8948	1017	592	2650	701	761
LTR31	141	98	78	254	185	296	294	263	321	369	241	294	37	252	228	489	566	354	383	421	541	233	200	405	160	114	70	78	26	71	31	171	562	71	145	107	254	586	163	374	265	21	202	123	18	68	584	109	194
AluYg6	3407	3105	2653	2827	2158	2548	4978	4896	4375	5172	4146	5341	2998	2596	2020	1875	3287	2479	2941	2940	3344	3495	2337	3138	3268	3028	2316	2819	2588	2642	2316	2304	3752	2833	2252	2557	6325	5608	4537	4460	4540	5360	3631	4904	3723	1683	3268	3725	2268
LTR34	23	15	24	47	56	40	51	74	67	83	34	47	0	0	191	0	62	119	135	158	183	262	37	145	20	42	23	31	11	15	36	98	204	257	211	71	369	380	183	0	307	4	64	258	379	88	2	47	19
LTR35	106	104	101	422	98	90	602	619	762	763	63	106	302	447	57	191	320	543	336	503	624	756	576	701	181	73	210	74	46	161	198	219	351	205	43	132	417	558	43	471	509	7	211	108	2	12	15	14	0
MLT2B2	1084	877	716	1043	878	1333	1334	1270	1227	1560	1502	1595	1938	2587	1080	918	1436	1769	1226	1505	1452	1944	1037	1843	471	267	329	171	231	190	140	308	2024	1137	1149	1361	643	1520	1521	1001	1386	247	1017	466	826	275	1246	468	252
HERVK13-int	305	397	318	429	295	326	509	455	470	547	445	479	1143	748	1041	605	2509	2106	1631	2037	1567	1860	1876	1913	1400	1392	878	1320	507	759	407	1127	1464	1428	644	779	2484	2371	1247	1441	1546	1407	578	1044	1100	714	330	874	487
L1P1	362	420	466	478	352	433	797	911	712	714	533	703	2341	2385	1098	1451	6583	1029	3844	1365	1242	2032	1141	1788	2017	1015	1238	1136	578	813	660	937	5166	2356	1459	2540	1933	1737	784	1359	950	1595	745	749	3275	661	13210	1866	653
L1P3	443	459	524	543	577	590	534	663	558	609	491	554	1249	1386	708	786	2188	1793	1534	1127	827	898	544	1360	1753	897	878	886	623	569	487	834	4518	1780	1152	2392	2290	1405	3820	1073	1087	631	579	1869	1605	359	10297	974	558
L1P2	305	379	411	565	412	421	794	962	708	643	662	793	1190	2102	5516	838	2822	1332	1980	1515	1079	1652	906	1270	2328	1483	2417	1735	1058	1946	1176	1546	3523	2307	1372	2398	2185	1375	808	1228	946	1093	623	1147	3665	1184	10809	2477	1249
L1P5	176	203	80	587	270	164	251	255	164	200	427	358	371	260	281	190	284	255	146	475	127	235	101	218	46	54	85	7	31	57	25	144	153	131	121	33	177	308	39	194	307	143	151	244	221	32	186	64	32
L1P4	16595	18162	12539	9422	3801	5952	26811	28459	24899	31082	9459	12073	10526	9899	8076	5979	6863	3928	3958	4931	6819	10248	5708	8570	1984	2800	1882	1965	1698	1675	2321	2649	6312	4521	3475	3627	2671	3381	1647	1771	2010	2161	770	1222	1271	796	4072	819	641
LTR108b_Mam	0	0	0	1	0	0	0	6	1	0	0	3	0	240	5	0	0	0	0	0	17	0	0	2	0	0	0	0	0	0	0	0	0	0	43	0	0	0	0	0	0	0	0	0	25	0	0	0	0
LTR21A	668	452	304	435	217	193	356	395	287	449	206	260	363	1399	45	113	439	486	581	847	579	550	520	509	621	431	1661	1055	549	737	697	958	797	765	375	358	707	459	342	1263	953	90	255	417	1654	701	283	2401	791
tRNA-Arg-AGA	1	0	1	2	4	1	1	2	0	1	1	1	0	0	3	0	0	10	8	0	5	0	0	0	32	4	0	0	0	0	0	0	2	17	0	2	0	0	17	9	17	1	0	7	0	0	1	3	0
LTR21C	0	3	0	1	2	2	2	4	3	3	3	1	2	0	0	0	10	0	2	12	2	0	2	2	5	7	0	0	1	1	47	36	1	0	0	0	0	0	109	0	0	10	4	0	0	1	18	8	0
LTR21B	25	25	17	114	108	140	130	121	100	193	115	78	6	0	6	27	54	83	24	169	28	16	25	82	30	59	2	0	57	61	45	43	19	0	49	20	1	1	247	23	4	1	43	130	0	37	72	39	2
LTR86B1	12	52	22	47	73	123	67	93	109	56	68	99	120	87	29	303	76	130	162	399	108	134	111	200	11	45	39	102	46	0	1	56	311	337	61	220	257	233	26	30	66	76	2	206	11	54	136	24	12
LTR86B2	16	27	18	17	23	25	18	17	8	28	32	12	0	0	42	179	96	71	31	3	39	51	69	28	0	20	0	75	37	0	0	0	27	124	23	27	83	22	135	89	0	0	8	46	25	9	3	0	16
tRNA-Gly-GGA	2	5	4	11	2	7	11	2	16	12	2	3	74	0	4	0	8	1	9	0	4	20	24	0	13	5	0	2	15	0	25	23	86	29	19	12	0	1	0	3	48	22	37	0	13	0	20	0	0
L1PB	763	615	387	633	657	929	864	990	888	1054	735	935	1709	749	1381	836	969	573	720	683	868	1054	647	889	847	576	606	554	540	518	489	575	1294	1053	609	1031	1695	771	639	869	401	1288	512	1051	1372	371	2880	840	274
ERV3-16A3_LTR	287	301	257	288	308	385	431	490	310	411	245	229	239	516	560	57	480	629	481	525	519	542	325	498	59	143	50	56	9	95	43	121	429	179	332	160	499	644	417	604	427	437	211	361	303	0	274	52	73
LTR18A	30	34	39	90	64	67	115	112	98	112	71	114	40	67	72	14	196	28	190	85	138	261	65	159	1	19	30	3	29	0	0	0	4	50	10	39	3	37	114	7	126	499	5	1	0	0	0	3	19
LTR18C	11	20	30	77	131	98	123	94	102	122	90	108	82	116	172	183	52	291	17	365	111	101	188	115	0	33	36	0	3	0	0	0	58	51	111	7	0	1	171	53	15	57	1	130	1	1	0	0	3
LTR18B	331	238	210	388	370	411	384	362	526	666	510	562	532	168	434	382	291	382	331	517	573	272	371	586	94	125	71	201	3	118	25	87	441	212	117	146	193	349	0	210	320	1100	330	361	448	24	175	3	14
ERV24_Prim-int	43	44	32	85	60	57	74	69	40	49	84	96	0	187	2	19	118	62	237	54	309	139	169	141	132	187	119	114	112	40	42	71	48	89	53	48	450	142	2	9	295	79	96	260	6	81	118	170	18
MER70C	23	29	17	36	16	22	20	44	17	17	20	26	283	285	5	0	130	1	95	25	8	0	58	8	26	72	120	66	24	14	16	24	379	76	147	418	20	127	14	277	135	29	228	18	7	0	344	30	22
LTR3B	250	235	234	990	957	1199	1234	1361	1147	1474	867	1054	1241	1123	886	654	901	587	565	674	1025	1202	693	893	56	117	48	125	106	137	116	162	436	166	165	474	609	1097	213	458	269	267	228	84	225	89	20	227	156
LTR3A	19	35	28	96	90	103	112	139	95	103	86	135	354	300	91	227	220	271	217	472	345	586	195	345	202	91	167	173	142	187	129	357	59	106	210	234	340	260	259	339	550	220	660	172	21	120	40	243	141
MSTA	3959	2967	2943	6186	5691	6050	9765	10058	6991	9315	7062	8862	8639	6581	4801	4414	7569	6562	6507	6944	7523	8361	5272	6765	2917	3383	2142	2448	2143	2266	1757	3150	10687	6025	4998	6021	7297	5881	7523	7245	6079	9931	5863	7794	5891	2067	11373	4383	3114
MSTB	1132	1465	1504	1278	1447	1634	2110	2369	1872	2120	1684	2222	3427	3109	1407	1320	2474	2323	2361	2522	2637	2138	1413	2684	1518	1104	1052	1403	968	1251	882	2115	5207	2772	2172	2784	3661	2725	2700	3039	2901	4292	2030	2942	2797	1185	3742	1883	1389
LTR59	0	12	7	6	3	8	3	13	1	1	5	7	0	0	1	0	63	39	45	0	0	0	39	28	93	22	9	0	7	74	1	18	50	0	70	0	4	23	0	0	0	4	0	140	20	9	1	0	0
MER11D	795	627	555	534	359	383	514	534	416	464	314	369	789	722	369	610	455	461	855	1009	606	941	813	1197	3	79	43	0	4	1	131	83	266	153	89	74	306	85	196	193	267	21	198	374	241	3	2	5	8
LTR108a_Mam	64	79	65	100	69	91	111	113	99	137	95	80	4	153	1	192	208	60	29	5	75	40	52	44	0	7	1	12	79	21	32	12	67	81	0	16	191	1	114	0	49	3	5	2	96	97	0	31	0
GSATII	2101	1641	1092	1449	981	1680	1690	1621	2092	2968	3054	3346	3752	3451	2618	2567	2981	2348	2151	3398	1849	2578	1294	1713	8	142	152	2	24	301	30	260	917	422	638	451	780	934	778	799	265	1191	424	678	479	3	521	40	173
ERVL47-int	27	38	13	11	17	40	24	23	6	46	16	24	29	0	3	32	215	300	144	56	105	32	11	14	0	9	143	24	138	13	2	6	31	136	20	42	61	55	55	44	15	510	102	34	59	2	0	57	1
MER11C	195	179	256	254	258	205	971	1069	590	842	295	300	97	210	265	139	1089	150	438	656	396	492	276	510	924	522	774	704	341	743	382	1143	1796	1090	656	1277	1567	1180	970	983	1759	307	1900	819	3118	692	789	812	549
LTR54	237	308	251	284	226	275	385	308	326	358	250	329	396	506	173	281	499	450	517	624	541	352	292	461	372	222	154	595	240	203	197	250	696	392	314	410	944	1083	324	487	261	567	216	521	640	239	675	171	298
tRNA-Pro-CCY	0	0	0	1	1	0	0	0	0	0	0	0	0	0	0	12	0	0	0	0	0	0	0	0	0	0	0	0	0	1	0	0	6	0	10	0	0	0	0	0	0	2	0	0	0	1	0	0	0
MLT1F-int	1594	2174	1873	1970	504	914	644	781	590	690	772	958	2137	2006	1370	1342	1121	708	567	822	1005	1360	765	1084	264	114	151	336	64	192	148	217	498	994	387	290	248	575	928	941	334	706	328	38	361	138	153	404	136
MER6C	7	5	5	6	9	4	1	12	17	13	8	7	1	14	1	0	28	30	0	0	1	23	31	15	14	39	11	30	33	4	18	32	60	5	0	0	119	96	36	98	106	113	7	107	66	1	160	5	1
LTR16B	278	289	139	281	246	345	339	364	324	348	288	377	1163	544	216	839	854	337	455	675	548	904	479	586	108	354	227	135	143	53	216	159	674	305	115	379	523	168	424	149	246	123	408	558	20	266	65	1	141
MER6A	2643	2168	1881	7600	6983	9775	9377	9338	8384	10046	8844	10722	12785	13790	7353	6460	7388	10655	7384	13055	11314	12050	8659	11506	799	1088	814	969	336	592	465	1185	3879	2974	1992	2037	2021	2141	1684	2133	1746	1296	940	743	878	259	1098	295	261
Zaphod3	333	365	260	367	345	308	477	544	391	502	359	308	227	174	193	164	752	735	418	477	520	546	399	653	140	129	71	47	97	49	134	79	319	493	255	378	238	338	102	197	355	195	378	27	167	90	401	115	61
Tigger15a	3096	3306	2653	5276	3957	4618	4806	5847	6968	6991	6014	7598	8681	6360	4137	4950	4868	6042	3798	6659	4672	5664	3860	5349	2081	1699	1326	1816	1158	1099	1105	2526	4777	4659	2742	2964	3212	2933	2713	3445	3761	2391	2503	1620	2728	793	3469	2099	893
Tigger2b_Pri	952	892	703	595	524	585	406	513	433	443	385	492	536	580	360	955	705	688	403	699	786	853	479	660	914	654	552	573	464	391	368	711	1104	1153	793	587	733	748	2110	1152	3757	1261	750	915	988	163	752	479	425
Kanga11a	205	155	123	98	67	113	75	82	97	134	92	140	25	243	349	151	545	102	288	41	111	131	156	114	74	207	195	108	77	35	81	187	388	286	115	196	301	271	219	375	135	80	28	158	96	99	200	80	80
THE1D	4831	3923	4104	10829	9938	10436	19189	19095	13782	16982	12752	16506	10258	9596	9182	6179	9156	7777	7183	6977	8396	9297	5948	9298	2504	3099	1815	2339	1358	1486	1162	2453	9759	5868	5853	7445	7826	7021	4197	6222	6534	6249	3167	4303	2454	735	6343	2428	1419
Ricksha_c	145	193	186	150	107	121	446	482	350	373	164	266	442	769	503	430	894	250	396	190	297	365	258	270	123	352	127	96	106	58	170	97	1554	755	291	478	682	357	479	262	435	353	119	137	199	123	901	125	44
FordPrefect	1426	1501	1240	430	356	443	733	843	499	727	392	667	1951	583	668	1414	1591	1408	825	1215	1020	737	881	815	101	639	252	514	389	107	133	686	1230	572	267	722	2392	2467	972	1145	918	454	644	714	887	519	278	224	518
Charlie10a	121	135	103	141	84	108	99	138	147	153	72	128	108	34	103	82	55	168	102	218	98	75	31	94	512	416	324	612	200	765	365	659	146	261	248	162	949	1107	586	873	798	667	582	459	259	32	270	88	230
L1M3c	281	241	231	259	192	212	209	216	232	185	194	231	755	332	1065	174	486	434	407	318	344	554	244	243	186	424	272	54	157	319	98	292	1276	592	322	369	443	580	359	576	248	339	88	225	874	146	552	163	268
L1M3a	1709	1226	1522	1201	827	1024	1352	1398	1242	1347	1764	2273	1720	1091	1251	1161	1632	2518	1561	2450	1267	2023	1128	2230	1064	615	559	1364	460	515	484	777	1826	2136	942	999	2387	1792	642	863	1510	1402	682	608	1761	664	121	1480	1330
L1M3f	187	156	192	184	227	265	231	287	224	237	138	209	594	98	235	78	649	510	355	692	281	707	184	637	277	372	148	52	62	22	382	198	1140	526	410	910	1734	1305	705	1216	391	133	447	1375	410	46	545	243	150
L1M3d	307	318	229	323	382	347	644	630	463	321	224	243	641	473	182	412	487	140	423	159	271	222	202	450	147	162	157	538	221	193	199	99	262	191	171	123	277	126	5	325	401	282	249	110	104	60	1011	45	67
L1M3e	51	36	57	114	75	104	98	103	139	99	96	148	28	22	15	16	97	251	94	79	402	181	220	301	28	53	23	24	21	12	11	46	939	170	122	314	183	90	9	504	263	23	25	7	73	14	1288	41	23
LTR47B4	4	25	5	47	29	32	42	31	29	45	39	45	414	136	87	96	216	41	16	136	114	52	55	62	2	0	10	0	0	0	70	35	256	44	30	32	13	57	0	3	0	405	231	1	40	17	0	32	4
MLT2C2	161	141	113	327	207	250	348	359	334	443	280	322	951	488	824	252	620	386	508	549	412	283	473	317	195	171	110	182	134	93	111	421	1036	377	294	283	426	371	20	221	195	211	420	125	173	144	268	267	305
MER92C	211	177	187	161	309	382	324	381	302	283	446	567	237	157	267	91	102	145	164	238	208	164	176	229	5	0	18	0	18	66	8	85	15	41	23	49	0	0	0	9	73	1	0	21	10	74	2	0	34
MER92B	533	658	547	559	581	564	761	960	828	1005	606	884	728	458	158	297	724	300	510	1006	497	360	459	461	470	233	246	339	253	444	174	851	805	639	252	330	776	367	634	836	649	314	398	1236	271	235	185	530	360
SATR2	27	12	3	460	236	379	737	623	507	879	393	494	482	337	771	498	296	132	393	139	671	1132	242	487	109	0	10	26	6	3	19	123	365	536	261	134	7	0	0	0	0	1	76	230	102	0	708	5	6
MER92D	8	5	6	9	11	10	31	28	14	36	16	16	0	2	0	40	17	0	41	0	23	55	25	0	0	24	0	0	0	0	0	0	51	0	6	90	0	0	0	0	0	7	0	0	1	47	0	56	26
LTR47B2	197	180	142	203	245	163	191	205	168	189	198	284	24	368	193	78	442	611	190	183	328	296	99	185	222	463	76	9	134	142	50	46	167	468	107	254	147	3	33	209	149	0	296	192	1973	650	986	1146	426
LTR47B3	12	10	11	15	5	14	12	11	21	6	2	13	1	0	54	0	75	45	45	1	9	2	23	66	126	97	243	67	50	137	222	148	0	36	23	11	745	784	405	201	449	519	374	228	78	34	16	12	50
LTR1A2	6010	6560	6024	2411	2719	3419	3190	3196	2731	4037	2421	2958	3730	3563	2438	2504	5162	3515	5994	3638	3684	3402	2975	5473	906	918	799	1084	686	636	767	1483	7077	3779	3146	4096	3422	3541	2934	3621	3584	3759	2776	3373	1805	562	11448	794	549
MER51A	4798	2922	2501	3018	2152	3011	3698	3957	2794	3071	4159	4566	5311	3750	3257	2810	3066	3132	2279	2541	3322	3769	1781	3435	1140	1201	866	902	850	916	843	1080	3154	2650	2234	2648	4764	3132	3281	2891	2679	3586	2084	2904	2343	720	491	1410	621
MER51B	445	473	401	939	1047	679	1025	1110	996	1397	1129	1401	1496	1458	644	841	1403	1020	891	1374	1082	1029	638	1025	458	1592	684	1031	834	534	446	756	2142	929	412	935	2771	2620	942	1755	1325	2905	951	2509	1279	319	489	642	494
LTR1A1	196	167	191	189	182	254	235	298	162	246	189	228	192	536	370	290	143	914	533	473	476	264	287	317	299	323	452	349	248	506	345	429	661	178	433	267	911	965	518	1516	728	790	1064	536	94	253	724	180	208
MER51D	7	11	9	34	11	21	52	44	48	39	34	32	9	8	206	62	14	150	11	6	39	8	44	7	11	26	36	159	117	72	31	13	159	8	10	69	27	52	30	14	13	14	9	34	11	4	47	76	5
MER51E	3010	2720	2728	6680	4692	5912	6528	7574	4331	5515	6301	7586	3539	3449	3242	2927	3533	3590	2706	3008	4804	4790	3038	4289	116	289	153	141	192	126	34	128	885	791	1161	814	716	1272	529	1051	966	2772	498	564	62	104	368	221	140
HERV4_I-int	411	313	203	339	282	504	369	423	399	450	636	738	573	660	398	463	1432	885	730	1017	1374	968	525	955	423	186	319	169	172	106	88	117	380	344	208	539	1015	1315	537	328	775	1525	461	592	408	124	541	234	332
LTR86C	1406	1223	1300	932	504	768	721	984	862	1004	625	820	394	477	309	276	216	396	246	629	267	300	156	330	75	129	59	95	2	59	53	76	156	379	202	481	174	137	2	217	27	0	18	10	309	35	38	0	19
MER45C	1562	1583	1669	7687	5455	8576	11008	10861	11790	11117	14059	16615	12920	9627	7926	8492	10430	13950	8126	16286	14195	15484	10251	13710	907	1184	1084	662	335	762	358	1644	5754	5099	3790	3260	2583	1832	1672	2267	2125	3998	1844	851	749	55	657	199	231
MER45B	114	103	92	259	194	195	342	389	305	402	287	294	132	358	534	233	569	491	734	433	579	602	306	464	155	104	108	239	86	125	146	211	898	240	139	322	813	513	200	510	267	163	198	119	221	33	768	120	76
L3b	7241	6595	5625	4362	3435	4013	4713	5315	4028	4782	4823	6481	6958	6546	3446	3584	7763	5180	5463	7082	5868	6688	4501	6429	2361	2142	1776	2943	1775	1894	1984	2464	5706	5454	3247	3516	5462	6853	3514	5202	5434	6618	4101	4766	2919	1814	2878	3311	2307
LTR108e_Mam	52	34	29	10	31	10	15	37	5	37	30	7	0	278	3	1	12	1	23	82	20	0	0	0	68	37	1	5	2	0	0	10	69	8	8	40	0	25	0	29	17	0	1	0	123	21	23	7	45
MER75A	11	8	19	35	12	28	42	31	30	29	31	27	114	11	129	10	3	86	37	78	35	18	31	72	0	26	29	0	3	0	0	0	0	12	10	28	28	181	69	33	22	3	0	52	5	0	0	49	6
Tigger11a	913	1151	767	3748	2925	1925	2086	2099	2883	3190	1519	1819	539	1202	775	458	1028	636	513	694	1111	897	471	1028	157	137	193	135	153	165	180	170	394	232	133	238	274	211	357	426	411	293	515	55	180	425	179	630	407
Ricksha	166	162	173	84	49	66	84	96	110	57	73	45	345	624	200	2	41	266	59	185	140	375	74	295	43	221	52	0	21	3	7	4	143	63	116	75	101	7	1	211	65	260	48	1	50	8	839	3	46
HERVL66-int	16	14	15	13	10	25	7	35	14	11	4	14	3	0	0	8	24	1	85	82	8	1	1	84	97	261	66	126	47	31	63	117	10	33	78	42	494	504	267	288	284	357	146	770	134	3	439	201	73
L1MA1	1186	1165	1010	1436	1395	1728	2036	2442	2470	3134	2273	2767	2555	2259	2498	1681	1777	1962	1704	2990	1613	1902	1331	1973	2744	1226	1538	2073	1370	1938	1391	2277	5829	2838	1302	3302	2903	2400	778	1915	1617	1917	692	2052	2057	709	6952	1363	595
L1MA2	7568	3035	2821	15360	9246	9916	25335	25422	16385	25519	24840	32985	22424	16461	14977	12077	7767	5724	19712	9030	9787	6219	6751	9630	5899	9870	10686	8505	4692	7156	5242	7982	21220	18345	21421	26810	60823	23539	17162	23830	9112	6471	18928	14569	8909	8186	18875	32206	13117
L1MA3	2113	2012	1928	2952	2776	2552	2989	3354	2945	3367	2617	3065	5211	4815	1794	2061	3945	3465	2967	3732	3337	3041	2108	3711	3594	3160	2035	3722	1498	2209	1986	3550	10757	5636	4108	4900	8574	5726	5759	6304	6510	3281	3852	5549	3598	911	20556	1991	1698
L1MA4	6565	4907	3961	3347	2644	3097	3209	4068	2451	3174	2970	3773	4304	2953	2596	2359	3680	4120	3143	3220	2940	3289	1998	2608	3060	2732	2445	2719	1722	2139	2300	2484	8107	5152	3079	3131	5425	5918	2661	4344	3946	3716	2790	2847	3495	1512	11148	2643	1970
AluYc	11704	10355	9601	11091	7671	9096	17232	17781	14394	18328	14027	17886	8528	9077	6462	5614	9070	6664	7274	7388	8781	8583	5872	8404	5875	5520	3981	5065	4172	4572	3722	3933	9474	7451	5459	6877	13354	11628	9725	9204	10093	10988	7224	10736	7042	2997	6120	6325	3898
L1MA6	1027	1078	806	1428	1037	946	2463	2538	1996	1937	1606	1659	1953	1969	702	851	1325	2249	1669	2683	2070	2994	1295	1917	1756	1299	1087	1551	883	702	678	1381	3981	2631	1520	1365	2492	2373	1402	1438	1382	1461	1689	1141	2156	793	3696	1710	794
L1MA7	4326	4469	3794	5509	5262	5635	6047	6363	6538	6949	6557	7913	8936	9443	4010	6318	5423	7283	5619	8151	5670	6964	4112	6651	1668	1635	1775	1687	556	996	807	1922	6370	5577	3441	4140	5297	4597	2432	4829	4358	2061	1989	3550	2942	1019	4489	2140	1595
Charlie29a	1406	1033	728	1270	735	824	2015	2374	1544	2073	1257	1659	1579	1022	475	673	1476	826	1186	1576	1219	1331	901	1555	599	418	316	403	162	383	275	527	2223	1199	429	1265	1048	1293	866	948	1072	1468	847	927	241	117	3107	351	135
L1MA9	9758	8339	5912	15110	9158	8814	20401	20269	14851	16911	15237	18178	21677	16094	7956	9184	10094	10792	9737	11465	10870	12375	7623	8969	4910	5080	3864	6239	2900	3227	3978	5961	16387	13791	7990	10748	15147	12294	6601	10916	9301	7787	5704	6933	6785	2924	19204	5319	3382
MER4D1	751	660	653	1013	935	1250	1889	1961	1436	1964	1556	2272	3005	1974	1405	1147	1711	1402	2084	1877	2540	2773	2209	2844	1010	604	469	522	500	835	739	802	1211	1345	601	1173	2233	1698	1522	1052	1661	863	1108	872	878	142	1456	481	606
THE1C-int	30	26	39	47	144	122	200	213	195	182	111	114	274	434	154	56	818	433	604	303	235	155	95	106	567	742	255	390	163	351	138	287	3443	1500	832	3021	992	589	336	886	1082	749	236	1382	598	255	3128	316	343
tRNA-Leu-TTG	0	0	0	0	0	0	0	0	0	0	0	0	0	0	0	0	0	0	0	0	0	0	0	0	0	0	0	0	58	0	0	0	42	58	11	40	0	0	0	0	0	0	0	0	1	0	72	0	0
tRNA-Gln-CAA	431	349	307	214	97	227	185	231	86	120	376	544	227	151	373	140	1202	983	885	933	900	1435	913	1245	46	136	21	0	29	38	4	37	145	168	141	82	34	0	43	80	30	1	58	0	59	10	5	17	0
ERVL-int	34	49	49	129	82	166	148	217	238	225	97	127	363	103	14	146	465	194	304	237	334	480	122	95	416	167	231	292	413	188	223	120	1462	217	276	962	169	514	187	217	743	246	120	186	362	164	2643	163	115
tRNA-Leu-TTA	3	6	2	3	2	0	0	5	0	10	0	0	0	17	0	0	0	0	1	37	31	0	0	0	0	0	0	0	0	0	0	0	0	0	18	17	0	0	0	0	0	1	0	0	0	0	0	0	0
tRNA-Gln-CAG	23	23	50	5	4	4	58	55	39	39	12	13	75	87	25	31	19	43	16	0	33	42	65	26	0	19	13	6	0	6	8	0	71	10	10	0	33	17	0	6	5	33	4	8	4	1	15	4	0
_GAATG_n	0	7	1	7	2	5	4	24	19	8	1	0	0	86	5	0	36	52	25	84	31	220	8	38	82	28	110	89	31	153	60	20	17	350	0	40	32	37	0	136	352	18	25	3	1006	4	4	19	79
MLT1G-int	23	33	22	23	30	19	31	52	48	37	47	27	141	22	1	0	4	80	65	41	152	213	0	15	38	1	6	50	2	0	1	14	72	47	0	19	0	9	0	10	14	12	1	0	2	22	19	0	17
MER2B	513	519	394	433	472	461	519	718	457	557	567	597	661	425	720	185	514	466	530	506	509	413	469	606	484	363	355	426	268	310	500	633	624	487	323	334	1243	891	610	908	1098	922	573	896	404	401	460	438	460
SSU-rRNA_Hsa	568545	488450	400234	2063792	1463861	3137979	4226968	3653422	2648327	3791235	2251647	2741829	434583	398129	400034	395177	1072481	1093761	949521	1413520	1366730	1272235	817809	1084752	58549	89134	59616	157566	101615	108878	65791	100737	80790	48886	94110	88095	468047	416923	386356	510851	438765	536506	324083	290086	267623	304844	541722	416156	261076
Charlie19a	434	478	333	523	299	390	341	394	355	386	344	475	350	575	504	126	680	812	675	1242	826	743	759	819	321	379	228	488	156	377	193	542	1044	979	511	913	612	1019	153	928	909	381	711	972	457	185	894	413	255
MLT1-int	31	67	24	592	206	261	271	326	221	240	290	471	552	269	37	158	269	317	158	91	103	220	103	99	42	51	21	35	82	6	64	148	133	248	85	250	16	212	24	175	26	182	106	0	45	24	9	133	19
MLT1E2	6066	5336	4632	6051	5134	6194	9435	10239	8023	11434	6161	8267	8642	7080	6270	6313	11276	10911	10024	13823	10280	11396	6722	10547	2446	3121	2624	2669	2113	2096	1911	2252	9847	3956	3334	5295	8000	8462	4588	5949	6466	6687	3717	4185	8328	1648	7336	4025	2530
MER21-int	25	37	33	53	21	13	49	53	32	36	53	77	109	421	59	1	211	364	73	674	167	362	227	100	268	361	180	189	6	266	171	101	849	637	366	462	1121	390	921	535	705	1301	69	1021	489	82	927	227	30
MLT1E1	992	867	927	840	732	555	832	945	764	1012	608	983	1273	1357	641	1249	1109	1193	1193	1484	1563	1500	989	1565	205	327	286	39	81	206	158	254	1349	1606	600	838	1061	1217	699	704	1345	1831	522	507	263	187	735	296	172
tRNA-Asn-AAC	0	1	4	1	0	0	0	1	3	2	0	1	7	0	0	0	0	0	9	0	12	5	7	0	7	16	5	37	1	0	0	9	91	6	4	23	24	0	0	0	30	1	1	46	55	1	0	0	0
THE1A-int	6	22	28	62	153	99	147	175	57	97	107	98	711	1199	593	71	2461	643	2013	463	380	334	228	413	1645	1876	980	795	1129	1765	827	1394	14003	7373	4948	8929	3131	2949	4165	2461	2890	2710	1542	3798	1701	1069	11770	1377	855
tRNA-Val-GTA	1	0	0	0	0	0	0	4	0	0	0	0	0	0	0	0	0	0	0	0	0	0	0	0	1	0	1	0	0	0	0	1	22	4	0	0	0	0	0	9	0	0	0	0	0	0	0	0	0
LTR72B	476	414	280	380	387	424	739	616	455	695	368	347	778	1730	294	943	1346	862	975	855	779	910	440	989	57	37	18	2	0	0	0	7	333	361	250	164	116	37	19	15	116	1	12	0	120	15	67	23	64
Charlie4z	2915	2394	2200	3371	2777	3903	4758	4574	3998	4915	4592	5777	6787	6287	3209	3559	7071	5407	5628	6219	6952	7114	4572	7077	1493	1512	1134	1819	1395	1086	1040	1780	4131	3821	2701	2897	3408	3200	2885	2798	3331	3607	2139	3298	2254	795	1686	1535	1117
Tigger1a_Mars	3	12	3	10	6	0	0	8	1	22	18	7	0	76	2	0	34	82	11	2	29	187	1	0	0	0	6	0	0	1	0	22	33	0	0	47	73	76	224	2	26	19	24	64	114	1	0	107	57
MLT1F2	10382	9728	8919	4274	7010	12625	4713	5585	4046	5721	4207	5671	16243	16659	10699	11713	10485	6883	8743	9054	9529	8302	7242	9578	2274	2018	2073	2542	1350	1644	2057	3143	11785	11023	5454	9481	9716	9434	6026	10653	10362	8921	5270	10247	4480	1141	6807	2341	1445
Charlie4a	1255	1421	1169	935	763	811	1067	1085	965	1167	916	1075	1381	1508	1289	1480	2100	1683	1419	2157	1505	1385	1261	1794	786	888	484	885	541	479	613	720	2602	2102	1612	1580	3050	4160	1768	2531	2319	1165	1577	2262	870	378	1834	762	740
MLT1F1	2202	2083	1793	952	943	1064	1057	1091	1027	1381	809	991	2785	1583	731	1909	3680	2065	2659	2035	2557	1492	1539	2278	783	838	655	707	510	863	547	1049	2931	1732	1232	1524	3222	2507	2864	2460	2307	4038	1519	1496	3245	553	2929	1143	895
tRNA-Cys-TGY	7	0	2	4	1	2	2	1	8	2	1	2	0	27	19	22	6	0	12	21	14	10	25	0	13	21	11	0	0	11	2	13	75	59	15	28	51	12	0	59	63	0	0	176	0	0	23	27	18
tRNA-Gln-CAA_	217	337	191	2183	2487	4364	1407	1747	2069	1552	2053	2700	5459	5071	2806	2948	14067	11536	10574	12730	8916	6867	5894	10139	3458	1577	2199	4916	2794	3343	2230	2677	1808	1456	1486	1337	11119	9277	8453	10795	11453	8409	4568	8075	6018	1916	13825	3609	2673
ERVL-E-int	1834	1667	1322	2847	2657	2871	3226	3308	3104	3717	2608	3474	7346	6637	4375	5642	7587	5342	5002	6752	5570	6011	3805	6059	1388	2025	1449	1795	1447	1225	1073	2022	7846	4271	3130	3540	7519	4271	2928	3083	4488	5847	2854	2389	3946	1004	6936	1865	2072
X2_LINE	0	0	1	2	1	2	2	0	2	1	0	3	0	0	0	0	0	0	0	0	0	0	0	0	0	0	7	0	0	5	0	0	80	0	0	0	7	0	0	6	0	0	0	0	0	0	0	0	0
X7A_LINE	553	527	458	616	543	637	540	682	453	558	468	525	556	707	314	265	705	601	420	410	553	566	399	411	292	256	271	310	201	60	255	323	834	878	558	509	804	1100	565	657	602	1184	522	752	97	27	320	123	141
MER50-int	950	647	612	589	633	939	908	1004	763	1092	607	763	597	497	518	618	1435	845	651	737	645	956	649	702	471	581	338	122	176	276	351	365	783	597	256	537	802	502	373	340	1162	696	251	907	255	238	34	562	338
LTR54B	225	276	164	508	380	333	465	447	412	625	436	474	409	363	610	722	384	507	440	351	452	692	540	335	411	344	215	206	77	139	155	117	700	623	516	220	646	307	326	303	580	537	26	837	360	171	137	213	123
MamRep488	174	163	186	154	127	169	128	147	151	147	138	222	23	90	52	149	160	172	194	84	136	210	126	195	46	148	75	83	11	187	77	127	683	240	185	270	238	99	65	100	72	136	303	220	377	11	475	146	60
AluSx1	70596	67743	56777	59711	48176	54850	83832	84467	78336	92597	73710	90116	69611	66037	41359	45235	73130	54865	60927	66433	65646	66870	47010	65425	60095	55399	39347	60993	43898	50899	42262	52401	105017	71160	57406	72579	142277	126623	118903	114471	117917	128203	96378	125418	65345	31469	48333	60847	38720
LTR102_Mam	79	78	74	104	74	128	160	139	106	156	145	122	131	292	85	155	146	113	328	43	238	272	128	142	80	112	45	68	44	0	18	111	249	106	125	100	49	519	76	136	186	23	5	70	31	6	464	109	8
PABL_B-int	223	108	87	214	170	218	238	269	191	326	139	314	422	489	71	303	309	355	646	167	296	381	183	129	152	23	23	24	80	68	45	33	746	301	271	244	401	100	4	445	76	302	255	76	192	12	70	24	78
MER41-int	1203	1390	1195	826	779	1298	873	1012	864	1009	1114	1173	611	532	280	1075	1250	1476	1650	746	975	1199	1023	898	1388	1067	1048	1554	1067	683	565	1290	2683	1887	668	1603	2526	2333	1360	2417	2155	3329	1291	1611	899	374	914	510	964
LTR27D	164	83	68	107	108	85	122	125	176	128	110	121	498	57	9	0	242	0	109	150	292	97	105	186	14	1	0	1	0	25	52	7	23	13	60	140	6	294	0	29	15	4	9	0	19	21	153	14	0
L1MA4A	11262	9665	7041	6607	6071	4990	13686	12934	7226	10005	10127	11824	7230	8790	3395	5502	7021	5845	5785	6833	5569	6618	3969	6446	3499	2944	1411	2919	1229	1468	1455	2217	6302	3905	3191	4169	5876	5365	1995	2515	3174	2914	1934	3251	5404	1199	11681	2027	1418
HERVIP10FH-int	743	512	442	1390	1903	3081	2262	2505	3233	4946	3135	4020	2830	3429	2903	3275	4182	1820	2919	1106	1948	2254	1293	2397	1252	699	842	693	1353	769	818	723	24060	8211	7704	18030	1288	1746	531	990	914	1488	292	471	1971	198	2661	565	286
tRNA-Met_	0	0	1	1	0	1	0	0	0	0	0	0	82	1	0	0	10	5	0	0	0	6	0	0	0	9	0	4	0	0	1	0	0	0	5	0	74	115	0	0	0	0	0	0	36	0	0	12	1
MER67D	245	232	122	274	312	425	342	350	278	365	276	360	863	207	179	172	475	597	568	370	783	644	374	287	107	16	225	10	51	13	47	139	612	63	122	52	93	65	21	415	137	369	90	220	11	57	934	17	106
MLT1H1	3155	3228	3135	1950	1564	2127	2072	2163	1935	2092	1542	1866	6076	4726	2910	2620	5908	3345	3866	3943	3814	3509	2428	4038	1274	1717	866	2592	1357	1442	908	1564	3543	2374	2242	2276	5613	4240	1857	3414	3023	3302	1921	1682	2600	607	3686	1376	957
LTR22B2	15	13	12	7	8	8	45	55	27	26	28	40	13	3	8	4	9	5	1	4	24	23	2	3	6	15	1	0	0	15	0	0	1	6	80	41	6	0	0	1	48	2	0	1	1	0	12	2	0
AluYk4	5752	5092	4570	4670	3612	4411	8474	8201	7286	8624	7541	9467	5514	5035	3824	3321	6198	4643	5255	5501	6592	6488	4691	6531	5099	4853	3658	4368	3985	4057	3508	3714	6976	5185	4026	4477	10233	9327	7327	7287	7239	8571	5746	7477	6140	2712	6017	5788	3685
MLT1M-int	0	0	0	0	0	0	0	0	0	0	0	0	0	0	0	0	0	0	0	0	0	0	0	0	0	0	0	0	0	0	0	0	0	0	0	0	0	0	0	0	0	0	0	0	0	0	0	0	0
X3_LINE	556	508	406	302	269	387	336	371	291	328	336	385	1179	787	570	515	770	797	618	766	568	766	585	813	282	230	144	191	211	253	103	302	742	630	474	528	613	551	594	388	533	363	548	446	301	88	273	115	85
MER8	539	595	509	518	448	647	468	530	539	563	457	458	1280	905	259	754	381	993	750	855	983	1279	714	937	773	801	464	823	484	497	359	609	1017	736	687	745	1161	1064	1628	1298	1176	750	575	1096	736	382	668	643	454
tRNA-Leu-CTA	0	0	0	0	0	0	0	0	0	0	0	0	0	0	0	0	0	1	0	0	0	1	0	0	0	0	0	0	0	0	0	0	0	0	0	0	0	0	0	0	0	0	0	0	0	0	0	0	0
MSTC	347	362	347	480	421	524	603	602	613	737	444	626	1050	758	875	1275	1603	727	829	1015	711	820	476	602	1263	1688	831	1335	946	844	620	877	2168	1085	953	1305	3316	2637	2249	2966	2891	2676	1780	3766	3664	659	2525	1479	815
LTR2752	179	247	180	179	107	119	153	160	137	170	122	183	393	584	119	39	444	236	291	317	565	263	228	591	105	7	55	317	19	141	8	86	495	94	130	131	405	64	424	238	212	200	256	62	230	27	1047	207	72
LTR39-int	4	2	0	16	8	14	18	20	15	4	11	9	12	2	5	2	0	0	3	0	14	0	16	1	5	14	0	0	0	0	0	0	20	0	0	39	46	7	3	3	5	9	5	2	38	8	3	7	2
HSAT5	2	2	6	9	1	4	3	9	4	5	4	0	0	29	0	0	4	0	1	115	0	0	0	9	0	2	2	0	3	28	0	1	0	0	0	0	0	0	0	0	0	0	35	1	29	0	0	3	0
HSAT4	89	89	51	71	117	122	89	53	135	201	101	61	237	328	20	55	220	538	131	157	167	346	153	522	3	2	1	1	0	1	2	1	0	5	43	35	25	646	89	151	316	563	246	2	160	1	0	35	0
LTR22B1	1278	987	931	1481	1202	952	1831	1849	1435	2095	1102	1297	957	1298	622	695	986	774	630	523	1234	1044	794	1394	224	18	59	67	39	2	9	70	263	229	185	238	111	236	41	101	206	189	179	60	24	13	38	85	121
HSAT6	0	0	0	0	0	0	0	0	0	0	0	0	0	0	0	0	0	0	0	0	0	0	0	0	0	0	0	0	0	0	0	0	0	0	0	0	0	0	0	0	0	0	0	0	0	0	0	0	0
LTR46-int	30	39	19	58	5	87	50	45	96	117	25	34	1150	768	307	191	54	221	234	191	23	338	131	121	94	123	179	160	203	8	63	160	231	593	354	449	14	1	139	96	0	4	0	696	242	0	0	154	251
tRNA-Thr-ACG	0	0	0	0	0	0	0	0	0	0	0	0	0	0	0	0	0	0	0	0	0	0	0	0	0	0	0	0	0	0	0	0	0	0	0	0	0	0	0	0	0	0	0	0	0	0	0	0	0
L1P4b	4	4	4	18	17	26	15	36	8	29	28	45	366	16	117	7	46	23	28	19	49	16	6	10	36	159	22	147	14	15	26	24	956	296	19	560	26	26	15	146	16	117	9	143	60	18	116	29	23
L1PBa	420	475	589	706	495	532	770	835	673	743	511	642	1970	1787	575	795	2180	1081	1469	1032	709	1617	936	1194	810	1203	894	1300	588	265	566	628	3825	2496	1461	2446	2542	3583	708	1303	1769	622	745	1337	2400	275	6376	1021	338
L1ME3G	5745	6979	5415	8027	6425	6893	6354	7016	6201	6603	6220	7369	10118	7509	4247	5183	9185	7773	7264	7301	7129	7716	5615	7374	4813	5070	3268	5186	2434	3160	2664	3289	9714	10985	5640	6160	7869	8591	7121	6524	8092	8336	4777	8888	5139	1893	6411	4584	2574
LTR16C	3540	3856	3215	4185	3107	4391	4464	4627	5455	6142	5614	6898	10151	6880	3966	5683	7336	6566	4985	6926	6336	7900	4671	6866	1052	1402	908	1028	981	1144	791	1497	5337	4484	3154	3065	3740	3266	2230	3021	3751	2571	1937	3066	1795	257	3214	455	457
L1PBb	18	16	21	21	31	12	27	31	45	31	43	74	260	37	9	2	55	142	79	702	3	133	82	162	38	28	26	7	4	5	8	22	285	44	188	655	473	153	7	7	7	5	81	6	177	7	206	68	20
LTR16A	2972	3133	2410	3451	3346	2933	4706	5233	4153	5341	3347	4081	6216	4261	3049	4084	4822	4880	4480	6464	4972	6431	3994	5283	1109	1091	1028	1228	691	936	1071	1058	4168	2329	1315	1666	3712	3406	2465	4068	3072	3771	2595	2982	1171	923	4808	746	679
LTR16B2	636	627	519	709	611	771	762	843	735	947	846	791	1065	774	807	578	606	953	778	924	758	841	805	823	79	211	117	113	38	50	70	164	916	596	491	372	555	717	381	394	313	767	272	47	243	75	989	167	39
SAR	0	0	0	0	0	0	0	0	0	0	0	0	0	0	0	0	0	0	0	0	0	0	0	0	0	0	0	0	0	0	0	0	0	0	0	0	0	0	0	0	0	0	0	0	0	0	0	0	0
MARNA	10338	8048	6634	5174	4031	4800	5892	6336	4262	5282	3393	4376	6213	5615	3420	4225	5433	5081	4373	5202	4405	5108	4264	5711	923	1015	996	1809	768	914	869	1419	2180	2356	1398	1422	3589	3671	2340	2890	2380	4250	1080	3190	2699	926	1750	2215	1550
LTR16B1	654	560	488	521	493	613	538	638	424	527	526	675	559	871	1080	434	849	773	583	1260	985	827	859	1179	286	223	130	103	165	280	75	249	616	784	416	427	181	188	43	893	333	711	42	333	943	102	390	277	153
LTR9A1	207	165	159	582	896	1016	716	719	589	622	1063	1160	1763	1775	934	1318	1740	1211	1554	1604	1955	1609	1372	2593	194	465	182	298	234	576	207	599	1162	604	445	944	527	624	337	627	945	968	573	1212	1429	227	551	266	418
MER58D	94	82	79	152	97	94	121	104	142	150	119	125	507	405	109	214	161	275	126	187	153	51	133	55	242	226	188	239	129	172	92	202	224	538	173	174	344	126	403	452	355	114	365	341	270	241	227	101	63
MER58C	502	533	464	1175	850	1029	890	920	1024	1076	1109	1200	1653	1386	899	896	1116	1359	832	1216	1414	1417	849	1447	1161	706	769	1535	528	643	689	1177	1531	1465	495	921	1350	958	1661	1052	1431	523	874	1660	941	516	1177	939	728
MER58B	5878	4614	4024	3970	4606	5516	6387	6921	6403	7629	7567	9359	9067	10073	5514	5511	8522	7010	7531	8140	7718	8286	5502	7711	2440	3087	2256	2640	1901	2070	1625	2393	7671	6756	4354	5519	9991	7290	4894	6040	6801	6969	3524	4932	3082	1614	2276	2495	1792
MER58A	5073	5238	4308	5439	4178	5160	6239	6877	6426	7365	6071	7271	7053	6705	3192	4668	8036	7468	6786	8694	7405	8379	5613	7571	4425	4050	2800	5034	2258	2405	2820	3541	6610	6478	3524	4370	7595	6658	6310	8211	5637	5651	4738	6326	4167	1873	5768	2956	2559
MamGypLTR2c	207	218	126	240	262	344	305	346	266	349	229	240	729	1013	485	164	436	349	527	390	300	457	154	301	112	122	51	43	58	83	119	32	1057	505	382	421	278	336	143	53	324	74	380	17	296	69	728	177	22
HSATI	15	9	15	14	16	9	12	11	6	7	15	13	291	84	55	0	6	1	23	68	1	39	23	6	0	30	5	68	7	0	0	59	4	2	12	0	0	13	0	0	0	0	3	0	0	2	0	67	0
Charlie3	88	141	108	97	76	145	94	141	75	118	92	106	252	103	14	22	141	413	178	346	323	283	251	187	409	77	136	329	450	264	281	300	922	1069	456	699	574	333	143	200	189	152	262	657	1441	458	1222	747	419
L5	292	247	309	249	180	169	230	250	208	293	219	306	342	398	220	322	483	245	299	531	417	468	308	555	153	225	124	169	39	133	90	213	326	469	263	244	431	204	487	292	281	47	132	169	361	26	228	134	87
L2	26146	26349	21463	40916	35566	50817	58828	59686	56586	71463	57926	72122	63721	53884	38700	35398	63716	60207	51442	67230	69229	74640	47900	66352	18245	19806	12259	17937	11583	16034	12823	17671	47798	36078	24534	30558	38438	42143	30269	32753	34350	37564	21900	28714	22979	8286	30878	15247	9881
Charlie7	1242	1351	1059	992	772	768	722	883	776	956	839	882	1014	342	595	861	2204	1396	1138	1470	1369	1310	1143	1230	635	615	529	675	255	443	212	506	1846	1608	697	651	1923	1006	680	1274	1460	594	823	1488	619	125	1428	362	354
Charlie4	4	1	3	20	2	14	14	19	3	24	16	18	0	87	2	25	13	53	14	10	4	1	21	25	18	55	11	291	10	0	52	46	170	67	67	50	25	3	0	103	1	5	35	49	0	1	131	102	0
Charlie5	895	1046	715	1067	603	601	940	972	957	1119	920	1060	2302	1743	1702	1028	1734	2099	1564	2466	2334	2023	1311	1422	554	533	469	804	296	358	519	552	1221	1400	526	1034	1524	2019	504	1213	1733	2142	405	1308	1365	429	918	1370	524
MER39B	842	1335	598	2307	2281	1943	3040	3178	3191	3230	3232	3905	3696	3104	1669	3007	2758	2266	2480	2373	1620	1545	1325	2404	595	530	496	545	906	521	306	661	12605	3790	3587	9005	1885	1304	1038	2319	1673	1817	1214	1662	786	64	1061	360	176
Charlie8	740	961	746	1597	1348	1609	1453	1613	1504	1499	1599	1939	2999	2273	1353	1653	2500	2483	2569	3620	2864	2741	2092	2822	629	934	541	696	415	499	1039	795	1592	2541	1649	1178	2727	1800	1854	2422	2192	2264	1423	2571	1110	971	933	1452	1261
L1MC5	11342	11515	8718	11893	10037	9753	9526	10648	10426	12037	13111	16031	14880	13369	9290	10789	13544	13094	10390	14480	12659	13555	8921	13498	5457	5437	4103	6454	2934	3530	3775	4991	11904	10728	6445	8021	15051	11303	11315	9753	10384	11022	7063	10133	6463	3093	7926	7199	4093
MER101-int	856	1225	834	1744	1127	1462	1610	1306	1358	1524	1073	1267	3317	925	838	1682	2203	1600	1451	1164	1327	2430	1345	2255	341	236	230	462	205	162	102	291	1061	1616	593	1287	1269	586	649	424	536	373	343	167	182	165	820	202	329
HSMAR1	904	1084	1424	1524	2112	1745	6541	6715	5439	8195	3531	4906	1810	1804	2007	1251	3112	1372	2638	1342	1254	1162	1120	1372	2611	4955	2367	4144	3523	2011	2231	2461	5272	4401	2818	3647	12692	10762	6331	7835	7952	11643	4509	7426	5409	2390	2913	4158	4851
LTR42	98	39	43	80	43	61	91	101	111	137	135	101	65	107	49	278	168	88	159	463	210	225	218	248	25	138	66	10	63	7	57	90	222	190	161	182	49	234	105	53	117	7	252	243	563	16	443	82	91
LTR41	688	606	442	664	665	769	800	934	962	1332	758	1065	2175	701	484	360	968	926	1149	871	1441	1208	946	1420	574	496	692	868	270	519	349	775	1157	950	815	1008	1164	769	653	1428	1568	1110	1007	554	666	669	580	1010	781
HSMAR2	9319	8548	6872	5495	4155	5693	4913	4471	3692	3906	3552	4178	3980	4752	1843	2018	5725	3413	3010	3746	3659	4031	2846	3883	1025	719	619	1009	690	1170	400	972	3729	3360	1467	1900	1917	2645	1815	2100	2580	1139	1215	1877	1579	416	1865	1830	1079
LTR46	213	158	157	203	123	180	221	180	207	308	261	291	720	592	655	464	187	224	380	702	245	319	343	313	120	233	104	128	29	36	89	344	447	435	457	447	322	596	446	415	659	578	408	685	251	119	2226	269	237
LTR45	740	265	215	324	569	682	988	1194	756	932	678	808	1990	824	704	1546	1345	934	1382	1245	1155	1330	794	1439	99	246	208	148	117	103	113	164	1036	845	879	1138	1116	1394	308	1292	519	480	518	639	51	37	27	33	40
LTR44	769	829	701	523	385	512	507	657	599	851	513	712	717	496	253	169	544	1213	369	831	1211	1671	563	1077	171	353	291	28	145	164	270	170	1079	344	297	250	377	378	279	150	1047	704	60	0	135	74	261	75	15
LTR49	193	217	188	250	245	242	312	338	252	381	243	330	581	470	298	242	1268	817	410	264	442	135	234	396	118	194	143	170	91	347	121	292	795	555	357	350	854	837	300	572	580	461	525	406	457	129	1587	204	124
LTR48	486	416	349	558	479	624	660	639	497	769	654	698	956	1190	861	337	1271	1099	915	796	799	1056	715	1005	200	321	311	205	324	432	209	318	679	568	253	336	843	331	223	1023	1315	1361	232	91	428	40	180	65	81
AluYb9	2248	2065	1740	1806	1377	1745	3252	3216	2908	3493	2751	3493	2103	2045	1350	1243	2391	1698	2032	2071	2298	2351	1623	2174	2477	2305	1809	2138	2000	2014	1797	1750	2719	2122	1614	1846	4854	4182	3411	3484	3485	3825	2766	3712	2893	1261	2286	2826	1761
AluYb8	4739	4380	3576	3726	2788	3557	6247	6120	5630	6808	5314	6651	3984	3699	3179	2512	4913	3638	4141	4626	4802	5055	3253	4334	4115	3842	2911	3536	3109	3264	2830	2870	4999	3760	2835	3422	7637	7045	5693	5843	5519	6474	4391	6220	5060	2063	4096	4579	2755
LTR38C	68	69	53	101	88	31	69	83	115	86	43	83	0	46	60	44	3	43	92	126	86	60	74	24	164	186	82	110	107	152	18	24	29	26	33	49	136	56	296	289	90	2	16	215	89	98	17	27	35
LTR38B	465	368	368	593	360	499	532	628	642	770	587	689	812	661	262	421	667	346	405	532	490	788	457	810	7	63	32	16	122	43	0	44	128	113	66	179	29	371	294	195	302	26	162	611	81	1	270	77	29
tRNA-Leu-CTG	0	0	0	0	0	0	0	0	0	0	0	0	0	0	0	0	0	0	0	0	0	0	0	0	0	0	1	0	0	0	0	0	0	0	0	25	0	0	0	0	0	0	0	0	0	0	0	0	0
Tigger4a	516	554	400	501	436	446	483	436	403	386	499	513	1413	888	572	826	1419	1174	781	1116	768	874	660	683	1767	1447	1153	1363	882	1062	1070	1047	2327	2136	1206	1400	2273	1801	1697	1485	2184	2327	1206	2386	993	557	1240	1349	1208
LTR26B	44	41	36	125	69	27	47	74	76	60	93	92	136	0	1	0	82	4	7	154	172	50	84	27	95	61	44	104	66	59	10	4	107	9	102	0	24	201	8	73	231	354	64	1	75	43	42	12	21
LTR26C	513	1037	564	701	808	768	798	872	590	929	521	809	1304	458	665	254	549	276	326	306	395	488	311	497	378	204	271	96	182	175	352	404	729	816	588	608	1075	713	932	607	1006	1634	583	2014	134	172	593	301	133
LTR26D	8	32	15	27	31	35	15	26	14	60	17	19	0	258	6	1	255	1	51	0	39	166	39	1	21	11	28	3	0	11	28	0	33	103	82	33	9	15	101	117	60	3	12	1	21	6	0	113	0
LTR26E	112	87	63	125	127	160	209	188	242	290	189	282	195	179	258	36	307	231	124	120	171	110	116	71	9	56	10	17	11	51	21	35	252	152	49	163	135	153	117	165	121	224	32	3	340	49	28	42	75
MER9a2	22	30	33	25	31	28	48	28	35	49	35	86	323	67	48	99	169	160	107	65	185	22	28	49	1496	630	629	1304	737	823	659	1321	1213	625	227	263	2727	1733	3011	3556	3517	2109	3062	1978	662	228	255	307	367
HERV15-int	95	54	90	59	67	115	173	141	124	146	58	99	480	83	513	58	535	207	267	160	119	457	64	169	8	7	29	13	0	157	29	0	449	232	270	328	0	370	35	76	19	81	0	1	1	1	413	5	0
L1MB8	6122	6801	5099	8335	6354	6926	7016	7864	8046	9031	8347	10020	14697	12136	6133	8898	13236	14971	10619	15756	10346	10579	8160	9485	9141	8344	4697	7106	3996	4788	3585	6089	16223	12227	7011	10634	18091	18763	9839	12892	11685	12548	8523	10670	7362	2895	15573	5468	3919
Charlie14a	295	225	210	267	144	140	199	241	168	165	187	143	336	48	185	135	185	84	22	264	219	218	70	189	140	133	128	366	152	153	354	625	273	224	45	184	485	37	6	454	1756	1373	295	61	300	88	94	197	132
HERV-Fc2-int	0	0	0	0	0	0	0	0	0	0	0	0	0	0	0	0	0	0	0	0	0	0	0	0	19	1	1	1	0	0	1	0	0	0	37	0	16	6	0	36	0	0	0	0	1	0	0	8	0
L1MB1	1623	2169	1680	1957	1624	1879	2089	2427	1910	2010	1795	1761	2034	2784	1463	915	2711	1924	1702	2903	2103	1670	1436	2568	2118	1693	1290	1552	685	746	801	1436	5154	2828	1837	2265	3261	2825	3773	2263	2917	2239	1698	2344	2595	779	9883	1128	1119
L1MB3	8781	8090	6385	8951	8190	9221	9942	11309	8725	10305	9207	11498	13255	10179	6052	7409	14556	10684	10641	11145	11745	12944	7468	11141	5580	6642	3520	5842	3003	2992	3078	3770	12313	9302	5881	6471	10638	9764	6991	6431	10312	10036	4388	9184	10608	2778	15634	5980	3336
L1MB2	3305	3389	2689	4043	2984	3141	3473	3871	3426	4460	3725	4555	3879	3811	3480	3365	3463	4083	4645	4635	4088	3561	3339	5216	4233	3829	2615	5228	2226	3139	3187	9699	6871	9830	3039	3899	6449	5504	4695	6154	7353	7467	4470	5952	4348	2057	6539	4809	6652
L1MB5	2939	2755	2425	3590	2791	2838	3791	3861	3630	4079	3373	4080	4693	5506	2696	2829	6376	6225	5265	5409	4978	6012	3851	4797	3442	3004	2146	2216	1414	1475	1618	2094	6773	4738	3774	4620	5782	6102	4371	5524	4064	5174	2253	3330	5233	1220	7778	2681	1740
L1MB4	4614	3976	3420	5142	3640	3577	4434	5397	3793	5255	4249	5441	5752	5486	2733	2383	4744	5953	4097	5769	4238	5738	2815	4128	2771	2551	1661	2757	1554	1368	1693	2264	7650	5708	3059	4179	7219	7098	3986	4025	4327	5407	2546	4396	3710	1221	6277	2468	1456
AluJr4	11784	10815	8944	12072	9425	12085	15684	16580	15280	18956	14013	16886	15216	14746	10315	9347	19241	13484	14244	17966	16728	16886	11386	17224	9837	9584	6167	10806	6248	7625	6087	9319	15650	12092	9691	11795	22409	18425	16701	16945	17267	21049	12243	15160	10557	4394	10231	10130	5755
L1P4a	480	798	503	857	936	1363	1380	1548	1063	953	761	876	1639	1712	539	951	1195	1531	656	2341	1458	1492	897	1122	237	183	75	386	15	58	81	94	814	564	666	603	692	772	467	425	359	232	61	86	46	26	1252	136	61
MamRep4096	3857	2870	1945	832	769	573	776	872	684	854	696	800	966	1220	557	382	1146	625	813	1093	798	665	679	1369	99	364	272	313	218	160	275	279	594	777	373	671	1102	807	972	430	1324	2432	302	1058	372	145	697	322	197
MER135	32	42	47	40	39	37	46	54	62	67	39	51	111	151	36	106	83	164	49	84	89	6	36	83	59	64	48	48	4	67	49	59	207	43	79	123	207	105	54	75	90	8	73	57	56	7	282	22	34
THE1-int	93	119	77	112	92	155	150	140	75	126	164	159	340	346	253	306	396	210	260	303	203	286	119	259	136	171	103	128	82	135	107	134	1242	527	275	537	207	203	169	230	308	155	96	194	387	203	1227	158	71
HERVS71-int	8475	9451	9402	6778	6293	10698	11765	13497	8907	10245	9639	11233	12161	8619	9562	4932	9361	9895	7774	12439	11790	11515	9784	10480	888	1005	770	104	167	281	742	1246	3136	5379	2886	2855	2071	2321	638	2030	1327	1811	1587	1153	2657	193	1547	763	293
MIR	56185	55820	44847	55632	47393	56032	62279	67483	59660	70320	60629	73580	97093	87298	57276	58347	97567	84552	78825	102507	85813	96197	61548	88531	34272	35970	24268	36820	22813	25659	23138	30159	84930	73320	44746	56482	80331	77425	60006	67878	73535	67817	42904	63808	49278	16183	59134	31005	20593
HERVK11-int	4	1	4	16	8	2	137	142	97	116	18	45	0	0	2	118	698	134	350	192	203	200	54	14	449	141	181	41	224	93	233	260	353	482	147	873	351	801	138	374	392	507	500	442	92	161	17	58	98
ACRO1	8	13	0	240	41	20	420	568	599	727	360	528	4397	2644	367	1202	1129	2145	1396	1779	1291	1503	992	1710	95	25	6	152	6	15	92	25	400	241	308	260	143	136	4	160	62	16	17	0	5	125	463	16	1
LTR90A	28	29	35	52	93	61	84	88	65	154	82	60	226	45	49	143	272	248	75	221	18	81	154	105	170	66	101	115	21	77	137	10	141	38	53	141	413	419	86	989	447	111	493	89	248	62	79	152	74
LTR90B	343	356	188	172	204	160	135	193	135	132	147	206	240	26	35	67	147	227	120	230	200	139	115	186	83	80	39	71	105	51	62	36	128	117	72	137	171	170	11	140	81	8	48	49	2	38	15	8	31
MER65C	68	67	75	120	91	118	137	201	101	143	57	99	334	332	29	98	217	57	77	331	191	127	149	117	88	183	25	103	121	89	42	267	250	225	181	84	334	116	442	148	396	297	111	379	42	107	196	250	186
MER65B	74	167	75	40	52	73	68	99	78	99	71	35	16	31	1	41	33	3	49	20	96	9	50	64	65	149	109	6	0	45	7	73	149	259	7	138	170	7	230	1	728	1384	400	112	48	1	60	81	20
MER65A	1196	1791	1471	1829	1241	1036	10964	11024	3115	4290	1367	1538	4516	3323	1494	2003	2385	1636	2097	1438	1887	1449	903	1665	467	771	443	615	401	363	626	484	1942	1211	898	1437	2040	2001	1343	1826	1676	1932	885	1693	1603	246	990	702	421
HERVK3-int	204	187	141	575	590	723	950	1016	994	1447	653	831	1085	1340	1415	627	2215	1958	1108	1442	1716	1288	980	1374	1211	1456	832	2441	2705	1523	1655	1622	1035	839	471	1043	2341	2873	1672	2873	2500	3330	1831	2664	4330	1492	17	2816	1416
L1ME2z	5535	5399	4014	5280	4629	4417	4420	5448	4845	5130	4427	5036	4434	4469	2197	2529	5047	4704	3689	5163	3599	4915	2882	3591	2556	3241	1561	3009	1215	1077	1465	2631	4227	4747	2645	3096	5827	6935	4179	4183	5041	4035	2843	5141	3532	1054	3204	2354	1681
L1PA11	1465	1808	1405	1309	1258	1338	1537	1712	1509	1735	1444	1659	1461	1356	1144	774	3170	1998	1520	1909	1367	1376	1194	1466	1808	1721	1269	2531	685	708	710	2058	3894	2487	1434	2191	3018	2617	1015	2614	973	2178	1296	1085	3097	468	6078	1270	480
Tigger19a	1854	2083	1702	1558	1101	1445	1470	1642	1369	1528	1515	1769	2028	2363	1098	1418	2180	2499	1759	2615	1608	2808	1379	2025	1027	1254	876	1695	690	993	679	1287	2063	2452	1248	1383	2747	2526	2743	2456	2145	3278	1058	2626	2564	718	1566	1576	1089
LTR91	131	120	120	171	112	218	181	209	153	181	167	206	195	317	183	188	639	308	292	658	239	281	202	290	10	31	13	0	1	64	25	39	241	198	124	118	365	180	182	235	112	106	30	64	14	0	144	24	22
Charlie1a	2558	2904	2320	2748	1926	2267	2573	2651	2351	2596	2541	2606	4214	3129	1508	2382	4124	3217	2825	3284	2813	2672	2304	2985	3861	3180	2201	3613	1820	2069	2172	2461	7030	4663	3568	4096	5779	5207	4257	4329	6155	4528	2656	4960	2728	1214	3747	1968	1378
Charlie1b	810	843	691	641	523	622	656	697	533	657	597	856	802	396	244	290	894	870	832	857	1201	652	635	902	768	1005	642	1349	767	578	595	715	1668	1694	1363	1244	1984	1077	1013	2293	2449	1187	1076	1561	636	446	1747	533	436
PRIMA41-int	369	330	282	553	466	705	596	828	762	869	493	847	1112	280	784	259	1608	1403	941	942	1785	1086	872	1324	1187	2379	503	653	182	762	775	755	654	351	176	508	355	182	231	372	476	22	412	133	86	213	347	129	114
SST1	291	237	167	227	175	242	279	189	221	266	275	442	601	290	324	927	585	391	524	649	186	250	302	447	34	75	72	90	14	90	87	344	372	58	186	315	80	361	76	201	290	113	77	52	895	103	513	183	123
MER54A	532	548	485	478	515	545	758	854	556	578	403	577	718	453	379	556	1034	780	608	841	1070	617	536	764	143	171	350	595	73	320	290	88	541	600	215	674	1274	1781	1339	1262	1151	2661	373	906	400	304	561	177	222
MER103C	2526	2568	2062	3228	2213	2891	2809	3266	3129	3982	2827	3677	4362	3348	2593	2295	5417	4280	4199	5176	5134	5259	3376	4551	1610	1543	1083	2060	1123	1125	1248	1653	3253	3554	2315	2961	3801	3238	2495	3483	3169	3413	2254	2488	2265	1135	3871	1602	1336
MER51-int	235	250	217	367	271	273	329	381	367	533	263	286	446	216	133	362	838	1039	424	385	578	565	289	654	400	324	190	480	518	521	91	211	492	930	376	372	742	338	734	1171	1945	952	1109	1021	176	160	715	187	258
MER67C	261	260	271	406	273	349	362	423	278	427	305	476	464	66	188	188	214	688	373	372	278	273	210	384	102	196	138	251	229	105	243	244	875	395	322	442	600	734	1019	346	844	306	242	643	622	134	879	303	153
AluJo	51801	45752	37950	45484	35183	42874	61858	64265	58466	69543	59731	74277	58184	56223	38435	38157	63968	47295	51508	59686	58994	64005	41755	58599	38382	41559	24948	40174	27673	29124	25109	28708	66856	53094	40261	45466	98118	78081	73202	69099	74851	88816	49719	78131	46193	20525	37319	38838	27497
SVA_C	395	332	454	179	261	240	662	771	600	754	265	367	532	379	317	267	1723	422	1036	456	520	511	396	521	13766	11541	11490	10362	7562	8653	9426	12228	4771	7137	4289	3862	22662	15834	20150	35319	15046	16691	17875	22943	43914	22042	1228	60034	32082
LTR1D1	151	111	136	155	121	183	150	173	134	146	206	282	299	473	239	9	137	192	573	266	482	512	188	650	77	30	44	48	36	31	56	92	233	43	238	167	265	178	412	138	82	371	19	147	48	16	18	65	25
MamGypLTR3a	203	216	192	313	305	442	399	392	346	473	272	367	448	463	454	406	878	1272	1047	819	625	1147	625	631	155	448	256	317	130	152	96	191	448	487	296	278	468	824	381	427	164	900	134	298	29	107	951	122	49
ERV3-16A3_I-int	3473	2851	2317	5429	3658	6066	4957	5564	4662	5472	4467	6350	11683	11649	5248	6768	6321	6474	6759	8292	7999	8048	5583	8152	2589	2743	2196	2587	1615	2621	1594	1875	6527	6731	3182	4918	10867	8104	2825	4452	3270	4963	2877	2281	2723	745	2525	1617	769
MER34A1	322	279	197	269	195	321	161	240	208	253	257	327	178	98	166	383	450	235	224	144	207	94	159	248	138	181	169	252	290	166	82	151	461	439	356	336	893	360	382	883	287	480	315	564	1105	212	277	170	298
Tigger16a	649	785	466	1528	1082	949	1225	1307	1034	1233	1257	1460	1821	1042	603	324	1370	1706	1017	1345	996	1288	737	969	490	275	244	414	169	226	292	424	1277	845	517	458	940	637	307	813	761	418	494	588	408	208	1085	386	251
THE1B-int	230	282	231	327	375	390	658	687	488	586	517	615	590	2469	613	829	2791	1077	1800	842	1026	950	527	748	2097	2335	1396	1613	1036	1624	1144	1146	15739	5699	4342	12052	3192	4400	2767	4726	4308	3662	2755	3866	4278	1056	13802	1982	1055
Tigger9a	652	551	424	719	644	670	925	909	799	890	697	801	841	345	313	919	822	865	747	810	933	731	525	929	577	430	255	486	181	68	255	113	749	708	403	489	671	567	304	395	607	1158	278	350	187	240	608	202	131
Tigger9b	547	651	513	303	260	306	228	351	287	362	386	462	347	522	434	108	209	623	477	467	385	432	189	353	344	572	270	170	191	167	158	270	435	495	335	547	1195	834	709	1268	764	163	630	421	249	114	129	96	186
MER57A-int	971	866	732	1248	1518	1163	1434	1740	2174	2564	1532	1679	2536	1446	874	1255	1848	3469	2182	2602	2440	2519	1569	2037	945	828	657	2077	739	990	490	1225	2102	2047	1030	1565	3260	2274	3557	2476	2070	2059	888	3632	1867	1218	686	1781	2383
Charlie18a	1693	1669	1232	1042	828	895	998	1228	958	1267	975	1299	851	829	415	362	947	1020	748	962	784	1201	607	1197	539	550	321	448	238	145	344	520	1092	759	541	632	1530	1225	732	859	1013	746	338	681	686	245	419	483	305
LTR16D	593	489	553	397	307	490	509	506	446	503	375	387	575	1381	435	965	775	707	661	1036	638	1438	400	713	160	249	229	99	237	293	13	180	899	370	284	448	920	580	164	220	309	109	464	150	710	192	83	143	72
AluSq10	8030	7052	6070	6339	4819	5968	11218	11607	9895	11901	9136	11605	6313	5896	4582	3912	7869	5624	6370	6660	7335	7587	5075	6897	6833	6261	4652	6401	5393	5529	4775	5088	8120	5840	4717	5302	12832	11695	9257	9205	9567	10532	6889	9934	8768	3924	6412	8317	5312
AluJr	49066	43683	38598	49043	34099	42307	56134	60019	52249	61493	56202	70571	60148	51847	31975	34926	59064	47289	50834	58476	55642	56417	40494	55660	38893	37845	25147	39228	26239	30054	24994	30622	65385	50602	36582	43330	95153	88723	69985	69666	71235	80646	52001	73128	43230	19417	39749	39400	26615
Charlie10	1208	1445	865	1145	574	763	704	808	796	907	696	875	341	568	87	372	698	1328	653	951	858	868	675	654	316	543	157	717	227	326	168	466	985	720	266	426	861	475	324	770	600	1021	224	620	343	518	851	261	325
Charlie11	54	67	70	78	51	72	92	105	43	97	32	77	342	75	3	399	151	133	74	43	48	70	50	128	5	90	0	23	0	0	3	12	23	7	27	74	236	179	17	0	221	3	27	0	0	0	2	62	60
Charlie12	6	0	1	6	0	5	5	0	1	5	0	11	1	0	0	0	0	0	7	0	0	0	0	0	0	28	5	0	0	1	0	4	106	0	8	0	98	1	1	0	246	6	2	158	12	0	4	2	1
L1MEg1	171	193	195	283	229	281	143	189	133	131	130	189	192	259	195	48	384	655	440	444	190	310	171	334	36	224	132	501	59	224	84	158	415	509	244	173	551	313	2	287	206	14	126	1	223	396	783	115	162
L1MEg2	471	477	331	880	569	689	580	699	600	638	648	776	859	334	370	290	911	632	634	793	847	1092	536	702	22	225	51	246	18	12	50	141	515	710	316	233	179	62	407	280	100	79	53	83	226	59	1839	87	64
Charlie17	84	170	159	72	62	150	109	103	97	89	59	100	125	217	71	103	261	260	103	96	148	68	108	149	73	65	115	240	6	63	119	134	235	279	71	100	445	548	306	144	527	86	284	423	481	45	97	242	315
MER110A	209	172	114	257	196	246	368	324	330	492	302	355	388	399	487	300	342	899	399	938	385	591	213	483	59	117	70	2	41	129	19	53	392	493	308	234	311	315	49	155	90	11	80	303	303	40	27	181	125
HERVE-int	2946	2017	2060	885	901	1151	3181	2929	1533	1954	1351	1811	1956	1872	1078	934	1304	1099	648	857	1232	1240	1183	1043	185	345	196	341	148	276	114	172	1030	429	182	466	776	282	749	635	930	1733	623	474	404	259	512	326	433
MLT1L	15206	13597	11916	13186	11110	13771	20402	20266	17130	22646	16456	22228	30427	25288	17554	19082	23891	22474	19926	21590	20354	23374	17108	26215	3276	3493	2615	3439	1489	2693	2133	3898	16529	11561	8312	10195	10145	10738	7664	8129	8603	9567	6803	8137	4995	1514	6216	3621	1864
MLT1H1-int	65	34	36	54	64	71	67	84	50	81	60	98	280	307	139	43	326	170	175	118	167	75	177	233	54	257	57	50	7	126	67	40	55	468	165	97	240	32	103	161	126	34	59	503	250	44	312	113	75
HUERS-P2-int	263	123	102	285	148	145	169	177	191	360	402	492	819	409	618	270	543	683	606	1361	648	224	588	863	7	64	73	268	134	91	16	70	30	215	362	103	880	320	443	863	379	669	733	219	92	1	383	10	3
MLT1E3-int	19	35	34	18	14	14	6	9	12	8	12	19	0	0	0	0	6	97	15	28	20	57	5	8	34	0	25	19	21	19	47	69	71	18	13	20	76	0	0	55	0	0	0	0	32	11	46	39	70
Kanga1	369	390	380	267	160	157	237	215	203	152	150	198	318	333	1263	126	266	338	272	221	257	531	267	420	623	624	344	592	127	356	325	177	453	112	92	73	389	2256	888	885	716	598	266	930	994	50	648	400	835
MamGyp-int	111	143	165	249	127	261	258	221	192	219	172	178	749	5	114	248	337	305	615	298	522	359	553	597	502	194	318	1117	415	484	226	760	824	806	439	688	803	655	1297	770	789	154	104	1179	1067	285	106	507	535
LTR22E	20	28	11	90	81	95	114	98	109	103	108	136	245	346	87	114	89	149	250	191	156	112	193	172	525	737	651	743	516	724	468	1089	42	15	46	128	745	1443	557	1196	894	1083	1736	979	296	306	58	466	373
MER76-int	34	19	37	43	44	44	21	44	51	68	42	18	8	0	19	0	133	88	144	75	55	7	60	171	50	194	235	179	153	196	383	121	49	50	46	42	687	902	130	467	650	1014	618	215	87	158	1	462	18
ERVL-B4-int	1038	871	882	2727	3846	3601	3696	4700	4215	5048	4316	5560	7264	3867	3213	2736	5127	4322	4303	5068	4274	4234	3302	4044	712	1230	624	755	626	1328	399	590	3671	2695	1568	2862	2983	2507	1172	2092	1813	1823	1784	1409	1400	227	3298	654	266
LTR22B	9	20	14	15	9	11	15	31	17	18	6	3	132	1	0	221	33	5	96	0	435	26	40	48	71	242	55	61	11	46	10	29	377	124	55	255	98	189	4	523	106	7	13	112	32	0	315	99	13
LTR22C	0	0	0	0	2	3	7	0	1	0	13	22	0	0	0	0	69	0	8	18	0	0	0	3	49	91	19	0	20	1	69	31	101	0	102	0	27	0	187	136	44	0	0	0	0	52	0	7	2
MER81	455	345	330	346	330	459	336	404	347	451	349	436	696	590	354	309	920	546	906	1009	891	819	757	1305	230	308	274	405	369	231	211	296	745	497	630	492	720	582	585	759	512	703	264	625	679	214	466	292	178
MLT1H2	11722	9030	10290	4461	4497	5277	9669	10601	7233	7281	7716	10582	7889	7952	4048	5249	5544	7779	6203	10477	9019	9986	7743	11671	740	1301	1203	1425	746	674	710	1181	4129	3655	2363	3145	3154	4710	2007	4849	3061	3537	1963	4081	1961	224	1929	526	465
UCON23	77	74	79	23	47	90	54	57	99	79	51	58	121	180	90	158	62	228	138	282	145	115	108	163	85	39	69	247	79	126	97	79	190	195	78	57	67	86	15	57	44	329	63	44	49	44	0	75	55
MST-int	12	16	10	19	19	27	25	13	23	27	18	17	11	25	4	1	41	30	77	23	27	80	67	26	15	152	50	15	15	30	152	25	393	111	28	128	155	169	32	137	192	30	161	39	60	84	156	50	16
GSATX	10	2	0	6	9	28	6	37	24	22	10	24	123	0	1	0	10	0	124	69	118	2	41	19	1	49	0	0	0	1	4	0	16	68	1	0	0	0	3	1	0	0	0	0	27	1	0	15	6
HERVH-int	27563	30545	29725	38830	45395	51743	73333	72334	59032	77762	41038	52634	53371	58870	36381	36482	54243	54009	49654	64236	72668	73345	52171	73590	30100	37944	35836	54768	38388	48608	34958	60909	76024	67147	44934	52526	74266	64755	57068	49248	69154	71949	38825	63263	124402	30997	9317	82690	46028
AluSg4	10570	9665	8257	9864	7558	9558	16278	16254	15812	18858	15688	19260	10468	9300	7455	7646	11901	7866	9709	10129	12137	12790	8582	11545	9231	8556	6235	8520	7034	7102	6456	6720	12861	9226	7396	9184	17279	15979	12958	12669	13983	15731	10327	13797	11143	5081	7906	10669	6765
LTR23-int	16	5	11	7	5	6	8	5	16	9	6	22	203	1	7	0	62	0	26	0	49	65	2	77	96	29	3	66	20	7	4	24	78	28	78	80	103	2	17	20	72	14	46	152	0	16	31	39	0
LTR88c	125	90	89	138	135	96	153	136	94	140	106	113	251	76	127	163	139	391	213	478	261	428	253	223	128	98	73	73	35	20	57	16	385	198	107	404	433	384	191	322	146	426	76	276	157	7	210	51	55
MamTip1	597	841	961	538	455	635	690	802	803	873	583	752	701	456	651	463	1395	1201	1193	678	1333	1551	814	1073	93	133	109	203	49	307	108	214	511	308	274	458	535	165	466	876	931	500	545	392	279	97	225	419	128
MamTip3	613	469	351	376	505	519	448	461	414	504	418	570	787	577	175	357	730	526	511	553	606	843	494	875	92	144	172	221	80	27	213	134	714	599	383	456	286	311	103	311	96	549	150	215	112	35	124	51	92
MamTip2	3882	3261	2702	4219	3669	3749	6313	6672	5530	6915	5551	6579	8275	7909	4731	5316	7585	6845	5299	6939	7302	8303	5240	6653	699	1162	1069	1100	503	936	693	1029	4340	4058	2673	3193	4021	4053	1871	2951	2601	3792	2087	2091	1169	515	2713	1155	877
THE1C	3896	3092	2935	7396	6560	6355	13484	13181	8914	11790	8297	10266	6172	7088	4988	3920	5055	3791	4186	4183	4819	4996	3361	5377	1265	1294	1186	1267	679	851	557	943	5852	3498	3011	5053	3427	3036	3185	3206	3834	3095	1670	2207	1664	407	6299	1021	748
THE1B	3282	3007	3110	6999	6810	6579	13677	13290	9270	11281	8718	11342	7469	8019	6611	6355	9259	5927	7531	6382	6393	7029	4654	6835	4138	4787	3661	3374	2315	2980	2664	3254	17109	9511	8284	13692	10293	10614	6884	9094	8691	7744	6265	7687	6454	2733	23772	4608	3309
THE1A	586	588	516	1070	989	952	2080	2033	1357	1578	1388	1733	1168	1319	1299	1005	2646	764	2198	1304	1417	1460	912	1153	1061	1398	1258	711	754	1457	828	1088	7465	3496	3696	4842	3235	2641	2688	2659	2138	2721	1564	3014	1658	774	9961	1512	1034
MER84	138	103	136	106	112	130	140	202	118	211	177	236	213	442	15	6	109	245	203	8	208	299	150	96	44	52	8	60	147	20	112	107	88	137	179	132	406	116	90	123	210	600	2	313	89	30	96	116	133
MER4CL34	631	380	430	1076	871	1048	1419	1483	1138	1407	1121	1564	1446	1259	1123	1440	1623	1485	1396	1134	1402	1977	1086	1788	127	419	322	121	134	177	115	150	858	893	773	410	1098	652	882	833	571	1315	223	799	190	167	679	232	69
LTR1	118	139	141	143	91	153	104	141	120	136	84	124	509	392	79	102	399	446	389	348	301	353	142	363	36	49	47	82	105	27	56	63	545	378	207	275	327	135	213	299	313	71	115	103	140	11	2228	87	57
HERV1_I-int	36	122	135	67	54	82	63	47	95	155	151	228	7	193	3	0	4	106	383	339	148	240	18	203	0	52	34	2	49	1	36	20	26	0	22	39	0	50	522	178	0	0	7	2	1	92	214	0	89
LTR53B	94	97	96	189	247	255	432	405	296	430	266	300	344	270	205	276	217	231	327	473	352	616	207	348	63	23	38	13	72	232	14	112	272	210	87	196	176	40	262	207	164	60	0	118	11	0	114	4	1
LSAU	10	8	8	13	2	0	4	7	8	8	8	4	20	100	2	5	66	62	45	31	60	23	20	30	1	15	7	0	0	0	0	0	2	12	16	50	17	0	0	32	3	1	0	0	72	0	0	31	0
L1M4c	2063	2822	1961	2962	2325	2204	3302	3508	2923	3165	2605	3168	5768	5081	2893	3704	1654	2671	1953	3391	2281	3327	2332	2694	4533	3267	2878	3579	2316	2733	2157	3502	4596	4209	2291	2302	5921	7663	3786	4458	6299	3266	3188	3808	3674	4184	3658	4147	5491
L1M4b	1573	2270	1331	3625	2517	3534	5015	5559	5174	6292	9491	8861	6059	9796	3683	5643	6703	12041	8110	16373	9747	10283	7799	9336	1697	1962	1099	1860	1173	982	1238	1366	4759	3290	1444	3558	6126	3962	4721	4902	6375	4666	2443	5415	3213	1125	5735	1826	852
LTR109A2	0	2	3	2	1	0	0	7	7	3	0	0	75	0	0	0	1	0	25	0	0	0	5	0	0	0	1	0	0	0	0	0	0	0	0	0	54	0	0	0	0	0	0	0	0	0	0	0	0
Plat_L3	1178	1405	1208	1238	1038	1499	1391	1410	1282	1530	1172	1423	3106	2941	1459	1411	2404	1927	1958	2499	2227	2464	1592	2132	931	862	710	1522	949	556	615	1092	1925	1689	1072	1237	4076	2439	2980	3366	2829	2534	2175	2589	1772	873	1141	1558	875
tRNA-Pro-CCA	0	0	0	0	0	0	0	0	0	0	0	0	0	0	0	0	0	0	0	0	3	0	0	0	0	0	0	0	0	1	0	1	2	4	19	0	0	0	0	0	0	2	0	0	0	0	0	0	0
tRNA-Pro-CCG	0	0	0	0	0	0	0	0	0	0	0	0	0	0	0	0	0	0	0	0	0	0	0	0	0	10	9	4	0	23	10	11	0	1	0	5	0	0	86	0	25	99	0	111	4	0	0	0	0
X6A_LINE	83	97	69	155	134	182	110	100	62	97	104	131	229	109	23	187	40	200	34	143	203	151	119	218	36	26	13	6	4	44	61	35	158	28	43	13	8	66	1	2	14	137	0	46	66	19	14	75	33
LTR06	9	5	1	46	50	64	83	61	63	74	65	105	62	0	108	1	167	34	163	88	91	149	56	151	105	188	146	250	97	164	168	146	135	85	123	47	313	302	131	376	364	482	193	466	217	30	7	451	187
MER101	273	272	260	425	288	466	569	668	390	498	456	432	389	672	497	460	413	222	342	700	609	351	436	371	31	28	1	14	12	32	5	98	260	323	159	103	185	78	5	52	13	11	29	86	56	0	5	19	1
HERVL32-int	27	49	38	38	23	106	52	58	74	73	54	39	211	66	0	0	423	32	191	3	63	0	11	56	28	0	0	22	0	1	13	44	137	0	69	9	183	0	0	0	0	5	1	0	0	0	9	0	0
L1PREC2	3735	4836	3892	3749	2853	3750	3954	4536	3811	4129	4228	4436	3339	3906	3785	2690	5140	5222	3607	4570	3724	5804	2948	3747	3493	3016	2062	2750	2125	2858	1463	2325	12923	5753	3775	9047	6669	6170	3519	4166	4828	3718	3096	3359	4466	1749	12892	3368	1742
MamGypLTR2b	129	123	84	111	102	185	134	154	153	185	130	105	51	573	103	7	366	166	203	223	242	215	183	363	170	195	218	432	43	103	126	179	533	190	113	259	400	304	93	290	423	119	368	535	551	62	365	199	143
MER105	254	245	221	181	119	207	140	167	182	201	159	208	362	628	35	244	442	155	321	330	299	465	215	265	164	123	121	187	35	203	75	225	364	353	252	312	215	401	369	456	90	625	204	277	208	31	178	152	49
MER104	376	430	304	410	248	314	286	293	303	391	315	324	592	323	246	199	335	374	327	380	417	673	412	298	561	608	465	725	180	516	396	556	524	956	622	356	1370	1043	869	752	926	1125	659	1278	253	164	1172	454	228
MER67B	1312	992	1091	4791	1653	2032	10990	8943	9676	12893	3737	5362	6481	5832	3995	3917	14499	12771	10782	17309	14548	12962	11854	17526	214	571	401	248	177	228	150	459	6172	4726	3057	4336	5588	4550	2264	7110	3396	4608	3277	2034	752	49	862	363	426
U13_	114	64	85	91	123	146	65	94	152	330	88	141	159	448	125	238	191	273	223	459	265	341	171	223	39	147	99	124	86	152	173	59	328	247	233	243	223	178	128	143	347	171	279	209	176	156	240	116	61
tRNA-His-CAY_	0	0	1	0	0	0	0	0	0	0	0	0	0	0	0	0	0	0	3	0	6	0	0	0	0	0	5	0	0	0	0	0	13	0	1	13	1	0	0	6	2	64	0	0	49	13	0	10	0
HERVK-int	70	93	81	97	112	133	207	245	164	410	127	152	514	798	50	63	425	122	660	287	411	417	367	390	2048	1418	1462	1146	885	1306	1201	711	6499	947	1494	1062	1372	1095	2612	2288	3460	815	1705	1499	2512	1668	810	2378	1405
AluSx4	12640	11713	10089	11714	8874	10365	18021	17892	15830	19194	15202	19189	12700	10612	8079	8383	14758	10939	11943	12767	13677	13631	9670	13571	12721	11198	8700	11535	10220	10286	8827	8776	17914	13363	10877	13395	24779	22695	18548	17875	21099	24364	16549	22632	14427	6986	10652	14538	9230
LTR38A1	10	2	5	9	16	12	18	15	20	31	5	9	74	0	52	0	6	0	46	0	4	61	10	0	8	59	0	7	13	0	4	24	47	101	10	67	20	1	178	0	70	0	12	1	1	1	124	25	0
AluYf5	2487	2311	2006	2156	1640	1983	3799	3723	3352	3934	3179	4066	2326	2071	1469	1405	2543	1862	2174	2299	2496	2589	1767	2362	2332	2250	1735	2068	1970	1928	1731	1727	2832	2092	1752	1997	4811	4121	3346	3255	3496	3772	2720	3597	2778	1160	2411	2663	1667
AluYf4	4665	4311	3744	3965	2911	3596	6819	6644	5893	6985	5814	7249	4235	3675	3075	2531	4615	3490	4066	4307	4690	4861	3263	4499	4391	4238	3275	3996	3801	3582	3222	3187	5022	3636	3030	3379	8526	7402	5920	5774	6162	7369	4589	6394	5220	2262	5102	5111	3173
AluSx3	46601	40738	33114	37149	27010	32795	59993	60783	53151	66095	36159	45112	32451	27411	19831	21863	28560	22994	23290	26663	29699	31184	20875	28129	20999	19354	15125	19909	16146	17475	14113	15267	31508	22570	19139	21000	51243	43570	39153	37514	39648	47041	26917	41197	25656	11972	21220	23546	14640
L1HS	288	463	623	429	462	561	858	1064	586	667	542	707	1026	1348	1212	634	2971	919	1747	1166	737	1087	642	813	1340	763	865	907	525	657	515	754	3268	1481	1059	1912	1434	1117	849	1095	1174	1213	664	591	2741	518	9571	1779	724
Charlie1	600	704	551	517	375	405	419	460	364	430	357	419	760	350	330	370	896	915	531	1115	765	386	495	602	1698	1118	719	1658	817	487	1038	1520	2033	1391	697	1000	2683	1976	1086	1308	1606	2086	766	1941	2951	1034	1104	806	688
MER21C	2019	2321	1817	2708	1882	2221	2627	2845	3366	3449	3285	4033	5471	2367	3426	3173	3019	4194	3699	4999	4275	3645	2539	3179	1637	1947	1895	2260	1527	1891	1774	2166	5907	4071	3131	3495	4790	7489	5067	4361	5257	6743	3456	3948	2277	1152	4564	1878	1766
MER21B	1495	1435	1326	1217	988	1153	2069	1853	1747	1920	1693	1997	1789	1774	1949	1193	3409	2290	2339	2357	2895	2549	2117	2757	2174	2441	1508	1499	1747	1043	904	1387	6011	2911	2802	3128	3780	3432	4631	3412	5321	5455	1188	3279	1737	697	2870	1590	916
MER21A	5811	5545	4652	3673	5083	4931	11400	14095	12705	15236	9104	13109	10101	9437	7127	5298	8541	6338	4984	6096	8130	9322	5401	8171	1875	1740	1565	1610	1590	1314	1393	1974	5931	4714	3506	4954	8409	5864	5026	6920	6196	12053	4806	5916	3715	1170	11110	2064	1156
tRNA-Ser-TCG	0	0	0	0	0	0	2	0	0	0	0	2	0	0	0	0	0	0	0	0	0	0	0	0	0	0	0	0	0	0	0	0	1	39	4	0	0	0	0	45	0	0	0	0	0	0	0	0	0
Charlie6	5358	5034	3725	4778	3314	5885	4821	6189	3662	5341	2987	4651	6171	7153	2982	4608	4949	3311	3298	3361	3529	5101	2628	2923	6065	2840	3019	6532	3261	8123	3536	3673	2099	3183	1706	2176	2330	1511	2502	4121	3317	2982	1986	2478	3517	1346	646	4434	1632
MIR3	43845	40622	32823	34154	30637	41131	41136	45656	41057	48511	41087	50085	66861	59063	35652	41734	60167	55847	50693	65997	61379	64427	42698	61102	21893	21539	15025	23732	15322	16684	15403	20925	46970	41918	26714	31367	50035	45545	35227	42854	41533	49137	27957	41959	38402	14033	29823	25400	17786
L3	32513	30846	23785	29260	24328	30120	38644	43383	35884	44505	35385	42489	46043	42105	23867	24098	44155	39213	34201	41872	42452	46342	31306	41759	14983	15608	10955	17693	9695	12747	10021	14322	37168	34517	19432	23858	35002	35261	24091	31461	30793	32390	20887	26401	16064	7481	21252	12878	8663
Charlie21a	432	593	438	311	349	284	324	366	346	359	268	370	533	233	208	240	335	610	323	1052	717	177	398	571	103	196	218	190	91	223	103	205	567	462	296	152	645	834	229	914	826	1943	1150	1070	272	416	522	297	666
ERV24B_Prim-int	796	852	719	990	822	977	1491	1456	912	1266	1031	1117	1150	734	608	1332	989	1994	1221	2227	1901	2117	1274	2159	151	211	329	136	15	146	139	104	749	1275	863	653	822	884	293	743	483	838	496	549	82	73	28	108	69
MER68-int	787	936	675	1364	840	1255	1829	1751	1240	1478	1910	2621	1855	1574	1221	876	2466	1941	1563	2883	2184	2939	1282	2189	274	471	360	549	354	158	223	271	1022	1041	657	739	3280	3347	1307	2327	2284	1690	1904	1137	248	288	49	1248	227
L1M2a1	830	600	714	1676	1651	1861	3398	3149	3527	3756	3056	3555	5762	5080	2688	3789	4292	3115	2991	4054	3018	3278	2870	3947	240	385	310	103	166	155	273	306	3407	2357	1852	2527	2064	1665	851	1895	1260	2128	796	880	160	20	697	201	39
MER88	1	5	4	3	4	15	7	17	7	22	10	24	0	37	1	0	0	8	5	0	9	22	6	0	3	44	2	24	34	24	38	0	22	27	10	83	147	284	7	69	18	0	0	30	279	114	0	87	0
LTR75_1	26	28	43	29	33	15	26	52	34	25	38	35	0	6	1	22	126	57	74	0	69	0	35	45	25	148	68	307	58	14	76	188	148	73	111	95	358	35	412	224	266	96	221	108	175	29	15	100	62
MER57E1	199	281	171	106	43	54	93	90	77	113	50	56	566	10	188	7	298	7	139	281	177	58	24	51	69	62	42	81	90	24	101	64	55	270	95	93	306	186	171	201	340	374	187	196	13	0	220	99	4
MER4A1_	90	83	84	200	187	154	200	252	272	318	326	314	391	427	1163	95	267	404	125	273	150	210	170	202	103	154	257	104	127	210	163	210	228	152	181	49	163	454	233	179	490	124	213	187	527	227	78	296	380
MER57E3	26	9	10	14	16	6	28	30	37	37	22	24	0	183	31	3	153	24	151	42	100	42	86	21	314	211	214	417	259	188	175	402	1035	423	408	548	733	988	128	482	662	253	548	1020	668	141	73	368	211
HERVK14-int	4522	3690	3466	5264	4271	4723	8590	8887	10306	14853	6856	8034	12358	14237	7690	6420	8209	6735	5770	8069	8171	7883	6766	8684	734	918	688	662	711	978	622	1002	4018	3062	1609	2466	3782	3818	2463	3910	2380	2061	2159	3589	1359	322	621	711	510
L4_A_Mam	1680	1720	1348	2739	1620	2112	3971	3891	3242	3796	1858	2051	3751	4560	2124	2161	5235	4542	4240	6264	4322	3783	2868	4095	2139	1949	1898	2272	1025	1453	1491	2295	5021	2759	1817	3150	4109	3651	3164	4093	4212	2174	2297	3266	1314	836	3197	1115	889
tRNA-Ser-TCA	0	0	0	0	0	0	0	0	0	0	0	0	0	0	0	0	0	0	0	0	0	0	0	0	0	0	0	0	0	0	0	0	0	0	0	0	0	0	0	1	0	0	0	0	0	0	0	0	0
MER85	495	396	382	617	609	471	878	808	399	508	407	551	811	639	446	758	932	1037	616	1084	744	857	542	994	382	331	100	288	210	219	145	220	575	414	313	200	635	829	336	465	503	263	466	229	359	239	211	345	132
LTR16A2	327	304	296	398	400	405	494	580	476	676	543	566	1099	768	1054	434	1739	518	998	1014	823	1161	784	1090	135	190	181	345	166	91	138	180	365	367	286	621	731	988	184	776	439	921	232	1127	383	175	1688	453	160
LTR16A1	2458	1858	1575	2128	1910	2333	2881	2759	2189	2840	3050	3314	5170	3574	2315	2359	3786	3092	2779	4180	2931	3347	2316	3238	815	1063	1039	911	766	823	1102	956	1946	1287	796	1218	3024	2633	1411	2005	2539	3425	2347	2762	427	557	1323	1012	523
LTR19-int	10	25	17	10	12	21	11	15	18	23	8	12	31	13	27	17	32	25	51	178	123	33	39	36	238	126	76	120	55	94	41	34	216	220	117	304	411	100	122	95	263	47	207	421	237	8	58	11	44
LTR71A	33	20	23	32	14	26	28	17	18	52	32	23	1	0	0	0	13	51	37	55	30	138	74	3	90	191	51	26	0	82	72	5	102	44	38	142	152	5	1	332	135	90	74	54	1	32	278	51	3
LTR71B	395	266	178	531	290	449	181	192	176	194	254	322	42	215	38	141	44	276	77	273	332	209	160	140	48	47	110	58	32	11	13	169	109	29	87	166	156	173	27	161	63	548	24	243	215	11	52	45	9
Charlie9	406	456	405	226	256	310	245	262	299	356	308	320	426	923	30	302	379	577	480	584	418	305	339	400	989	744	349	1600	1447	1119	1149	928	541	785	372	658	973	871	1121	1733	2789	1759	942	560	2548	401	851	1322	725
MER61C	39	42	39	14	27	35	39	44	39	53	49	39	3	9	102	33	320	137	209	45	62	51	26	21	66	2	9	38	31	3	49	3	850	131	310	635	280	223	1179	83	686	904	154	637	457	5	2013	45	23
MER61B	325	447	350	699	571	677	1025	1026	765	1021	795	1079	494	789	645	807	682	538	576	719	1037	1184	710	769	60	154	79	180	52	210	68	89	260	526	290	261	549	790	186	76	254	525	111	187	237	19	330	175	60
MER61A	640	584	473	1024	1263	896	1763	1863	1330	1690	1652	2222	1219	1919	887	930	788	1038	844	1393	1277	1662	1142	1658	137	199	196	414	226	274	73	229	608	898	397	360	1004	902	368	711	640	128	221	717	832	118	639	494	322
Tigger5b	1114	929	802	924	751	861	772	692	853	979	686	794	1220	1862	658	812	595	980	985	1037	1025	941	610	1216	904	989	485	895	607	717	750	1060	1635	1447	793	912	1371	1532	1623	1856	1525	1106	760	1351	1012	339	617	817	544
MER61F	26	18	28	50	26	49	32	41	21	38	38	37	35	0	11	2	225	47	136	19	99	396	15	62	42	6	8	0	0	0	1	1	4	181	49	7	10	89	7	202	27	1	13	0	23	18	102	12	3
MER61E	8	6	20	31	26	23	50	26	48	64	21	27	8	1	101	5	121	193	183	46	22	19	12	156	1	74	105	10	11	65	98	46	75	141	66	147	261	131	102	50	2	0	86	15	14	4	125	67	1
MER61D	161	257	158	313	269	465	167	204	238	304	360	561	194	63	79	91	15	446	422	128	359	555	313	176	13	0	30	18	19	17	12	42	190	259	19	78	96	74	146	9	77	16	16	0	194	5	430	26	13
MER136	33	39	27	57	58	42	87	103	59	58	37	40	57	53	70	108	86	1	73	217	96	167	122	106	1	0	13	0	1	32	7	11	38	37	11	25	66	42	45	1	70	2	0	59	0	0	0	0	0
MER75	122	287	172	250	157	160	339	333	336	356	245	282	837	253	231	157	274	546	209	312	275	583	260	497	114	176	111	209	53	189	194	135	584	344	182	428	318	386	460	372	149	361	127	277	423	71	333	198	271
MER76	623	477	480	827	618	590	893	862	697	852	625	935	765	474	381	883	1626	1126	955	897	968	1302	830	1123	25	290	115	193	50	149	123	381	1078	478	272	528	610	295	537	400	489	58	321	208	177	4	597	3	227
MER77	1391	1350	1196	1188	1183	1372	1090	1418	1157	1368	1052	1761	1910	942	1524	1882	2424	1860	1249	2409	2093	1708	1738	2233	417	865	668	747	334	418	718	670	1619	1320	591	751	1208	1450	463	1259	1581	1070	522	729	673	135	2148	433	514
MER72	656	617	455	690	424	526	712	625	524	703	309	350	736	1080	593	417	1797	635	1075	1254	864	1095	809	698	1105	2943	1470	1535	463	639	605	943	3147	6159	587	2808	4168	4611	2780	8322	7017	5778	4404	7672	1708	400	83	1447	1688
MER73	1585	1255	1065	2381	2285	2163	4869	4652	3738	4254	3958	5033	4402	3571	3825	2657	2170	1984	1800	2792	2955	2235	1586	3029	119	221	187	75	99	160	171	243	1157	735	881	1048	943	852	379	995	970	868	343	685	99	53	218	266	58
L1MC5a	12976	13547	10921	11124	10094	10357	13013	13905	11244	14042	15023	16895	22296	19096	11898	11595	21582	22074	18470	22798	17559	19700	12995	19993	6939	7647	5433	8668	2499	5317	4362	6724	15100	15017	7276	10014	16360	14393	9174	13419	12864	12390	6771	10821	7872	2949	7055	5517	3854
Helitron1Na_Mam	54	56	34	117	59	76	63	76	103	102	61	78	67	35	58	134	58	38	204	89	85	130	62	97	124	69	60	77	35	6	23	67	405	134	44	76	156	240	145	1	63	8	35	82	0	16	339	15	49
LTR12C	26996	25629	21478	28522	26475	26915	47926	44402	33221	41771	35711	43093	42029	39382	28493	24333	54157	31169	38601	40872	47238	49866	35539	50243	10689	13577	16599	11851	11857	12412	11597	17684	36012	28589	18266	23750	31780	32646	21486	38883	24413	28944	28302	20446	32352	3814	87823	12475	6908
LTR12B	467	430	331	319	345	386	765	764	559	677	558	731	584	499	664	414	1494	785	984	757	866	964	671	881	255	617	457	263	297	306	311	575	1294	659	350	525	749	900	283	677	466	606	575	552	1104	134	2644	341	155
MER61-int	607	472	399	705	762	618	1176	1477	1234	1299	1402	1651	1669	1050	720	454	1161	645	1275	1504	1514	1563	798	1377	272	512	473	836	768	344	505	302	3014	1431	718	1151	2413	1589	1562	813	1896	1108	296	537	2291	496	2654	878	702
tRNA-Ile-ATA	0	0	4	1	3	3	2	1	0	0	2	2	0	0	0	0	0	0	0	0	6	0	11	19	0	0	0	25	0	0	0	0	17	0	25	0	0	0	2	63	3	0	0	0	0	1	5	1	0
LTR12F	310	262	224	600	554	600	659	687	536	744	452	552	656	781	539	355	870	317	801	376	460	467	613	454	691	1356	2384	1497	1356	2109	2843	2981	655	481	341	692	3229	2951	2062	5429	3660	5641	3762	4102	2504	516	1438	693	937
LTR12E	2763	2828	2333	2386	2389	2549	4888	4386	3340	4035	3602	4393	3484	3308	2441	2027	6522	3936	4846	4810	5628	5809	3907	5547	1424	1637	2119	1606	1471	1413	1535	2189	4198	3521	2064	2326	2968	3357	1710	3664	2163	2299	2765	1857	5153	635	10440	1967	800
LTR12D	3299	3360	2700	3158	3114	3172	6948	6352	4971	6020	5768	6881	7064	6370	4663	3206	10828	5449	7430	6205	7476	7697	5262	7070	1746	2998	3429	2564	1666	2389	2653	3254	7787	6813	3474	6957	7323	8220	4253	7909	5459	4051	4525	4087	7053	789	23656	2722	1261
tRNA-Met	5	23	19	35	24	42	42	22	24	26	37	32	0	66	34	92	2	0	19	82	23	14	29	12	0	4	23	2	0	4	13	14	0	0	0	0	0	8	0	62	3	0	0	0	0	0	1	32	44
HERV30-int	3	3	1	5	10	8	4	7	8	6	5	14	11	4	37	14	142	25	35	73	49	23	24	6	7	55	14	9	22	12	2	7	69	17	13	60	153	85	5	9	13	7	0	37	19	0	21	80	0
tRNA-Ser-TCY	0	0	0	0	0	0	0	0	0	0	0	0	0	0	0	0	0	0	0	0	0	0	0	0	0	37	0	0	0	0	0	0	244	149	57	104	80	13	0	2	29	0	0	0	0	0	0	7	0
U13	15	24	17	31	14	19	34	32	32	24	21	42	166	74	3	0	38	18	41	6	11	77	25	5	54	30	29	76	10	33	12	85	33	56	40	71	41	61	284	190	123	3	87	35	91	57	0	55	53
LTR47A2	54	32	20	183	25	49	42	61	79	92	40	53	703	324	174	137	110	63	85	61	57	287	14	201	0	97	13	111	11	111	31	15	123	59	57	10	354	142	374	42	128	2	4	0	10	1	94	8	1
LTR40a	814	927	762	1615	1029	1183	1689	1661	1355	1473	1717	2019	1785	882	1009	647	1434	2234	1204	2241	1734	1685	1094	1942	285	327	262	408	234	227	241	523	1447	1205	451	722	1293	1391	799	648	951	498	318	654	349	62	1043	393	232
LTR40b	167	182	140	427	260	366	471	490	468	592	489	522	1055	764	242	313	856	541	662	612	512	423	454	455	128	189	188	567	140	356	202	370	537	294	281	262	1154	966	1399	908	818	461	583	580	325	132	552	322	210
LTR33A_	943	652	670	1018	1027	1210	2085	2373	2056	2933	1111	1518	1683	2131	854	1688	1767	1135	1346	1619	2206	2049	929	1251	341	318	154	367	134	79	112	591	1283	1075	688	944	1635	1815	495	1302	489	725	876	677	624	34	445	196	104
LTR12_	1932	2109	1604	1790	1701	1609	3646	3003	2383	3129	2979	3445	3211	3286	1940	1396	6443	3056	4391	3687	4025	4872	2859	4356	2264	3521	2327	1586	2504	2206	2341	2998	3960	3169	2123	2823	5201	5571	2470	6491	2771	2856	6574	4512	4868	693	9339	1525	777
L4_C_Mam	3112	3224	2799	1954	1456	2108	1466	1803	1385	1610	2019	2529	3844	2705	1878	2166	3920	3213	2685	3788	3863	4201	2487	3092	1017	1050	792	1754	575	905	740	1439	2258	2112	1290	1553	4875	3500	2853	2341	3476	3637	1787	3309	1042	683	2321	1070	964
Eulor9C	27	24	14	28	14	17	28	30	34	34	12	18	37	102	1	0	121	99	39	71	52	91	14	49	4	11	49	24	12	1	12	1	227	140	161	216	190	22	0	57	38	7	1	1	0	0	141	29	8
Eulor9B	18	21	14	29	21	44	28	23	34	46	31	26	129	79	2	0	26	149	99	163	27	47	9	37	45	41	22	0	5	8	19	14	21	99	0	19	81	29	0	0	0	1	34	0	0	6	3	0	0
tRNA-Met-i	1	2	0	3	2	5	0	0	1	3	0	6	0	0	0	0	0	0	0	0	0	0	0	22	0	0	0	0	0	80	0	0	54	6	4	10	87	73	25	45	14	5	8	1	0	3	33	14	0
MER123	14	34	16	30	16	18	14	29	24	17	9	23	65	11	38	95	0	17	38	62	23	0	14	7	29	0	19	37	22	39	7	65	34	1	22	0	34	1	0	35	27	35	38	5	82	35	0	82	17
BSR_Beta	1078	863	755	782	769	1163	744	802	519	788	651	878	1904	751	1143	796	2463	2009	1368	2243	2414	2031	1553	1715	3989	3090	2348	3092	2814	3191	2897	3640	1431	2928	1546	2047	8347	7564	5223	5634	5547	7681	8476	6668	6893	2509	26	5111	3843
LTR2	925	950	735	939	636	602	909	999	753	823	733	901	808	884	661	458	725	1015	1020	1166	1015	833	889	1016	472	327	583	685	679	539	285	510	2410	883	565	1054	1495	965	1230	1650	1080	2786	722	1766	900	84	2015	611	320
MER2	2281	2625	2161	3642	2840	2950	3470	3730	3728	4004	3203	3582	4679	4333	2345	2674	3883	4365	3000	4128	3441	3675	2566	3890	3669	3108	2779	3973	2377	3255	2479	4237	5435	5492	2986	3390	7693	8016	6273	6951	9283	8164	5156	6926	3503	1517	3981	3525	1547
MER3	1648	1908	1567	2144	1588	2224	2275	2280	2202	2624	1804	2432	4137	3606	2009	3181	2534	2701	3071	3468	3039	3522	2461	3486	3503	3163	2006	3829	2443	2123	2450	3020	5122	4846	2725	3451	4843	6688	5960	4939	5304	5863	3462	6813	6134	2153	2497	2764	2261
Arthur1C	204	210	174	168	141	155	146	121	213	180	159	190	243	489	164	450	443	522	448	502	426	356	232	491	145	72	101	99	48	6	48	155	741	272	125	269	290	396	79	238	137	370	14	181	98	12	723	43	90
HERVL74-int	70	85	67	129	118	173	233	173	191	200	212	233	1030	169	586	45	77	469	257	43	234	432	340	279	60	189	88	99	126	0	82	89	244	148	62	140	397	441	140	252	503	391	258	689	59	11	649	154	61
Arthur1A	132	111	152	108	245	247	251	276	266	303	284	318	617	508	149	422	259	150	256	475	261	424	229	259	205	70	42	53	71	131	81	138	466	457	168	235	296	158	360	305	296	64	82	148	274	76	671	67	83
HERV1_LTRa	4	1	0	16	0	4	3	4	2	4	5	2	0	0	155	0	0	0	17	0	0	0	0	0	72	19	36	93	64	109	20	91	269	2	2	2	65	0	35	358	134	162	28	1	327	91	13	111	122
HERV1_LTRc	7	12	2	11	12	6	11	13	11	18	9	25	0	113	4	29	0	0	0	4	0	30	0	26	0	1	0	0	0	0	0	0	0	11	0	69	1	160	64	0	0	3	2	0	10	0	28	0	12
HERV1_LTRb	1	0	1	0	0	3	0	2	0	0	0	0	0	0	0	0	14	0	0	0	0	0	0	0	73	66	55	101	93	107	28	46	9	42	6	9	345	207	64	137	22	26	9	362	72	33	0	0	38
HERV1_LTRe	11	14	6	16	11	16	31	35	23	40	22	16	0	8	4	0	0	0	32	0	22	38	24	55	0	0	0	32	18	0	0	0	0	11	9	0	2	0	0	0	0	0	1	0	74	0	0	0	0
HERV1_LTRd	0	0	0	2	0	0	0	0	0	0	6	1	0	0	0	0	0	0	7	0	0	0	0	2	0	0	0	0	0	0	0	0	0	0	0	0	0	0	0	0	0	0	0	0	17	1	312	4	0
MER4-int	1104	955	798	1135	1052	1216	1330	1495	1212	1611	826	1327	2249	2047	1166	1718	3777	1523	2075	2978	1877	2382	1364	1804	12374	8599	5928	5416	1885	2941	2764	7298	4636	4320	1771	3106	9668	5217	7942	12826	5323	6386	9735	6959	3021	971	5260	1523	1002
Tigger4b	953	1206	774	963	848	1091	965	1016	904	1200	783	1068	2152	1137	444	1412	1255	1510	1182	1424	1358	1364	917	1040	933	867	483	1061	342	749	666	759	2539	1564	882	1218	2047	1674	1294	1458	1499	1134	936	2266	1660	376	3643	1152	378
MER106B	159	112	108	126	77	122	176	152	132	156	164	139	121	159	68	70	483	242	239	239	128	106	160	205	105	458	323	240	149	137	115	76	431	453	221	202	1141	741	248	160	122	58	347	319	51	51	407	165	52
MER106A	573	567	452	874	1148	634	767	780	484	613	975	1354	903	975	452	407	757	1154	1078	961	1011	889	858	1544	95	162	106	189	60	58	189	171	556	214	162	331	357	278	420	178	464	64	51	448	215	64	554	210	101
MamGypLTR1a	79	50	61	105	82	91	81	89	64	90	74	58	194	279	153	89	821	200	369	201	273	280	157	264	184	141	148	62	247	162	118	87	817	284	294	690	442	342	212	397	855	243	121	209	338	161	1499	230	132
L1M3de	13	11	35	35	7	49	36	20	52	28	66	26	186	120	5	0	7	3	91	143	60	36	81	8	153	16	119	4	0	24	9	0	438	187	164	76	181	705	3	41	143	7	16	13	34	71	553	154	0
MamGypLTR1b	143	174	198	334	348	558	366	363	429	501	409	430	228	505	204	220	386	703	748	810	627	1100	597	910	199	370	218	430	187	184	176	184	729	431	216	266	369	289	469	213	594	764	157	547	185	109	99	171	158
MamGypLTR1d	218	223	195	267	192	305	190	251	282	225	138	250	361	696	389	177	659	355	311	514	397	463	350	382	31	26	51	18	41	33	82	153	295	238	89	154	628	494	148	385	311	16	109	461	249	43	345	97	19
L1PA15-16	2508	1865	1563	857	680	1202	1300	1605	1212	1931	1050	1355	583	1332	991	1294	1149	1723	1419	741	1373	1489	760	1352	775	917	320	629	41	409	147	722	2429	1098	862	908	816	1242	36	625	1223	748	68	334	1342	157	1052	385	74
MER44D	103	105	51	60	40	81	65	69	53	110	68	112	35	321	62	81	168	82	225	111	149	115	114	146	288	320	321	247	83	134	93	138	331	405	177	181	441	223	166	247	367	194	164	176	259	55	208	50	117
MER113	3658	2398	1557	3356	3127	1274	1753	1936	2490	2646	3647	5093	1322	2028	3109	537	2812	1930	1837	2493	2245	2985	2012	2605	631	1146	698	1335	523	854	490	785	1434	1687	999	927	1884	1364	1276	1475	1813	1698	414	1902	1099	406	865	778	458
LTR3B_	1070	823	641	6132	6738	7813	11774	12318	8889	11442	8656	8888	15485	11495	8164	7462	6740	6205	4927	5362	5661	7166	4440	6296	461	1341	808	727	432	714	404	1006	3346	3656	2883	2773	4052	4228	1906	5461	2377	2512	3404	1322	220	198	330	569	247
HERV-Fc2_LTR	0	0	0	1	0	0	0	0	0	0	0	0	0	0	0	0	0	0	0	0	0	0	0	0	0	0	0	2	0	0	0	0	0	0	5	0	0	0	0	0	0	0	0	0	0	0	0	0	0
MER84-int	11	1	5	28	19	56	45	30	20	17	9	36	20	97	2	0	74	43	42	263	135	85	170	124	89	18	16	15	52	0	30	15	29	38	33	80	48	42	271	10	177	38	13	22	178	29	113	77	95
MER41A	5468	3791	3963	9569	10071	6123	20344	22832	20040	28564	22849	29031	9516	10295	7875	6811	11814	9645	8105	10441	10792	13019	8395	10369	1406	1780	1214	1081	1197	909	1269	1616	5981	5593	4041	5126	4919	3856	1619	3360	3666	5397	1927	4133	2662	557	1978	1207	1014
MER66-int	178	204	142	732	411	609	1052	925	640	782	1160	1479	1217	655	871	482	1284	996	924	2204	1299	1539	845	1288	225	48	353	135	351	73	147	80	906	800	488	451	655	691	681	325	620	264	573	748	692	230	1777	161	44
TAR1	1177	927	582	779	478	649	1060	1006	763	1143	913	1186	1506	931	737	591	1399	860	1207	793	727	754	484	521	33	67	87	44	37	43	86	176	739	461	545	620	373	353	137	211	126	413	117	129	734	65	353	211	59
Tigger16b	515	601	540	543	370	586	494	647	619	746	674	786	956	2141	442	371	924	1082	703	1226	1048	1039	465	1113	429	382	331	300	177	328	284	206	663	761	329	610	553	512	631	794	542	419	284	452	349	235	353	334	358
MER74C	746	329	310	429	429	347	584	509	512	734	391	332	548	480	233	136	1234	907	841	1023	849	755	613	745	78	14	50	108	24	18	56	85	362	241	290	287	599	740	635	458	155	338	198	1	53	64	112	37	46
MLT2A1	140	125	136	335	548	633	885	1360	845	1138	490	643	970	1172	1595	931	1518	766	1218	780	913	1261	676	997	1415	1996	2611	1127	996	1628	1653	2292	7645	2015	1690	4905	7283	5244	6489	6715	7310	6108	5233	5612	3770	1078	7752	2059	1930
MLT1E-int	0	0	0	0	0	0	0	2	0	0	0	0	0	0	0	0	0	0	0	0	21	0	0	0	0	0	0	0	0	0	0	0	0	0	0	0	0	0	0	0	0	0	0	0	0	0	0	0	0
MER74B	992	858	613	1158	1006	1336	1144	1396	994	1121	1095	1125	2060	1289	871	1235	1153	1644	1476	1437	1602	2028	1176	1625	281	333	284	191	109	117	229	367	535	722	371	944	923	525	444	753	1114	1698	582	837	432	41	205	400	137
MLT2A2	480	673	648	1050	919	668	1593	1974	4251	5027	1187	1606	918	961	213	597	1337	1014	1109	934	1318	1753	859	1192	862	926	1328	658	415	762	862	1186	3849	1710	1115	3046	3256	2618	3835	5273	5499	2962	1894	3796	3191	674	3426	1550	1265
Arthur1B	284	289	260	334	241	326	328	346	360	373	299	344	1073	490	739	258	727	1029	590	932	615	768	537	656	192	240	183	265	139	244	189	171	1463	1229	506	680	1150	2106	695	518	353	832	276	653	160	112	458	96	134
PRIMA4-int	72	78	64	169	93	275	103	188	146	199	198	202	354	714	506	206	837	578	443	169	397	535	239	608	1293	913	719	425	207	270	541	641	1436	549	252	546	1808	796	1997	1330	1519	725	1294	1048	184	358	366	269	245
THE1D-int	286	450	493	303	435	526	540	530	433	440	486	733	1927	283	163	319	1378	1481	1196	2105	818	686	618	517	1252	1423	438	1225	461	943	568	1323	3782	2100	1002	2942	2148	3310	1991	3645	3527	4139	784	3174	1809	291	2382	759	622
Mam_R4	138	143	116	120	96	108	92	104	101	84	88	116	222	139	75	31	331	146	165	176	206	132	137	203	42	18	8	36	0	19	81	4	233	207	107	138	201	237	5	59	81	28	65	10	118	81	109	44	78
MLT1G1	2930	2920	2704	1912	1578	2047	2381	2643	2282	2541	1839	2291	5408	4328	2221	3014	5249	3302	3806	4406	4502	5398	3400	5285	750	930	574	933	419	412	676	946	4319	3957	1964	2499	4179	3314	2718	3444	2565	3693	1587	1579	1821	307	3643	831	447
MLT1G3	1483	1259	1168	1216	853	1102	1328	1284	1027	1320	1081	1251	2106	1064	1150	741	4789	3036	3284	4091	2792	2896	2423	3130	742	991	617	680	551	603	368	633	3341	2558	1534	2083	2775	1826	1651	1229	2166	2889	1268	1419	1171	460	1968	653	486
Charlie25	510	619	460	416	395	549	532	526	415	495	332	348	435	618	108	418	892	864	573	825	590	693	423	938	308	266	59	169	107	38	225	14	227	348	384	641	156	535	237	175	398	399	533	503	287	34	1529	238	98
Charlie24	668	728	618	808	687	900	967	969	887	838	891	1042	778	1142	592	297	1111	1271	759	607	736	831	521	917	221	208	157	198	207	149	115	199	716	665	550	555	559	1076	477	265	739	865	397	354	436	198	929	252	100
LTR6B	3097	3081	2746	3248	3380	3770	4988	5502	3559	4261	3928	5417	3295	2630	1818	1818	3144	3323	2973	3213	4093	3912	2732	4241	199	547	428	383	149	156	481	368	1497	1552	954	1225	1086	1238	688	1106	597	1672	538	851	2177	251	393	528	459
tRNA-SeC_e_-TGA	0	0	0	0	0	0	0	0	0	0	0	6	0	0	0	53	0	0	0	0	0	0	0	0	0	0	0	0	0	0	0	0	0	0	0	0	0	0	2	0	0	0	0	0	0	0	0	0	0
MLT1H-int	131	168	150	260	192	229	224	237	204	248	249	347	273	138	2172	245	281	263	387	224	217	650	165	277	295	345	611	228	219	291	241	299	580	276	141	379	583	80	207	344	348	50	162	180	177	35	655	139	57
LOR1a	504	504	467	1496	839	907	1811	1889	1479	2096	1636	1807	843	817	603	459	1007	876	670	1276	1036	699	708	974	361	404	432	489	317	318	215	498	913	834	844	902	1449	967	590	1244	742	840	453	562	479	233	248	376	501
Arthur1	2511	2386	2051	1197	1349	1195	2160	2304	1367	1839	1136	1383	1219	2520	1186	1071	2090	2052	1451	1982	1237	1751	1097	1365	312	354	320	307	181	152	185	221	777	424	316	695	988	898	555	1299	681	722	365	891	953	256	809	251	135
MLT1J1-int	40	44	28	72	63	78	93	110	95	145	52	96	20	606	72	76	85	185	93	535	302	277	116	138	81	39	16	133	8	32	103	20	62	169	48	186	151	475	103	54	121	35	101	55	367	132	353	80	62
LOR1b	509	434	350	1124	650	777	1425	1552	1104	1655	1353	1535	2057	837	691	659	1070	992	904	1158	1332	684	695	1389	779	1218	886	520	293	407	489	443	2354	1636	1600	1652	2488	2121	999	2280	1286	2303	972	1663	817	320	671	439	428
L1M2	3338	3601	3144	4321	3699	3701	4467	5431	4007	4479	5213	5719	5315	4567	4886	1684	4943	4483	3907	5058	3815	4358	2662	4474	5259	5576	3213	4149	2044	2570	2507	3913	7141	6660	4151	4468	9193	8448	5190	6595	5956	4175	4494	4557	4922	2072	9941	3713	3038
LTR10B2	1	7	10	28	16	19	15	19	17	44	27	60	9	0	59	0	14	2	63	28	71	5	36	81	36	6	36	111	49	43	21	64	17	47	53	68	53	76	20	10	35	13	63	109	393	26	11	200	41
LTR108c_Mam	0	1	1	2	2	1	12	14	0	3	1	1	0	0	0	0	0	0	0	0	2	1	0	37	0	0	0	0	0	0	0	0	0	47	0	0	0	0	0	0	1	0	0	0	0	0	0	0	0
MLT1K-int	102	111	129	106	104	180	111	72	142	82	97	125	178	809	472	73	470	394	357	574	423	516	214	356	38	9	1	20	8	16	12	6	88	174	40	139	43	222	192	123	7	111	217	0	92	0	318	0	0
MIRb	75905	67306	57199	66458	55297	72805	73420	82281	69769	86018	67580	81900	127271	111659	66240	71721	130345	109377	100818	122502	117762	129052	83853	120821	51245	52333	36388	55352	35436	39724	35210	47273	123452	101460	60251	79865	130467	121797	90956	117384	110110	135553	74583	101731	84860	27563	78640	50243	34623
Charlie13a	86	87	78	79	96	127	120	171	98	87	111	108	579	37	194	81	239	80	142	309	389	107	77	155	142	181	135	135	86	45	92	247	428	242	227	388	901	579	235	283	329	857	95	239	104	43	357	67	131
Charlie13b	52	53	48	67	67	78	70	85	70	80	88	52	158	212	182	6	278	173	96	291	114	123	99	189	135	85	100	250	61	109	113	222	252	234	17	134	75	85	284	407	143	50	189	157	17	103	327	60	50
MER63B	335	363	306	592	472	457	580	662	666	775	658	797	647	275	250	316	949	457	507	1076	597	721	448	767	719	450	428	563	631	567	580	754	474	650	272	466	1501	1517	893	843	1225	1497	1370	1937	951	530	1738	955	985
ALR_Alpha	26	19	23	53	47	44	27	28	34	55	48	39	160	1	91	19	377	1	245	34	237	789	101	69	215	170	155	598	113	70	189	114	68	311	113	6	451	328	175	127	200	711	329	788	1097	59	505	30	373
MER66D	54	63	40	75	88	116	110	118	134	145	102	85	116	729	148	102	33	71	70	45	119	30	148	85	58	17	37	24	3	14	20	1	45	50	20	16	30	50	52	28	49	1	107	0	34	50	53	73	13
LTR107_Mam	126	71	118	107	141	103	111	126	88	111	92	115	104	169	186	244	28	272	164	86	106	119	60	83	49	2	9	0	9	25	17	38	64	155	35	57	141	363	89	58	223	54	127	32	164	65	35	91	29
MER66C	49	21	13	49	33	37	31	51	46	53	52	41	173	0	6	85	4	71	147	67	103	169	74	25	73	33	104	56	40	24	59	61	167	189	109	133	174	103	1	57	197	56	8	102	300	15	263	74	21
MER91B	426	337	218	326	250	327	309	315	319	311	297	354	795	686	298	275	855	514	492	444	487	631	320	451	812	774	552	901	1032	1060	798	778	685	801	397	526	2097	2445	1414	3045	2018	2780	1838	1540	1837	949	345	1761	1424
MER66A	62	50	46	92	72	117	129	163	132	153	113	145	264	95	89	21	442	132	213	234	169	357	40	123	2	40	35	33	16	11	1	47	173	99	69	209	444	230	209	97	186	58	2	279	10	1	576	21	21
Charlie2a	1177	1447	1196	1169	1388	1437	2206	2642	2041	3142	1589	2591	2250	2042	2344	1505	2049	1121	1759	1708	1428	2302	792	1379	700	954	399	578	366	816	457	636	3165	2531	1371	1499	1181	1193	1075	1078	1651	2743	1751	1143	2414	708	879	1772	873
Charlie2b	2436	2417	1652	2085	1809	1945	2525	2627	2207	2576	2777	3141	2450	2971	1163	1331	2648	2307	1809	3118	2143	2006	1461	1898	877	893	378	1039	359	346	448	757	2759	2748	1182	1376	2343	1658	933	1629	1823	1310	627	1113	2962	530	1402	1214	473
MER50C	2	5	3	23	41	6	20	35	26	20	15	58	0	0	0	0	9	17	33	30	7	23	65	11	23	17	5	0	0	0	2	25	3	2	5	19	46	357	0	5	12	0	0	0	13	0	0	18	0
MER50B	577	498	568	714	737	805	1209	1289	952	1301	900	1093	954	253	369	749	1101	1158	1011	1601	1146	1438	1090	1121	232	393	381	749	640	218	458	472	2203	1385	570	1555	1186	1642	1062	1665	890	354	220	1238	694	442	506	538	419
MIRc	41148	40443	33560	36641	30430	38891	44002	47743	46265	55267	46415	56920	71587	61535	36967	39513	60998	58910	50183	66079	60880	66579	45501	61874	21079	20708	14179	23749	13772	15943	13468	18978	52728	47832	30508	35671	55809	49318	38154	47561	46714	52152	32429	43927	35080	12002	33263	22847	15778
tRNA-Lys-AAA	0	0	2	6	4	0	0	2	0	4	1	0	0	0	0	0	0	0	0	0	3	0	0	4	1	9	0	0	7	0	2	0	4	49	0	4	19	62	0	1	0	0	2	24	0	0	5	15	0
LTR22C0	17	14	14	46	23	49	49	40	57	44	68	79	33	60	11	33	99	25	21	0	16	47	35	89	29	20	50	4	3	7	2	37	232	9	50	129	8	21	254	68	9	5	24	0	1	1	0	1	4
X1_LINE	0	5	1	6	0	2	9	5	15	14	0	0	0	0	0	0	0	0	4	0	0	33	40	2	51	2	4	0	0	14	0	0	13	52	4	73	51	32	44	1	6	1	51	0	0	0	30	0	18
LTR22C2	28	31	14	46	13	18	26	13	27	45	35	32	31	2	2	0	4	117	15	2	8	4	5	49	3	18	7	0	0	0	8	0	2	31	1	1	5	80	4	3	21	5	0	0	0	2	2	16	0
MER46C	1092	1292	975	1152	871	886	959	1030	943	1070	1072	1235	1879	1649	699	804	1459	1150	1181	2507	1520	1901	878	1712	835	989	755	960	315	694	452	833	2437	2851	1378	1469	2360	932	1239	1359	1145	2066	1696	1565	976	181	1292	812	699
MER31B	353	314	237	424	676	807	611	753	639	600	614	776	920	2219	319	878	847	1309	589	1238	999	1070	680	1074	226	403	88	156	145	241	81	178	564	756	464	641	324	1073	296	636	214	477	115	165	895	285	572	202	46
MamRep38	352	398	368	245	241	266	285	264	226	313	284	268	411	480	115	395	654	388	476	746	689	612	333	461	249	218	125	426	108	297	117	65	574	497	202	588	460	654	34	515	349	652	219	330	804	82	492	202	63
MER31A	186	141	132	308	331	367	314	325	377	531	358	491	200	207	283	121	619	252	460	507	748	507	391	493	373	372	191	621	244	64	260	463	900	408	704	445	967	599	772	903	420	62	279	366	548	28	643	291	250
MER107	249	106	104	165	219	167	242	251	166	221	230	238	103	301	365	175	236	240	167	209	250	342	222	205	341	236	212	309	262	188	281	193	148	292	182	121	278	454	334	191	423	227	276	737	418	146	68	514	221
L4_B_Mam	1500	1440	974	978	1092	988	1247	1402	1329	1639	1410	1817	1369	1243	883	764	1877	1680	1438	2056	1440	1603	795	1298	864	677	460	591	191	261	362	424	1556	1027	750	853	1115	1643	586	957	825	912	894	1330	774	377	1044	594	368
Tigger2a_Car	0	0	0	0	0	0	0	0	0	0	0	0	0	0	0	0	0	0	0	0	0	0	0	0	0	0	0	0	0	0	0	0	0	0	0	0	0	0	0	0	0	0	0	0	0	0	0	0	0
MER34D	103	45	65	128	86	114	156	183	119	162	166	148	188	130	67	45	55	34	82	234	308	134	80	134	106	20	123	268	168	268	18	101	197	137	158	116	400	93	192	341	284	242	35	111	243	155	28	223	193
LTR88b	320	338	341	767	469	596	578	706	453	544	392	534	685	895	476	703	528	606	624	638	923	669	486	625	1734	1587	1033	852	318	586	563	664	347	320	390	204	1997	1855	1887	1980	2127	4450	1358	2116	889	151	393	332	263
MER20	5880	4341	3775	5164	4194	5665	5297	6052	5465	6203	5290	6559	13919	12499	6944	7224	10746	7987	8371	10091	10191	9599	8016	9635	5344	4914	3128	6298	4197	4640	4108	5060	12104	8346	5469	6722	9824	9708	8052	9748	10413	12095	6591	8822	6993	1846	5521	4188	2577
LTR30	15	11	17	22	44	49	57	37	17	39	34	40	23	7	0	0	6	159	19	120	61	0	9	155	0	4	69	11	0	0	43	2	10	130	4	31	20	124	517	3	117	494	0	0	0	0	0	0	16
LTR16E2	1919	1559	1383	1642	1417	1781	1901	2165	1890	2419	1389	1841	4082	5791	2031	2261	2706	2565	2140	2321	2798	3322	1866	3165	474	768	454	778	581	661	358	808	2635	1561	1175	1303	1535	2038	742	1567	1467	813	1448	1160	820	142	2370	476	364
LTR16E1	747	641	543	718	522	759	787	969	757	897	708	858	1576	1110	610	692	2237	1271	973	1083	1293	1228	947	1418	259	339	124	333	246	371	249	165	1238	710	310	590	1445	1185	988	1135	413	549	902	1223	234	536	1189	180	207
LTR43B	35	17	22	74	28	28	79	82	64	66	54	71	279	203	76	0	45	70	39	52	166	121	71	92	23	0	30	20	23	2	0	25	17	210	36	83	2	59	0	11	0	0	1	0	27	0	0	0	1
MER49	360	430	318	279	246	279	399	529	365	492	324	360	615	1148	603	672	939	557	765	539	809	509	401	857	360	602	188	193	215	243	135	326	935	860	710	578	1256	564	709	823	1011	1859	533	726	1338	211	510	364	94
MER48	168	133	181	253	222	391	399	400	363	385	332	384	417	325	62	295	805	488	472	565	475	454	300	530	299	450	296	343	151	397	372	380	624	572	238	638	1396	2114	1173	1348	740	983	573	626	1180	256	1358	545	407
PRIMAX-int	0	0	2	3	0	1	1	0	0	5	1	0	119	0	79	0	0	5	0	49	0	0	13	0	0	0	0	1	0	0	1	0	0	0	4	232	0	0	0	0	3	0	0	118	0	0	0	0	0
LTR36	1130	851	626	395	367	492	677	783	737	1124	608	780	1027	502	1005	617	1078	1091	861	1015	1304	1369	904	1170	128	154	57	4	48	103	86	70	929	1076	728	984	618	502	36	189	370	288	330	261	67	50	68	195	72
LTR40c	203	198	215	197	117	210	213	260	249	317	179	290	131	257	80	16	562	615	481	547	285	601	299	620	156	176	98	171	28	42	44	13	403	339	121	94	219	264	353	93	486	21	158	289	89	36	646	7	29
X7B_LINE	190	255	212	399	465	482	665	752	761	778	569	639	666	974	595	439	536	503	411	661	873	558	450	701	395	257	256	466	125	273	258	435	348	361	252	267	697	237	122	453	744	458	155	502	258	138	240	473	304
PRIMA4_LTR	51	64	45	169	196	120	169	208	200	264	178	258	34	244	251	122	601	371	214	84	367	350	294	311	135	76	74	127	40	3	63	91	578	268	234	267	439	48	9	81	319	71	72	0	3	0	13	24	0
HERVK22-int	570	504	665	591	484	766	901	1004	837	1155	716	814	777	1564	311	717	1329	590	682	675	902	817	563	1218	420	515	448	356	351	449	277	577	1242	1053	992	1087	1478	2708	1087	1277	840	1433	1599	804	1103	147	722	161	200
tRNA-Arg-CGG	0	0	0	0	0	0	0	0	0	0	0	0	0	0	0	0	0	0	0	0	0	0	0	0	0	0	0	0	0	0	0	0	0	0	0	0	0	0	0	0	0	0	0	0	0	0	0	0	1
Tigger6a	1424	1542	1093	1619	1019	1189	1123	1212	975	1113	953	1003	1299	649	734	517	726	1077	675	993	659	890	786	563	696	685	454	774	585	373	388	840	767	886	641	595	885	882	348	1313	681	1225	271	785	462	81	1230	242	169
Tigger6b	32	22	21	18	34	36	29	36	23	24	12	35	0	86	3	0	29	44	57	133	34	10	53	0	95	46	75	6	3	73	7	44	109	40	132	277	220	35	9	196	160	68	66	17	19	3	0	28	39
SVA_F	2021	1994	1742	744	884	864	1845	1791	1808	1832	1063	1399	2274	1645	594	1141	2873	1728	2197	2508	1741	1881	1357	2130	14523	11793	11291	10708	7543	8634	9550	12098	5288	7874	4653	4396	24362	17627	21383	37339	15953	15739	18771	23973	45687	23365	1217	64285	34584
tRNA-Arg-CGA	0	0	0	0	0	0	0	0	0	0	0	0	0	0	0	0	0	0	0	0	0	0	0	0	0	0	0	0	0	0	0	0	0	0	0	0	0	0	0	0	0	0	0	0	0	0	0	0	0
MER83B	207	214	208	124	119	117	153	157	186	184	138	215	229	6	4	34	257	198	126	41	143	165	132	86	257	105	99	400	65	151	162	219	321	93	41	46	245	175	201	133	559	65	254	688	116	102	371	138	123
L1MCb	2186	1512	1057	4592	4435	4410	14023	13154	10277	11863	9337	8719	23952	17755	9079	9397	7417	10283	6031	7860	8216	8245	7031	8464	987	3287	1469	1693	828	715	518	2302	6796	7901	3643	4531	9018	10142	4201	9735	6548	6682	4122	3162	305	247	3280	498	340
L1MCc	1920	1926	1288	2768	1547	1757	2162	2304	1897	2314	1594	2107	2385	1857	2774	3032	3747	2433	2275	2893	2205	2512	1712	2721	936	818	849	408	573	545	364	886	2919	2657	1323	2047	2140	1957	545	1206	1708	1592	750	1020	675	205	3596	636	201
L1PB2	72	90	73	204	195	215	287	380	240	281	295	279	380	325	429	185	864	412	501	527	368	800	282	472	823	792	395	570	243	199	265	586	2186	1200	482	917	2444	1333	280	943	888	1300	506	515	1993	320	4509	983	479
L1MCa	3430	3503	2849	4705	3638	4524	5836	6203	5015	6063	4893	6925	6530	6243	6081	3664	8277	4107	5648	6275	5768	7685	4111	6165	2340	2237	1885	2249	1269	1461	1213	2027	9742	4713	3714	4236	5786	5185	2518	3503	3043	3455	1613	2075	3866	682	7478	2029	1514
L1PB4	2591	2219	1788	3990	2771	3973	5084	5546	4420	5984	4956	6663	7482	8227	5328	5167	8434	6397	6154	6751	5523	6713	3602	5612	5370	4418	4204	5267	4280	4944	4335	5097	8194	6126	3896	5908	8415	8748	4719	7048	8357	8393	4364	6979	7453	6270	9490	8158	13086
MER72B	40	23	23	14	21	9	36	38	26	48	23	54	1	1	4	0	12	67	145	83	121	144	3	5	15	128	8	0	0	0	0	26	55	16	29	46	55	1	67	11	1	0	2	1	4	1	1	0	7
MER102b	1845	1948	1564	1611	1356	1622	2229	2286	2070	2634	1918	2136	2437	2589	1194	1621	3290	2675	2424	3515	3224	3531	2561	3762	716	1093	506	915	637	837	910	727	2176	1480	1306	1555	1697	2390	1905	2016	1947	2474	911	1877	2179	960	2033	762	1081
MER102c	7165	6565	6844	4105	2660	3905	5068	5582	3880	5595	3953	4729	3103	2604	2310	1585	3035	3291	2465	3512	2973	3029	1701	3004	1517	1143	869	1947	1083	1637	1110	1389	2038	1347	1140	1084	2447	2449	1602	2401	2302	2657	1480	1656	1911	1152	1249	2010	1419
MER102a	1194	1150	943	1995	1932	2369	2540	2865	2351	2974	2435	3127	3398	4537	2583	1982	3952	3945	3871	3238	3962	5106	3016	4111	1001	1131	914	1083	764	1300	886	1180	2690	2212	1437	2150	3102	3056	1017	3062	1880	2250	2105	1468	887	384	513	570	639
LTR58	5	4	3	29	9	36	12	22	16	19	8	9	0	0	0	0	0	0	41	356	0	2	21	68	6	0	0	1	60	60	0	12	88	80	34	11	0	5	0	0	2	0	0	0	0	0	131	2	0
AluYa5	6153	5485	4798	5398	4042	4739	9063	8806	7612	9042	7466	9456	5788	4818	4275	3371	6341	4385	5265	5539	5837	6113	4172	5620	5298	4888	3913	4641	4126	4210	3599	3868	6390	4850	4094	4506	10380	9255	7614	7261	7353	9117	5726	7737	5996	2598	5981	5888	3574
tRNA-Arg-AGG	0	0	0	0	0	0	1	1	2	0	0	0	0	0	0	0	0	0	0	0	0	0	0	0	0	0	0	0	0	0	0	0	1	0	0	6	0	0	0	0	0	0	0	0	0	0	0	1	0
LTR53-int	88	36	64	128	97	90	183	167	86	183	66	106	90	138	6	355	352	93	426	566	344	343	145	504	276	321	212	192	344	88	140	226	302	175	105	102	543	276	513	609	472	99	461	431	158	71	94	330	84
AluYa8	1860	1753	1484	1717	1332	1481	3117	3092	2731	3121	2638	3306	1708	1656	1226	1057	2022	1454	1654	1788	1876	1969	1349	1742	1872	1770	1393	1611	1514	1543	1342	1319	2038	1619	1459	1653	3703	3273	2577	2640	2700	3048	2106	3175	2176	965	1891	2107	1303
LTR55	46	57	69	98	74	105	75	68	90	100	67	114	311	508	23	349	348	314	173	150	217	90	154	123	88	92	103	47	346	247	119	42	427	407	31	153	475	388	311	578	275	1207	44	888	34	43	93	49	106
LTR56	633	514	427	520	515	698	512	574	487	556	554	646	1830	807	504	718	1487	1103	953	1530	1362	786	668	864	266	308	304	425	208	285	257	401	880	589	309	528	2227	864	385	576	907	575	457	702	184	234	541	191	203
LTR57	78	55	22	49	23	29	30	26	28	52	15	33	22	109	41	1	51	121	108	13	179	142	108	35	43	19	49	50	0	48	31	147	517	371	152	324	26	101	76	123	26	151	50	2	28	31	250	2	70
LTR45C	186	220	203	388	297	287	409	366	404	493	436	505	779	603	236	165	104	690	415	364	357	401	331	476	159	89	147	271	73	72	61	69	568	329	241	107	597	990	873	156	78	187	28	64	352	145	319	129	44
LTR45B	331	174	207	202	218	274	369	437	208	317	229	367	239	83	202	110	609	740	727	657	686	747	340	539	86	208	215	75	21	111	226	280	684	337	176	289	738	1348	491	673	638	734	216	475	182	120	428	53	124
LTR52	688	500	399	663	582	521	810	1033	725	792	683	926	1336	1328	690	548	1652	1031	991	835	846	964	803	1103	234	182	211	582	367	244	193	184	667	678	286	467	381	647	73	674	279	32	362	451	236	279	860	397	139
LTR53	93	100	132	67	110	256	171	210	96	134	160	159	203	173	158	138	197	542	152	144	275	245	180	392	106	63	80	110	34	258	26	51	176	43	72	135	412	39	87	298	323	1110	70	169	176	76	128	89	95
MER39	2478	2455	1911	1929	2010	2024	2271	2437	1921	2496	1825	2121	3715	3378	1703	1612	1693	2208	2275	2731	2754	3244	1661	3005	779	981	615	1136	351	471	486	566	2096	2115	1301	1490	3251	2533	4510	2975	4942	5129	1478	2469	1040	263	1921	611	582
MER34B-int	686	763	580	641	652	782	845	960	908	1146	900	1111	1242	816	745	1180	987	1390	1002	915	891	904	581	711	904	775	822	1612	825	737	577	1016	1343	785	212	792	983	648	1071	1299	1599	843	626	1243	582	483	103	527	866
LTR75B	55	107	76	205	48	77	32	74	46	71	63	70	34	0	1	0	110	108	16	142	58	21	56	49	91	35	101	88	42	52	98	94	83	41	29	40	84	16	107	31	65	192	50	1	97	7	38	33	72
MER30	1678	1587	1321	2139	1869	1883	2980	3412	2666	3612	2540	3579	2311	1782	2168	1644	2381	1918	1609	1756	1893	2220	1416	2107	1946	1472	1016	1431	787	1155	937	890	2285	3008	2055	2337	2576	2735	2048	2310	2666	2280	1442	2783	1203	631	2442	1208	749
CR1_Mam	195	294	264	370	330	530	430	408	433	471	415	474	842	781	477	921	746	1002	554	794	690	844	450	696	899	737	553	964	442	790	483	982	1368	1016	611	577	692	1127	1104	1301	1353	2004	587	1371	476	366	162	683	440
MER33	3554	3667	2859	3573	2769	2694	3028	3434	3070	3639	3158	3602	4766	5249	3290	3131	4397	4337	3809	4859	3928	4831	2804	4460	1776	2251	1419	2367	1200	1609	1239	2104	5072	4743	2535	3299	5740	6900	4249	4889	7289	6508	4315	6029	2686	1016	2633	2036	1677
MER34	950	713	529	850	1066	843	860	1070	935	1180	767	1024	1165	1179	856	804	807	946	868	1045	728	861	474	794	218	275	113	231	131	157	98	325	1590	1252	586	820	1047	1330	792	870	706	1549	209	207	259	29	1026	171	88
L1P4d	58	56	46	61	49	60	47	62	53	43	45	59	193	7	7	20	317	78	17	73	101	130	34	149	37	24	63	100	162	5	32	74	213	186	80	19	350	28	6	26	187	149	18	403	17	56	82	11	4
MLT1G3-int	33	72	33	91	26	77	58	102	64	104	95	102	352	232	52	0	122	18	71	83	111	239	151	63	27	47	26	0	0	0	38	54	8	78	70	24	86	110	256	17	71	4	36	53	27	0	57	55	0
HERVI-int	42	17	32	68	95	91	123	72	60	225	128	108	43	50	9	135	45	274	207	170	116	57	114	267	138	68	71	41	63	42	574	50	72	206	172	44	138	401	287	762	447	1069	388	669	69	10	214	184	18
Eulor9A	72	49	39	50	56	67	35	62	38	18	59	90	41	92	234	67	145	64	169	86	50	66	75	100	43	48	46	25	14	13	34	35	108	81	68	62	169	5	0	105	101	3	16	0	23	13	16	6	43
LTR27E	73	84	83	75	80	57	107	122	102	117	131	111	346	106	35	29	67	76	182	51	227	102	201	112	150	91	43	53	53	59	110	94	77	128	143	262	233	160	95	432	189	95	75	114	74	32	97	96	38
L1P4e	12	23	40	44	54	38	14	8	10	16	6	14	2	2	2	1	175	95	94	4	54	3	17	1	46	4	2	2	8	2	1	2	816	3	3	568	11	502	40	1	2	1	0	1	60	1	1832	5	2
LTR27C	24	11	12	16	37	44	20	68	35	26	40	41	17	58	33	5	165	11	64	25	72	103	21	18	96	139	44	3	6	2	26	18	652	125	95	8	28	13	7	87	386	11	116	0	121	2	106	68	3
LTR27B	88	46	47	517	778	368	1064	1285	976	1375	1222	1285	1366	387	196	478	967	763	531	639	453	860	530	673	4	99	155	58	42	20	38	77	601	347	119	74	524	35	0	154	119	565	247	16	1	3	26	57	37
MER83A-int	14	8	17	9	9	14	46	45	12	21	17	25	1	0	4	0	20	0	120	203	59	15	125	120	7	123	39	0	0	0	0	121	107	17	20	80	1	37	0	92	214	3	0	0	0	1	8	50	14
MER44C	68	79	105	100	80	105	69	61	124	123	67	81	430	313	396	576	103	129	284	60	299	122	70	270	269	642	182	260	504	421	265	244	1105	724	445	542	957	1240	695	603	802	1061	1202	674	874	267	408	726	304
L1MC2	2098	2754	2436	3850	2972	2905	3327	3553	3030	3198	3075	3778	4574	4388	1834	2144	4640	3656	3102	4965	3057	2972	2604	2867	2400	2312	1746	1889	1154	1370	1480	1961	5471	4480	2057	2839	3917	3883	2211	3263	2797	2333	1467	1881	4136	1040	4387	3035	1329
L1MC3	7625	7448	6092	6715	5438	6124	13222	12859	8826	11372	11731	13308	18236	18098	12090	11299	25341	19687	18776	22324	18940	19822	14314	19394	7681	8830	5950	10302	6790	7036	6483	11597	17440	12681	8688	10975	28479	26783	15027	28357	19258	29633	15549	21695	12515	5594	16474	11622	7819
FRAM	3927	3899	3326	3162	2594	2919	3940	4182	3620	4396	3237	4172	3776	3331	3270	2952	4229	3455	3896	3621	4234	4307	2941	3803	4580	5086	3804	6269	3114	5576	3854	6805	5417	5019	3757	3895	9856	11334	7536	10828	9747	9000	9748	9349	5094	2688	3529	3818	3587
L1MC1	8896	10880	7782	10844	8849	9511	11963	13225	11536	13308	10889	12853	14546	16242	15019	9526	14443	14261	11335	14324	12977	15383	8715	13343	4629	5760	4176	4526	2754	3393	2627	4435	12899	12658	7688	11007	10293	10128	8603	9104	11027	7646	5401	9091	5576	2717	19447	4213	2917
MLT1M	1878	1848	1708	971	1754	2042	1901	1975	1364	1644	1147	1467	1631	3001	1403	1103	3001	1507	1712	3329	2074	2548	1702	2349	226	373	455	243	227	159	220	235	1594	742	748	986	564	622	616	935	1195	1577	763	529	1055	161	768	208	165
L1MC4	12060	12732	9399	20005	13308	13921	22288	21640	16775	18797	16386	19225	27934	23244	11565	14642	19060	18922	15651	17496	18007	22533	14303	19095	10664	11236	6227	9932	4568	7520	6550	11694	24039	21800	11743	15323	22092	19805	14413	18584	21425	18246	13637	17986	14811	6130	15820	8972	7207
HERV9-int	267	305	210	228	330	444	335	373	371	451	431	468	802	910	726	614	2389	959	1239	1278	1166	902	691	793	205	1667	598	590	842	646	389	671	1966	829	381	384	751	2156	125	1981	868	711	786	668	703	72	463	124	145
X8_LINE	280	313	203	233	234	370	282	337	296	298	371	346	469	179	52	223	267	402	176	423	250	290	198	209	67	51	29	35	18	68	70	44	119	101	42	37	150	156	156	216	131	163	112	62	38	50	18	52	15
L2b	33246	29471	25305	33230	28367	36095	37223	41306	37338	43671	36003	44022	57364	55505	33397	34400	61288	49329	47485	62400	57972	58871	39924	57495	22184	22216	16113	24059	15992	16670	15632	21580	59338	42695	29552	36670	57032	48723	36449	44782	45908	51662	31109	42490	34441	11677	40286	23107	14302
L1MB7	9459	10800	8262	18167	15629	14646	17084	18948	16064	18384	16582	19677	22212	20862	11635	13546	22849	15488	16593	19325	17177	18039	11644	17465	10971	11862	7842	12730	6128	6773	6003	8265	19724	16165	10202	13014	21229	20584	11371	18202	18000	17137	11981	16602	15894	4159	17024	8154	5825
LTR81C	55	48	64	62	31	65	65	69	80	77	56	88	61	44	129	106	448	81	228	215	132	128	145	252	53	54	91	77	30	99	108	135	385	377	163	272	330	97	149	131	126	367	354	210	17	35	454	37	46
LTR38-int	0	0	2	1	1	5	4	3	13	6	2	12	3	4	8	3	2	98	0	75	36	1	0	23	0	16	2	22	0	29	0	0	178	0	17	124	7	10	4	59	15	11	62	5	6	12	12	3	2
Helitron1Nb_Mam	159	176	136	96	84	48	92	105	71	102	75	155	146	165	9	68	182	80	165	42	94	45	84	95	31	17	11	2	0	69	4	4	104	89	41	181	5	511	67	3	57	584	131	47	0	35	92	34	10
LTR5A	37	123	152	133	272	171	301	280	210	171	80	79	347	442	348	254	340	454	277	413	347	596	263	414	268	328	69	204	236	115	101	218	822	594	426	389	268	547	530	288	282	588	662	283	945	117	2193	244	216
LTR5B	59	135	139	81	147	103	256	247	228	204	87	102	597	337	168	189	261	469	435	367	368	423	210	346	858	892	460	1606	797	569	901	781	999	608	503	625	998	1605	850	1130	1030	1502	643	917	1866	766	1073	2063	1300
LTR81B	110	125	79	113	78	103	108	120	112	107	104	137	249	126	9	85	492	106	166	283	204	451	152	231	102	5	24	134	42	7	162	33	201	207	92	198	99	119	42	26	97	21	28	0	60	14	219	36	21
BC200	71	64	87	66	67	73	151	146	142	145	85	112	143	11	66	4	22	90	65	48	98	111	31	33	82	45	23	27	16	22	49	19	86	35	35	87	82	51	41	27	125	36	45	100	20	7	73	35	28
U17	0	0	0	0	0	0	0	2	0	7	1	0	0	0	0	0	0	0	17	0	0	0	0	0	39	43	17	113	53	54	12	60	0	7	18	38	43	13	1	42	65	6	0	0	0	0	0	27	17
LTR81A	524	576	556	549	626	582	869	979	908	1106	839	901	382	850	249	225	525	563	749	673	875	848	688	716	172	89	121	177	39	58	156	74	1128	599	335	384	480	235	414	279	472	288	346	328	153	185	402	69	95
LTR28B	161	124	171	160	112	165	198	151	153	227	115	281	448	230	231	110	65	434	80	56	163	196	133	266	4	71	14	16	13	65	21	1	201	79	56	262	18	23	2	212	269	26	124	1	11	58	514	52	33
LTR28C	192	172	106	904	488	846	746	884	751	768	698	940	1010	1652	1101	1106	1260	1641	1317	1930	1438	1932	1094	1858	129	191	253	162	342	97	152	252	309	307	53	428	874	1006	851	848	737	985	818	269	186	256	22	489	339
LTR104_Mam	1211	1142	902	1642	1652	1831	1470	1436	1185	1457	1175	1221	2456	2415	1270	2653	3598	1741	1615	4021	2572	3697	2085	3074	288	655	301	440	482	241	166	252	823	847	384	504	1074	890	205	785	531	2070	458	629	938	201	454	518	250
Tigger17	24	8	9	45	49	101	80	48	43	90	48	65	4	8	19	34	10	468	1	4	78	2	68	152	213	132	5	1	27	0	1	29	235	9	123	29	15	21	29	78	164	69	24	160	39	42	3	27	84
Tigger10	1356	1330	1142	945	986	1077	1137	1103	1045	1476	1268	1281	1444	1053	1475	852	1547	1415	1209	2410	1939	2308	1119	1501	804	620	573	773	555	519	829	860	1046	1455	378	806	1103	897	1073	631	1709	930	502	1271	603	539	740	913	392
MLT1F2-int	21	48	25	35	28	20	30	33	25	57	17	13	134	1	2	12	59	13	176	1	216	131	58	72	151	59	28	12	46	156	98	3	298	43	94	145	167	0	82	149	10	1044	1	81	87	57	184	173	52
Tigger12	1788	1809	1484	1071	766	996	1095	1240	924	999	842	919	1553	1128	782	822	1087	1643	1023	1737	1914	1791	1167	1679	590	315	375	236	276	180	253	347	1130	1101	291	680	317	528	251	448	115	942	426	853	823	115	1279	563	282
MER4E	226	169	144	359	258	341	476	554	446	570	460	619	328	372	164	179	586	412	676	1030	709	738	716	599	280	132	147	706	164	138	223	231	1033	519	465	491	482	371	419	804	620	282	479	492	588	160	728	781	340
MER4D	675	581	464	734	747	810	1054	1105	1021	1187	786	1245	1270	1102	1119	2028	2048	1549	1518	2422	1515	1370	1127	1508	301	264	444	301	282	295	122	358	1300	1053	459	749	1444	1435	959	1477	974	948	827	978	363	170	598	237	198
tRNA-Ser-TCA_	0	0	0	0	0	0	0	0	0	0	0	0	0	0	0	0	0	0	0	0	0	0	0	0	0	0	0	0	0	0	0	0	7	6	2	6	2	0	0	0	0	0	0	0	0	0	0	2	0
MER4A	382	329	278	396	401	396	478	626	530	782	547	877	860	292	178	476	733	571	363	669	842	990	499	641	610	832	426	451	477	870	292	800	1030	1259	479	822	1583	2379	476	1426	661	804	593	530	1431	159	81	931	526
MLT1E	913	842	621	597	450	735	986	898	680	920	531	638	1093	958	375	507	880	813	873	860	838	1486	340	1087	110	188	116	111	142	114	34	60	1035	533	486	625	702	450	592	530	303	375	228	74	108	20	496	185	103
MER4C	77	83	64	164	112	141	191	240	176	178	121	269	339	311	52	59	513	271	146	219	115	130	178	148	180	11	66	49	115	4	27	96	384	247	83	210	377	218	17	111	94	144	81	168	106	2	146	123	63
MER4B	247	371	206	517	545	589	558	772	596	676	535	617	1237	917	656	636	996	962	882	1049	593	1127	830	1546	410	276	413	681	171	190	291	191	1744	943	466	1033	1055	1466	914	799	813	287	192	416	1510	480	375	503	770
MSTA-int	41	46	44	94	137	153	197	197	236	243	164	213	339	79	62	75	644	886	554	728	547	1156	430	271	265	392	542	190	321	283	211	304	2212	1316	780	1314	905	785	1913	657	1232	1032	954	577	1206	129	2374	622	320
MLT1J2-int	127	141	95	179	211	180	243	268	228	316	139	185	363	231	341	130	360	135	184	343	291	264	236	290	68	191	37	68	90	31	20	277	516	177	197	73	809	698	637	386	327	789	345	432	424	121	55	260	139
MLT1D-int	158	182	156	129	146	145	159	230	165	205	201	162	114	2474	411	158	199	466	426	337	271	220	63	267	108	41	142	381	8	87	17	146	767	305	308	583	287	232	2	372	420	216	56	21	370	41	926	26	23
HERV-Fc1_LTR1	3	1	0	11	6	7	1	9	1	11	2	6	0	0	0	0	0	0	10	0	0	2	0	12	4	7	7	3	0	44	4	0	9	0	23	1	2	6	0	6	4	11	65	2	12	0	0	126	0
HERV-Fc1_LTR2	1	0	0	3	1	2	1	2	1	1	0	1	1	0	3	2	1	0	1	2	6	1	0	1	18	9	25	0	0	0	0	4	2	0	2	0	232	571	0	2	269	988	165	3	6	0	0	56	0
HERV-Fc1_LTR3	0	0	0	0	0	0	0	0	0	0	0	1	0	0	0	0	0	0	0	0	0	0	0	1	1	0	2	0	0	5	0	0	0	0	3	0	16	37	0	0	13	59	11	0	0	0	0	54	0
MamRep1161	0	1	0	0	0	0	0	4	0	0	0	0	0	0	0	0	0	0	0	0	0	0	0	0	4	1	0	0	0	1	0	0	13	7	3	24	0	0	0	0	0	0	0	0	0	1	25	3	0
MER6	1750	1176	1002	500	507	615	699	735	684	1023	754	935	1496	750	338	533	1475	1233	1554	1280	1464	1739	1036	1587	422	379	237	249	51	112	211	128	967	699	503	1311	1229	1627	375	649	773	792	282	343	100	21	997	174	163
LTR80A	31	67	47	23	19	19	53	32	26	52	17	17	4	20	3	119	164	59	4	47	73	183	107	189	121	74	26	0	0	0	20	8	102	122	24	0	50	4	0	0	13	93	16	29	101	0	5	0	34
LTR80B	76	74	49	139	116	118	103	94	109	110	81	55	12	101	19	37	74	5	18	73	165	30	126	162	75	61	63	108	3	30	14	70	144	186	106	319	81	34	32	83	219	7	28	89	132	1	193	94	34
HAL1	23312	21245	20187	23486	19609	25234	24956	27108	20878	27091	24849	32871	25374	19786	18638	14811	27137	25012	22259	26076	24814	30986	16166	24369	10909	11776	7656	9002	5604	6403	6189	8471	25123	20341	13906	16914	24259	22174	15781	14621	21158	21323	10760	13915	13843	5157	19652	9003	6373
MLT2F	1055	1065	1012	1292	1140	1532	1919	1948	1353	1593	1396	1764	2233	2220	1773	1541	2968	2329	1606	2179	2157	2970	1891	2391	1231	818	525	1692	889	891	781	1104	1659	1374	795	1102	1925	2760	1226	2142	2855	2692	1569	3191	1563	223	1383	763	355
MLT2D	2393	1596	1807	4646	4753	3010	11287	12595	10610	15707	11742	14819	6292	5460	4382	4046	6927	4952	4687	7103	5834	7331	4837	5535	1045	1163	687	769	745	484	699	727	3611	4048	2426	2940	3013	2027	1499	1701	1992	2860	1386	2126	712	410	2504	702	341
MLT2E	1133	1020	775	703	496	632	850	759	422	580	1163	1443	830	697	919	448	2149	2410	1178	1797	1615	1946	910	1369	75	147	133	74	71	118	99	244	765	609	482	512	808	228	184	581	81	16	82	66	37	66	66	65	2
GSAT	24	15	8	8	0	13	22	31	124	53	34	30	2	482	6	595	424	191	84	299	120	164	262	97	5	0	0	0	6	0	0	0	11	119	3	213	0	28	0	0	0	0	0	0	208	0	0	0	12
MER34A	303	358	295	1069	717	839	1308	1316	1138	1415	1069	922	1332	958	371	405	649	1457	716	1167	1135	1547	721	699	106	410	359	83	124	166	251	209	865	659	239	426	750	883	234	598	578	195	113	573	475	63	403	179	271
HUERS-P1-int	144	107	132	83	107	158	121	103	211	142	103	129	218	49	51	186	324	358	351	761	482	292	194	350	179	490	288	760	276	157	37	192	474	188	72	410	446	395	467	135	192	325	137	22	80	36	1043	19	79
MER34C	8	1	3	6	12	4	5	8	14	7	10	7	47	0	3	0	207	76	46	1	1	20	22	15	30	78	14	64	11	31	14	3	42	22	52	32	653	235	453	205	16	118	327	282	137	1	2006	76	16
Charlie1b_Mars	0	0	0	0	0	0	0	0	0	0	0	0	0	0	0	0	0	0	0	0	0	0	0	0	0	0	0	0	0	0	0	0	0	0	0	1	0	0	0	0	20	0	0	0	0	0	8	0	0
Ricksha_0	540	773	432	870	768	737	282	306	188	321	392	489	878	796	989	523	406	279	397	865	384	529	231	534	115	12	50	204	9	61	80	15	408	307	100	84	198	567	103	168	35	337	108	4	122	15	370	32	26
ORSL-2b	150	149	108	204	150	176	217	225	214	235	148	152	244	641	22	144	519	469	273	224	464	328	214	358	107	142	143	9	30	73	120	24	646	347	261	245	457	334	257	46	152	259	289	179	83	17	142	83	32
DNA1_Mam	15	6	5	5	6	5	7	19	4	0	8	9	212	0	2	0	0	0	35	0	10	42	25	14	7	3	0	0	7	0	3	29	4	112	14	32	0	2	0	107	40	0	27	81	0	0	34	0	0
PrimLTR79	8	30	12	17	10	14	24	24	13	35	38	48	0	180	2	4	169	25	56	1	57	1	15	44	166	5	1	19	0	0	0	11	176	146	34	30	83	173	2	38	1	3	65	43	138	3	58	7	0
LTR57-int	99	26	14	57	49	137	66	107	96	633	101	135	1985	36	32	6	51	5	62	115	93	378	78	91	35	71	15	72	7	2	4	79	551	734	150	456	158	354	253	400	1342	211	32	28	29	94	385	49	81
LTR8B	1522	2113	2216	699	615	708	993	968	956	1059	966	1103	990	1645	770	607	1983	992	871	1764	1311	1549	1340	1201	1111	572	874	1177	464	640	471	915	1400	667	876	828	2889	3086	1219	1431	2492	976	853	1561	920	297	686	515	461
LTR8A	820	622	575	1154	1103	1221	1416	1619	1346	1930	1338	1862	721	1271	1057	637	1585	990	1002	878	1439	1093	971	1508	522	279	391	206	254	317	333	386	1109	433	403	815	1599	1066	259	1081	619	1223	450	947	796	69	94	324	228
Tigger12A	1148	1031	1003	858	466	699	584	819	716	847	631	733	310	621	215	259	331	383	292	366	269	503	196	261	128	153	43	282	91	80	229	183	358	444	295	289	542	319	131	336	219	651	100	142	262	150	214	85	146
L1ME4a	23315	24399	19317	26187	19604	21066	22528	26446	24412	26921	26446	28432	29698	28464	19185	21220	20524	20987	18092	22653	18472	20835	15395	20777	9330	9753	7007	13297	5213	8700	6920	11087	19483	21057	11238	13566	28233	26350	24119	25374	20429	32412	19236	22835	14981	12996	20354	12191	10392
L1ME4c	5436	6137	4491	8208	6783	5370	7146	7461	5963	7165	6677	7395	9724	8022	3862	4593	5356	5298	4429	6259	5240	5864	4010	5216	2294	2175	1598	2799	1383	2042	1645	3065	4498	5745	2969	3784	5716	5700	5705	4489	4924	4701	3126	6760	2842	1416	3022	3015	1743
L1ME4b	11918	12904	10182	12368	11927	11152	15777	17321	12529	14781	12345	14963	18647	14899	10187	9467	21443	17475	15848	17929	14993	16563	10741	16581	8628	9718	5500	8930	4327	5240	5065	7255	18807	19216	10047	12534	22001	20819	13968	18046	17359	17156	11735	17754	7084	2947	13134	5910	4423
LTR89	1288	1013	807	1582	1741	1750	2294	2447	1579	1824	1520	1791	2359	2885	1132	1481	1025	2328	1318	2434	1497	1151	1165	1335	141	95	92	368	125	141	50	186	527	646	228	428	292	319	504	308	344	184	151	213	741	102	222	21	102
tRNA-Leu-CTY	25	17	31	12	6	21	22	27	27	38	23	29	61	0	3	0	11	86	36	62	29	84	15	35	24	16	6	2	0	0	4	5	6	6	47	28	8	8	0	0	10	0	83	0	0	0	29	1	0
LTR87	572	544	496	253	189	252	255	244	175	234	202	233	614	465	307	15	645	142	469	354	567	334	364	529	372	331	217	227	275	174	207	278	348	557	208	86	806	1181	43	294	824	1156	522	138	542	370	100	322	200
ORSL-2a	122	101	66	86	67	68	68	100	94	129	72	81	325	151	30	29	268	78	104	108	207	212	138	203	20	91	53	11	28	0	13	28	140	132	41	124	144	258	117	73	127	133	80	0	92	9	15	27	14
LTR83	116	81	80	243	160	131	100	114	137	198	97	119	384	20	218	76	108	193	289	200	197	189	92	258	45	96	70	70	111	130	40	77	396	171	93	88	384	383	651	269	252	1005	141	149	64	37	760	250	120
LTR81	98	67	61	93	90	96	83	109	69	99	69	61	8	100	60	67	114	115	87	44	181	211	124	119	5	21	4	21	13	0	36	0	63	205	19	71	89	15	55	97	69	5	0	1	2	2	201	1	41
MER65D	178	125	90	96	108	163	163	222	151	175	126	184	480	201	30	292	277	375	196	235	233	367	114	169	101	80	124	173	172	66	39	61	451	258	134	519	541	306	208	155	684	404	189	153	617	274	247	125	143
Tigger3b	2470	2515	1971	2509	1674	1964	2894	3272	2433	3262	2451	3065	3220	2580	2165	2257	3824	3859	3285	3644	3372	3308	2254	3315	3942	3224	2446	4858	2320	2404	2649	2353	5866	4186	2677	3411	5575	3999	4279	6975	4174	4577	3564	3844	5011	1329	7825	3524	2128
MER57-int	5848	6473	5588	3209	3571	4687	5119	5250	4883	5821	3516	4110	5830	4393	4785	2607	4801	5567	4425	5798	3988	5484	3271	5865	2687	2069	1520	1342	568	810	1025	1371	3804	3312	1519	2395	3132	1939	2862	4107	2422	2602	2331	1674	2490	712	2848	985	699
Charlie17a	533	521	415	353	250	393	262	296	225	415	415	541	1021	645	934	263	1128	509	450	462	699	669	545	839	275	238	214	228	150	207	104	116	996	412	473	353	648	255	335	674	472	714	267	357	538	111	318	178	111
Charlie17b	162	263	190	156	100	155	160	130	85	100	140	124	167	280	238	70	165	168	177	331	152	149	136	129	78	52	41	79	12	70	24	79	366	91	59	211	189	181	399	165	89	15	44	87	9	2	170	52	92
HUERS-P3-int	346	299	408	238	380	570	236	366	317	236	260	392	773	570	1877	183	601	146	303	441	365	320	242	482	202	198	72	170	98	239	16	39	668	226	226	676	963	30	161	297	411	457	44	217	694	85	116	551	219
MER34-int	73	123	74	85	95	77	122	133	98	120	102	114	415	109	488	30	158	46	304	206	223	54	82	259	10	42	139	224	90	22	95	219	569	179	185	144	399	330	616	88	458	178	392	50	197	6	288	96	20
Eulor8	74	36	39	104	153	128	113	106	122	139	88	127	165	479	33	45	36	127	198	205	172	138	169	227	17	0	8	3	0	0	0	62	152	116	99	34	3	62	55	19	21	37	2	0	1	0	79	11	1
MER54B	113	129	111	127	64	73	117	185	152	166	175	182	179	400	177	14	58	12	39	221	217	140	61	139	89	25	9	0	0	0	13	34	53	48	18	61	224	167	5	14	96	95	8	107	52	1	335	37	0
7SK	422	152	192	173	264	279	294	262	291	457	197	295	709	211	81	412	243	319	401	499	344	412	432	498	263	197	247	268	267	129	152	396	583	132	279	234	777	495	499	967	854	627	576	393	217	59	204	140	101
Eulor1	19	19	12	12	23	12	9	21	7	13	30	34	23	26	0	4	44	4	8	17	14	4	12	14	0	1	2	0	0	0	1	0	0	15	0	10	19	0	0	0	0	0	0	0	0	0	0	0	0
Tigger17a	979	782	705	1258	745	873	974	1186	1093	1163	1071	1200	2191	1542	1357	762	1446	1578	1369	1743	1240	1572	1141	1103	496	497	366	628	214	657	578	532	1879	1467	883	1465	1045	2615	795	1541	2152	996	903	1480	774	258	2190	528	615
HSATII	0	0	0	0	0	2	0	0	1	0	0	0	0	0	15	0	0	0	0	23	4	805	1375	1107	183	61	507	226	19	13	16	528	2	13	1	0	101	274	71	431	95	559	378	98	1939	448	8	1353	190
L1M	85	83	59	81	81	93	100	74	74	95	74	78	40	231	72	84	140	95	108	122	91	51	71	158	230	274	209	194	164	241	151	196	217	85	87	143	395	183	262	178	377	740	180	250	362	85	183	218	202
Zaphod	797	976	867	661	614	586	498	526	545	609	603	473	973	1327	229	355	1014	652	1103	775	723	1100	712	704	137	99	116	477	243	284	92	235	575	543	232	656	573	736	642	264	607	255	314	721	551	81	1029	247	95
Tigger18a	735	788	677	577	315	487	591	575	474	469	517	572	762	1041	106	358	1014	619	487	793	686	869	364	627	442	528	216	580	249	368	218	297	902	1019	582	612	1280	688	837	695	1971	1062	423	1022	66	202	266	324	169
tRNA-Arg-CGY_	0	0	0	2	1	0	1	0	1	0	0	0	0	0	0	0	0	0	1	0	5	0	17	6	0	0	11	1	0	0	0	0	11	16	5	8	0	0	0	49	0	0	0	0	0	0	0	3	7
Tigger3	449	388	346	411	369	463	443	545	426	615	364	396	735	1004	399	481	841	948	600	1146	420	713	282	453	815	1080	594	755	890	520	258	1046	973	873	542	1050	1614	1324	860	1037	1590	1831	1085	1097	1126	289	1572	455	284
MLT1I-int	67	83	62	117	79	106	103	109	107	158	101	173	466	314	166	184	275	143	565	466	483	390	229	745	108	535	207	257	256	64	184	26	505	428	218	220	503	589	202	214	206	209	310	149	216	0	503	55	1
MER4B-int	340	336	240	450	292	365	344	466	310	491	418	630	1057	800	536	592	830	472	929	965	461	950	324	611	252	262	348	495	149	210	186	322	1012	819	395	561	1012	409	6633	1256	3234	931	503	2723	76	75	752	169	217
LTR106_Mam	125	73	58	119	68	97	25	71	65	51	99	112	69	132	6	62	104	153	97	168	151	193	64	101	7	174	87	56	0	20	44	41	241	11	90	69	314	16	202	194	262	9	66	208	224	179	8	32	128
X6B_LINE	70	64	46	156	87	105	97	88	130	125	86	71	255	330	61	139	206	111	167	115	215	130	134	96	1	27	23	14	18	23	17	5	156	39	72	61	104	64	198	49	54	241	14	42	72	44	11	119	44
MLT1A-int	32	44	72	224	154	346	216	198	260	257	239	272	347	259	412	308	481	594	437	462	282	366	235	267	103	80	136	319	81	427	33	117	655	226	388	159	1202	894	100	799	357	27	469	80	2144	21	542	144	266
tRNA-Ile-ATC	28	18	17	6	10	5	8	6	16	8	6	10	0	0	0	0	0	0	15	0	25	1	16	0	52	37	27	54	8	11	0	26	16	0	0	4	106	149	12	0	0	5	0	207	0	0	0	0	0
Eulor11	4	1	5	8	9	8	2	1	7	14	6	9	26	0	0	56	4	0	2	9	52	9	7	13	14	0	28	0	0	0	14	0	0	0	0	0	36	0	0	0	0	0	0	0	0	0	8	0	0
Tigger5	338	358	312	576	568	608	702	830	616	751	481	610	1132	882	1187	798	639	812	901	2245	1018	1452	705	1129	888	664	408	910	625	840	496	1107	570	627	515	958	1204	1235	583	1122	1540	2143	649	1110	1737	390	278	1070	622
MamGypLTR1c	163	189	147	261	184	169	177	220	169	246	136	193	185	177	372	87	670	450	267	98	366	406	291	199	280	313	434	465	72	102	283	393	547	196	290	323	724	574	152	708	356	329	267	969	762	118	714	291	198
LTR48B	1484	1290	1092	2093	1817	2098	2076	2213	1847	2866	2209	2628	2866	2317	2001	1811	3301	2115	3175	2389	2854	3807	2496	3891	1173	962	1090	2085	950	1793	906	3126	2730	1949	860	1076	7649	5862	5214	9583	5569	10129	6710	7613	2163	1062	1942	1098	1243
Tigger4	2410	2654	2233	2337	2650	2996	3558	3596	3015	3438	2071	2157	7969	5617	3535	3327	6016	5720	4966	7518	6094	4821	4218	5880	931	1279	701	979	733	592	1172	901	4381	3342	1975	1957	2414	1597	1602	2498	1697	1796	2035	1700	2494	357	2137	1199	523
tRNA-Ile-ATT	5	0	3	3	2	0	1	9	1	8	3	10	0	0	0	0	30	0	11	0	8	0	0	13	0	0	0	0	22	3	1	0	1	4	21	11	0	0	0	17	0	0	0	0	0	0	1	24	2
MSTD	1321	1334	1307	1540	1295	1558	2201	2114	1954	2221	1729	2117	2939	3277	2702	2034	4380	2663	3042	3651	2978	4115	2490	2943	1623	1510	1278	1484	756	1307	1027	1285	4821	2776	2209	3032	4081	3770	3318	3645	4279	2588	2511	3531	2876	779	6162	1986	1095
LTR12	2955	3273	1999	3195	2599	2647	5547	4604	4144	5157	6200	6695	4787	3566	2414	2222	6190	3516	5211	6053	5355	6935	4364	6673	1268	3453	1761	1632	1923	1691	1355	1896	3172	2805	1627	1888	2769	2878	1738	2988	2391	3410	1853	1857	3189	338	9647	1195	756
LTR13	102	71	167	320	225	185	360	432	455	396	450	348	412	429	49	505	1335	130	399	1115	709	646	501	733	1029	1601	1024	1190	695	828	629	1491	1698	1097	938	1395	1641	1896	3840	2957	2316	726	637	2564	1382	777	481	977	799
LTR14	4	1	13	28	32	42	26	44	52	61	33	77	0	270	11	0	1	207	81	129	1	133	101	61	0	51	42	128	42	71	210	44	205	3	54	58	67	40	22	273	287	182	77	0	18	1	0	142	8
LTR15	258	141	114	213	268	345	435	487	413	428	237	284	178	752	393	447	346	279	538	278	349	391	342	335	191	170	225	185	113	182	92	281	607	268	227	287	748	350	160	467	358	243	347	711	550	73	119	135	61
LTR16	1516	1132	1026	1655	1311	1722	2047	1933	1620	2069	1732	2073	2588	2353	1288	1366	2437	1949	1929	2535	2570	1907	1964	2637	428	551	764	667	358	411	351	526	2190	2212	1583	1550	2125	1552	696	1134	1573	1500	857	1368	737	186	2578	436	343
LTR17	6602	5725	4953	7714	7705	6732	12293	13140	14912	19702	17380	20701	8517	12135	5033	6898	8281	7408	6707	5639	10236	9792	7738	11345	776	799	955	741	903	921	527	835	5150	3318	2362	3766	3363	2314	1157	1405	2282	3327	1502	2136	3143	395	2617	943	825
tRNA-Leu-CTA_	0	0	0	0	0	0	0	1	0	0	0	0	1	0	0	0	0	3	1	3	1	6	0	2	0	0	0	0	0	0	0	0	5	1	1	0	0	0	0	25	0	0	0	0	0	0	1	0	0
MER5A1	6999	5800	5254	6850	5404	7247	7997	8595	7182	8982	8121	10752	9789	8709	6055	6550	11001	9740	9420	11218	10570	12692	7319	10983	3035	3028	2448	2786	1693	1658	1935	2455	7281	5641	3888	4483	7726	8116	5424	8177	7713	7115	3867	6273	4426	1692	4877	2582	1708
LTR78B	1621	2148	1621	2598	1721	2127	2334	2733	3045	3296	3475	4345	5535	4107	2831	3067	2732	2931	2844	4193	2314	3516	1810	2360	749	871	553	626	362	629	396	1076	3249	3147	1481	2069	1806	2111	1369	2242	1680	896	1552	1012	745	117	2318	484	138
MER97d	49	54	22	88	80	73	29	45	41	45	38	34	1	15	1	13	14	128	164	11	94	18	152	210	0	2	25	0	11	2	0	36	150	17	33	56	34	109	0	218	5	1	75	0	11	10	584	29	99
MLT1I	6787	5975	4280	4817	3866	4873	5245	6084	4528	5807	4867	6454	8929	6013	3779	4788	7564	6894	6681	7695	8174	7918	4657	8416	1710	2088	1275	1680	1024	1055	1242	2084	5593	4485	2878	3489	3647	2795	3023	3460	4742	4654	2462	2250	2547	574	4126	1263	1071
MER9B	8	7	8	5	10	10	4	6	14	26	13	25	12	2	3	1	156	145	113	95	68	10	42	153	158	174	207	113	255	15	228	174	145	106	64	30	533	517	44	298	578	103	697	476	466	40	72	131	10
LTR51	22	29	36	70	56	89	76	71	89	59	83	104	782	181	421	266	99	317	172	224	277	650	131	383	100	28	5	4	2	32	0	75	533	346	76	97	108	212	1	152	11	163	4	49	380	2	451	0	0
X7C_LINE	156	172	159	277	247	294	241	302	252	290	264	333	506	175	348	331	380	292	338	459	491	378	359	432	186	193	97	203	61	119	115	136	463	167	165	237	248	229	233	259	213	314	50	192	156	32	111	80	36
Merlin1_HS	6	8	15	20	15	49	30	27	22	41	10	28	97	122	51	21	74	74	74	133	117	221	82	93	34	32	9	7	3	77	2	30	6	45	78	4	8	146	4	371	11	4	1	0	1	32	0	5	0
MER34B	466	474	270	421	367	501	524	571	594	648	418	532	296	740	370	243	910	386	487	473	266	300	295	513	441	594	546	821	286	543	382	689	1325	1024	249	474	3050	4912	5706	3311	5024	2957	1990	9158	1038	349	386	956	773
LTR40A1	318	303	321	305	59	71	138	112	140	140	209	259	352	1016	198	60	415	526	236	283	371	364	221	367	83	76	92	88	5	80	51	110	191	209	203	167	280	237	103	233	199	346	6	20	4	7	958	22	73
LTR41C	95	116	88	134	105	137	113	157	87	106	126	174	188	302	78	101	302	395	206	421	229	210	233	203	164	382	157	490	83	22	197	54	247	139	213	288	442	654	189	163	405	74	284	396	273	14	370	276	228
LTR41B	3609	3508	2966	1292	1114	1194	1242	1271	1501	1783	1748	1910	1636	2001	732	991	1832	1303	1566	1128	1680	1488	1428	1833	263	517	322	163	338	218	248	483	1590	1622	506	1460	1053	1368	383	961	730	440	393	575	415	183	645	447	407
Kanga2_a	363	309	277	434	395	478	418	442	321	454	404	552	527	311	462	291	1146	561	606	1309	683	798	344	519	589	518	310	617	200	492	389	497	1559	1263	596	1185	1024	1020	490	781	716	651	127	1021	516	320	1051	311	332
LTR29	170	202	156	250	223	252	341	324	316	358	328	386	515	780	246	454	723	472	672	354	741	853	467	787	348	309	258	663	326	359	302	598	1046	754	328	483	1562	966	954	1467	1449	2153	1015	1506	656	279	457	436	320
LTR14C	0	3	2	10	31	0	0	12	8	10	7	2	0	0	100	0	278	0	31	0	4	0	6	0	20	40	159	79	120	0	70	10	154	120	132	116	422	289	387	130	177	401	266	563	1190	147	150	165	101
LTR14B	1122	783	795	2157	2783	3214	4324	4685	4749	6278	3146	3429	2787	2589	2239	2757	2295	2161	2116	2889	2581	2806	2060	2517	351	386	133	146	113	396	158	409	1188	869	859	1066	1971	1201	555	1692	1290	787	725	1025	856	219	458	221	141
MER101B	72	84	54	71	54	56	78	84	80	61	76	103	195	181	57	336	80	211	218	201	362	79	204	98	70	163	65	28	41	42	8	86	66	362	157	191	375	68	178	221	128	576	0	251	501	4	118	61	72
MSTB1	1031	779	734	1240	1141	1263	1707	1633	1360	1812	1835	2260	2590	2472	1605	1932	2021	2074	2068	1993	2176	2498	1262	2225	2271	2277	1303	1792	828	1325	948	1303	2546	2047	1617	2359	5203	2795	4101	3778	3510	5029	2178	4321	2301	413	1519	1458	512
LTR103b_Mam	219	211	207	213	139	181	162	230	206	229	168	229	204	319	248	238	196	232	223	198	328	252	196	211	51	29	27	8	13	5	45	24	271	176	111	31	183	162	10	55	56	64	0	0	2	13	143	8	31
AluYk11	2606	2459	1999	2193	1711	2105	3603	3672	3264	3832	3315	4147	2413	2239	3728	1735	2643	2195	2359	2827	2630	2747	1878	2726	2563	2345	2272	2145	1943	2277	1761	1761	3074	2210	1822	2036	4851	4405	3395	3502	3716	3930	2914	3649	2740	1335	2571	2898	1782
AluYk12	2359	2218	1894	2002	1540	1866	3645	3583	3246	3851	3027	3819	2187	2028	1392	1355	2620	1817	2192	2213	2400	2513	1718	2312	2655	2505	1897	2294	2176	2176	1883	1907	2974	2268	1754	1985	5004	4516	3691	3618	3897	4180	3017	4126	3163	1408	2481	3097	1915
LTR33B	1049	934	963	785	789	995	910	874	903	1053	899	1005	1843	2437	1689	1590	1854	1896	1531	2031	1744	1978	1652	2206	578	1101	632	1069	601	887	922	555	1771	1309	506	797	809	952	967	1884	918	909	1028	607	729	493	556	989	313
HERVE_a-int	1143	743	720	389	330	460	1284	1165	599	812	462	652	698	757	345	454	624	651	398	524	893	1028	641	683	394	360	280	281	269	212	203	162	467	115	226	212	608	620	461	385	553	685	350	803	545	100	167	348	152
LTR33A	595	646	506	802	770	668	825	905	916	1031	805	924	934	1041	504	764	1261	756	723	1120	891	1144	893	1100	314	420	123	197	282	252	72	471	1145	705	625	452	1024	915	491	1029	671	966	496	466	440	112	367	346	210
U14	31	4	0	9	1	5	1	6	2	2	9	0	45	0	49	114	14	25	26	0	0	14	27	11	75	10	81	239	98	329	55	144	107	95	66	132	118	234	123	102	200	104	186	117	60	102	0	5	47
LTR105_Mam	1028	724	523	848	577	568	1036	1144	1200	1617	1466	1853	823	1350	304	524	1424	1411	1049	1995	1419	1647	1193	1653	434	585	246	368	167	57	227	314	805	161	89	282	237	651	532	768	297	222	605	952	289	4	697	55	72
Charlie23a	235	283	213	297	176	192	370	419	373	516	408	449	522	360	369	251	610	845	736	561	683	636	405	574	117	225	115	377	112	213	180	375	1213	1049	575	1128	1055	597	227	599	602	588	609	599	725	103	434	249	153
Helitron3Na_Mam	268	233	214	513	469	452	641	671	608	710	614	534	777	784	859	358	511	608	515	918	688	795	564	984	274	141	161	217	203	285	185	123	743	802	237	337	344	577	278	740	336	463	157	233	170	42	123	178	143
L1PA2	448	590	698	522	607	851	1287	1324	947	1085	709	880	1461	2560	935	1068	3852	1097	2260	1462	984	1473	857	1111	1733	972	1060	1093	590	959	582	930	4512	2113	1365	2862	2072	1762	990	1294	1156	1558	1147	791	3896	499	13125	2157	905
L1PA5	427	529	611	588	731	1203	1139	1336	1058	1086	852	1723	3289	3725	2275	1648	6862	2686	4310	2803	2212	2223	1559	2312	4700	2310	2433	3128	1609	2034	1575	2416	9051	5191	3376	5858	4415	5033	2348	2751	3303	1963	1713	2989	6883	1548	26117	4295	1473
L1PA4	759	899	910	950	854	1013	1338	1583	1229	1243	1136	1481	1960	2497	1482	1254	6048	2242	3926	2764	2141	2332	1560	2078	3573	1754	2224	2272	1190	1679	1171	2181	7164	3503	2439	4516	3918	3159	1979	2647	2771	3128	1712	2146	4817	1318	17996	3323	1681
L1PA7	1136	1178	1205	1818	1227	1324	2038	2143	1937	1742	1135	1544	2512	4432	3508	2253	4998	3240	4116	3412	2310	3348	1794	2253	4941	3827	3728	3431	1718	1805	2034	3400	11764	6248	3351	5864	5559	4733	3227	4221	3551	2700	2222	3505	4408	1117	22535	3002	1231
L1PA6	4781	13081	10422	39813	57566	77840	28179	31856	93357	67179	79342	93158	84829	79223	66777	55976	344649	333464	279347	410363	249016	204871	172378	273144	104134	49086	78975	107816	106564	86949	101553	97350	74345	93807	57893	59830	143945	127965	107216	140095	126774	118393	77822	111233	316988	142532	281399	185727	179674
L1PA8	640	670	961	3334	2233	1995	1951	2260	1865	2039	1475	1640	1962	3240	1197	1335	4616	1282	2436	2012	2043	2344	1218	1994	9804	4945	3879	8368	4851	8423	5391	9285	9138	4204	2386	4526	7897	7772	6964	8132	7569	6897	5179	10511	6858	6121	13801	5682	9884
MER90	1238	1080	954	964	619	789	728	922	680	1049	1214	1146	817	721	1434	689	1794	1622	1176	1875	1113	1474	720	1052	445	599	515	646	388	494	280	813	564	1332	446	514	867	641	2632	1068	4169	1804	624	869	333	117	317	279	153
L1P4c	0	0	0	1	1	0	4	0	0	0	0	0	0	0	0	0	4	1	3	0	0	0	0	0	2	9	2	5	1	0	0	1	2	2	1	2	1	1	1	0	0	1	0	0	4	4	15	2	1
MER94	901	857	748	968	1090	1023	890	1035	929	1178	770	1156	1707	1671	524	677	1262	1583	1340	1399	1424	1840	1107	1521	630	493	332	508	333	429	358	386	1783	1377	821	1095	1255	778	1298	1135	1202	1291	985	999	571	254	1068	246	284
MER11A	101	91	95	140	162	159	377	418	312	308	245	253	210	388	122	250	347	432	663	366	229	402	191	237	1283	582	526	586	347	320	389	828	1883	1502	697	1657	1682	932	1423	1040	1319	1453	477	1103	1421	515	1189	414	482
LTR65	80	35	34	55	62	70	75	105	74	99	98	107	80	35	8	169	412	194	145	447	193	41	38	303	90	177	95	185	6	330	174	199	463	541	114	458	401	353	293	269	450	803	117	288	626	51	151	47	88
LTR64	74	90	78	97	120	84	120	123	121	173	140	132	42	1	4	200	167	273	150	99	135	101	58	46	98	190	246	327	595	92	148	175	228	95	82	545	414	638	428	190	113	538	182	8	430	103	658	128	79
LTR1B	405	469	480	2281	1289	2332	1951	1966	1891	2135	1561	2134	2832	3910	2048	2067	712	1492	1122	1832	2411	3183	1890	2544	161	162	35	197	198	151	112	222	649	720	758	286	1199	645	231	314	461	411	283	593	83	44	47	50	1
LTR1C	734	684	452	675	565	695	872	885	791	845	482	464	2859	2973	1264	506	2537	2199	2365	1490	1993	2981	1499	1828	145	44	220	30	24	133	12	39	401	299	328	378	969	888	696	570	425	904	339	36	6	1	58	97	41
LTR1D	2953	1467	1361	2132	1470	1503	758	835	716	868	1340	1967	728	1258	1345	568	1003	1104	909	1390	1163	1499	933	1132	241	91	46	54	80	64	209	135	651	334	315	229	409	431	31	565	276	66	217	52	812	122	917	69	7
LTR1E	24	41	23	86	135	80	429	411	236	252	76	95	711	1283	107	27	240	311	216	190	167	240	72	182	19	104	81	2	3	8	18	32	492	133	150	320	48	42	1	8	68	7	99	2	157	0	624	1	3
LTR1F	22	26	8	72	40	70	149	142	137	153	107	79	84	93	99	20	103	220	91	276	153	386	97	206	4	3	6	1	2	4	1	5	36	93	135	86	16	51	51	130	8	30	3	6	13	28	511	121	0
LTR62	502	270	326	437	336	458	433	384	353	485	396	426	855	481	39	289	388	868	607	616	1235	1491	929	1141	52	56	94	48	114	27	24	62	399	539	265	171	387	97	296	163	300	74	70	264	354	42	266	82	7
MER41B	1561	1326	1180	1364	1257	1128	1682	2012	1724	2275	2061	2273	846	818	738	663	2893	1853	1997	2265	2339	2862	1619	1747	1272	766	523	651	608	763	504	899	2760	1405	1103	1726	2558	1999	2530	2308	1587	2270	1453	1954	1619	352	2007	1085	824
MER5B	14555	12499	10365	12159	9312	11275	12559	13706	11976	13454	12105	14699	19357	16590	9628	11049	16542	15379	14661	16724	17121	20004	12357	19166	4362	4438	3268	5115	2796	3910	3146	4832	11491	9932	6590	7818	11410	10669	7225	10895	9290	8742	6893	8429	9576	3192	7067	5623	4156
MER67A	30	28	36	133	138	152	181	185	142	260	164	196	321	405	210	512	370	377	249	522	515	362	137	385	108	105	100	38	38	6	111	49	362	427	161	223	616	222	48	229	179	10	171	159	294	29	209	43	38
hAT-N1_Mam	59	69	72	60	70	51	49	50	36	67	22	47	150	0	2	56	167	230	64	50	51	28	43	32	98	83	58	0	73	35	20	27	246	280	74	101	373	126	156	119	47	105	63	425	25	3	281	21	50
LTR69	14	18	19	20	15	18	15	15	9	20	24	21	0	0	1	6	1	53	7	114	0	165	17	60	0	0	33	0	0	0	0	0	1	0	35	0	31	0	32	0	0	0	1	0	2	0	0	0	0
LTR68	13	11	6	4	5	9	5	4	3	11	11	3	0	0	5	31	2	0	27	0	14	38	20	22	1	22	1	26	0	2	23	41	29	5	28	73	13	4	78	1	1	150	185	1	53	44	165	133	28
MER5C	782	681	440	621	498	662	603	747	556	689	527	821	967	1085	193	221	862	718	808	559	814	1320	445	771	403	199	206	391	123	212	327	334	416	669	383	309	1035	2203	254	482	592	236	365	481	500	176	342	368	199
tRNA-His-CAY	0	0	0	0	0	0	0	0	0	0	0	0	0	0	0	0	0	0	0	0	0	0	0	0	0	0	0	0	0	0	0	0	0	0	0	0	0	0	0	0	0	0	0	0	0	0	0	0	0
AluSg	24869	23619	20325	23259	19063	21077	34351	34385	31040	36090	29959	36331	26519	24431	17261	16088	29768	22299	24182	24866	26410	27886	19453	25614	24431	22682	16799	24187	21011	19420	17252	19266	36580	26542	19774	25177	57821	56406	44567	43704	45591	49264	32897	47069	33551	12866	23444	27543	17741
MER70A	239	203	160	207	110	132	212	272	104	213	161	173	548	303	207	581	520	704	299	812	358	400	403	576	56	100	178	164	26	174	129	91	737	324	233	381	409	272	73	427	737	364	122	75	249	50	35	135	157
Tigger17c	74	94	72	84	93	90	58	109	100	64	71	108	99	234	48	44	92	127	129	44	78	239	242	89	120	68	74	80	9	85	45	104	270	343	170	180	236	326	143	125	124	254	91	6	234	36	167	122	130
LTR10F	154	65	103	352	301	357	623	630	485	590	359	415	161	232	230	192	231	232	277	84	398	363	196	386	76	34	21	95	8	17	117	17	525	367	300	291	439	222	229	189	371	39	145	403	452	62	59	40	135
LTR24B	47	60	54	57	57	88	59	56	61	45	50	95	193	260	58	44	20	149	93	24	42	41	17	47	155	162	168	84	47	14	47	63	392	327	155	88	1221	182	261	101	178	655	193	181	72	0	1	120	145
LTR24C	47	40	39	57	45	54	65	51	69	74	64	82	163	9	148	20	426	68	95	110	85	86	23	14	203	98	84	29	66	144	70	67	524	176	60	166	307	305	144	90	255	297	203	217	359	46	1095	71	36
L1MD3	3413	3782	3068	4506	3667	3565	3805	4202	3550	3735	4417	5197	3164	2743	1624	2167	4103	3703	3357	3862	3327	3461	2229	2987	1526	1802	1148	1762	876	869	921	1039	3958	3377	1899	1618	2856	2439	2994	2320	2482	1732	1825	2538	1069	639	3104	1305	894
L1MD2	3461	3721	3111	5815	4104	4530	5124	5821	4908	5946	4432	5035	7616	7586	4271	4074	8518	7516	7330	7834	5894	7191	4388	7091	4018	4085	2927	4158	1892	2390	2306	3182	11869	9325	4170	6765	8063	9708	4756	5911	7411	7780	5952	4238	7016	1592	14610	4775	2525
L1MD1	2383	2106	1823	2728	1831	2067	1916	2521	2373	3012	2149	2744	4235	4217	2230	2358	3490	4019	2334	3281	2900	3356	1956	2473	2094	2465	1338	2345	1389	1374	1118	1347	3980	4000	2903	3266	3962	3638	2292	2166	2620	2923	1121	1955	2552	443	4549	1414	966
HERV17-int	1388	1108	1004	2318	2606	2296	4014	4163	5235	7279	6941	8411	2884	3634	3059	2218	3241	2757	2913	1672	3679	3937	3065	3631	1821	1999	2957	3188	3105	3119	3094	3609	3068	2322	1407	2280	4252	3788	4009	3783	3752	7576	3615	7787	2622	625	2670	908	853
LTR1C1	946	1003	926	514	486	862	788	831	649	1157	456	609	289	481	600	144	778	508	484	516	636	933	458	940	0	12	72	1	4	121	5	1	49	119	96	78	120	25	1	85	12	103	157	682	5	26	17	0	0
LTR1C3	290	301	157	1294	989	1226	1881	1922	1809	2560	2187	2917	1492	830	865	1316	1392	1148	1767	1829	1713	1796	884	2155	201	388	292	404	175	122	231	445	1565	1116	1093	1091	532	343	617	489	193	556	224	271	0	5	22	66	89
L1P	4	3	0	3	8	4	12	10	5	7	2	9	9	11	7	6	63	10	11	10	21	37	15	31	37	20	26	20	13	13	13	25	117	27	14	24	43	35	18	20	22	16	7	14	50	13	70	24	11
MER70B	326	254	219	222	165	187	234	257	213	173	191	234	771	935	464	289	739	310	627	885	238	472	254	541	295	226	130	99	120	122	301	207	514	463	109	281	708	676	630	891	497	306	213	589	201	90	0	77	87
tRNA-Gly-GGY	2	15	9	43	50	31	40	40	40	26	21	48	69	59	1	3	63	69	45	81	35	28	40	54	21	31	6	0	8	4	6	14	39	84	0	16	1	8	9	1	63	17	18	7	0	9	2	6	8
LTR84a	165	220	164	215	230	240	186	227	165	247	141	221	1110	258	185	209	243	369	330	247	190	259	239	243	154	65	50	61	10	199	163	101	379	220	103	129	151	18	46	136	473	353	3	0	296	58	620	84	7
LTR84b	193	179	181	263	219	314	219	269	186	245	148	241	339	313	301	51	488	448	473	404	482	563	417	576	132	184	40	230	113	149	82	139	625	574	177	373	825	224	297	629	509	138	297	334	162	42	764	155	116
tRNA-Gly-GGG	0	0	0	0	0	2	1	0	0	0	0	0	0	0	0	0	0	0	0	0	2	1	0	0	0	0	0	0	0	0	0	8	3	4	0	0	0	0	5	0	1	1	0	0	0	0	0	5	0
MLT1G1-int	19	20	11	25	24	23	38	58	50	34	18	53	243	0	1	8	75	54	112	8	102	28	107	87	177	75	17	2	0	1	0	152	76	143	77	63	251	257	107	161	323	784	1	1	144	24	376	43	66
MER77B	1028	931	837	540	473	647	599	739	775	915	663	931	1591	1085	574	401	836	1296	1092	1806	1012	1611	992	881	429	435	298	921	159	311	452	511	995	1245	513	499	915	886	483	685	617	847	574	267	692	187	1291	671	415
MER132	12	6	6	11	6	10	16	6	10	15	9	18	0	0	0	0	107	29	23	0	28	17	2	34	0	0	0	16	0	0	0	0	1	0	11	1	0	0	0	0	0	0	0	0	0	0	0	0	0
Tigger17b	8	1	1	20	5	10	1	5	3	3	4	7	1	0	0	0	191	38	14	1	36	43	47	0	94	8	0	49	0	0	17	0	155	155	30	0	0	2	8	0	54	2	0	14	4	0	60	14	1
L1ME3A	9320	10427	8033	12317	9098	9422	12048	13496	11699	12955	11505	14717	15813	12817	7368	8534	12216	13926	11946	14925	12567	14280	9230	10922	4700	4578	3316	4553	1567	3305	2738	3471	10992	8467	5466	6546	9447	8749	6206	6849	8894	8356	4987	8032	7562	2019	8107	4275	3204
L1ME3B	7830	6023	4256	9512	6153	6634	7173	7886	6857	7547	7674	8993	7502	6410	4508	4514	6230	5846	5295	5682	8085	7468	6290	9146	3319	4692	2560	3631	1852	2305	2244	2103	6206	5356	3196	4129	7581	7530	7149	6772	9562	7353	4867	7204	6193	1447	3871	3625	1462
L1ME3C	2975	3383	2461	3222	1775	1500	2154	2304	1816	2174	2062	2176	1535	1843	719	1429	2377	1641	1273	2608	1308	2747	1005	1684	1388	813	615	1630	749	632	685	1054	2052	1437	740	1317	1536	2139	1417	1122	1263	1458	1164	1785	384	276	2133	594	456
L1ME3D	1354	1360	1155	1858	1630	1578	1485	1807	1327	1483	1349	1481	1526	2606	698	1029	1925	1838	1739	2317	1466	1692	1057	1363	2025	2292	1431	3118	965	1822	1530	1797	1825	1685	979	1662	3830	2216	3405	3861	2973	1677	2420	2345	1789	745	2433	1251	440
L1ME3E	2826	3453	2652	2978	2545	3244	2716	3218	2900	3090	2722	3299	3540	2920	2104	1493	2362	3519	2568	3777	2447	3199	2029	3086	3521	3577	2038	2812	1540	2678	2658	4207	2880	2534	1355	1557	4354	4391	4682	6355	3588	3316	4657	4000	2113	1452	4530	2300	2619
L1ME3F	1786	2462	2052	2057	1735	1793	1863	2352	2296	2575	1617	2085	1441	2156	1289	1813	2116	2181	1663	1855	1982	1817	1320	2293	1923	992	823	1628	467	920	977	1162	2636	2154	1417	2100	3924	3573	1772	2113	2841	1092	1434	2810	1662	703	2297	1050	782
L1MA8	3248	3821	3251	5637	4083	4043	4923	5275	4474	5121	5121	5765	6527	5862	2849	2463	5350	5031	4695	6288	5237	6178	4222	4121	2639	2616	1608	3110	1405	1745	1445	1848	6584	4686	3246	4621	4938	5923	3145	3957	5471	2964	2383	3792	4697	1260	11028	2583	1503
LTR25-int	3289	2749	2319	1946	1292	2058	1888	2399	2104	2427	3201	3994	5849	5370	4855	4360	8139	7670	6953	9131	6510	5103	4892	7928	2959	3465	3486	3952	3418	2784	3175	3574	4830	6532	2766	3381	18628	17036	15938	16133	15860	25716	15217	18805	4946	3018	1117	6313	4407
Tigger1a_Art	61	47	83	50	30	19	10	26	14	47	49	29	2	88	3	0	107	2	26	163	40	52	93	89	60	33	22	138	29	116	35	57	120	198	40	18	307	321	0	40	140	13	32	1	222	4	215	4	100
MER57F	168	212	147	413	265	223	248	216	342	420	240	309	790	18	134	277	140	114	80	153	120	133	119	66	2	35	104	176	43	122	95	143	102	41	153	185	168	164	60	149	154	250	66	272	304	134	246	32	25
MER57D	17	31	19	26	36	42	76	79	60	35	28	40	33	0	189	150	97	16	58	231	46	44	43	11	4	45	38	66	21	0	4	3	145	87	63	70	272	147	70	192	260	3	296	34	93	52	331	13	61
MER47C	130	135	108	137	126	134	120	151	140	102	135	190	1500	924	324	604	664	1110	512	995	458	533	435	413	224	208	80	256	158	128	166	298	158	177	135	166	356	253	306	408	497	278	243	255	161	189	313	243	244
MER47B	435	566	323	748	366	396	487	407	323	362	671	662	717	1046	423	645	781	1059	277	1525	496	813	389	711	126	44	146	150	84	114	21	260	947	413	269	267	633	558	59	709	452	105	375	212	357	31	591	71	34
MER47A	11016	15545	12252	9067	9997	7444	8510	8986	8113	8603	8451	9891	9428	9991	4236	5640	6307	6798	5556	7894	6143	6983	5119	7283	1082	988	839	958	472	778	705	954	3032	2565	1182	1480	1968	1918	1272	2214	1748	1825	1092	2326	1224	392	1280	808	932
SVA_D	1647	1465	1524	1303	1130	1226	2809	2954	2468	2975	1904	2478	1627	1707	1126	959	3227	1358	2398	1639	1826	1847	1330	1785	19555	16787	15886	15212	11376	12560	13399	17133	8010	10153	6425	6149	36112	25217	29075	52144	22333	23851	26890	34293	60204	30020	2879	80708	43206
SVA_E	400	336	456	161	283	236	665	776	583	723	282	336	426	548	298	239	1251	401	890	415	456	453	364	544	13199	10692	10426	9554	6893	7770	8849	11144	4448	6873	4026	3547	22228	15446	19524	33489	13920	14643	16729	22129	43087	21768	1107	60134	32419
D20S16	121	174	216	1477	988	2107	1166	1326	1585	1711	5839	8136	5597	5344	4392	2946	10519	9140	6641	11950	6891	7114	5386	7662	630	2256	323	134	475	934	228	529	2437	2050	1208	2365	1114	464	1086	1887	1027	188	431	1876	817	75	80	65	80
MER30B	64	71	54	103	109	110	342	345	292	392	153	273	70	63	105	107	117	183	88	132	49	235	39	82	160	145	107	113	113	114	60	74	190	161	154	208	464	323	203	152	307	104	158	325	240	82	381	235	168
SVA_A	1027	906	903	814	696	801	1426	1479	1291	1478	1164	1447	1074	954	656	743	2189	1092	1508	1281	1192	1267	865	1185	11182	9432	8943	8531	6283	7507	7569	9737	4660	6127	3846	3318	19181	13775	16056	27996	12750	13872	14275	17940	32674	16486	1588	45397	23831
SVA_B	495	460	573	313	340	351	826	922	763	891	545	680	669	443	352	576	1939	748	1399	664	766	751	510	782	13249	11014	10993	10010	7324	8315	8943	11510	5143	7131	4130	3856	22195	15529	19464	33886	14693	15869	16887	21910	41154	20751	1400	56348	30095
FAM	8125	6077	5037	5038	3937	4985	5638	5697	4645	5824	4738	5858	3596	3761	2947	2648	6055	5268	3987	5179	4842	5919	3589	4782	2343	2645	2076	2947	2052	2578	1926	2773	4091	3474	2762	2641	5371	5224	3996	7402	4399	5547	3944	5193	2782	1401	2570	2489	1613
MER89-int	367	375	284	180	237	266	253	231	174	231	185	261	188	1401	91	307	548	174	539	888	407	601	289	650	39	50	23	159	7	68	17	4	390	367	504	230	319	6	35	135	60	93	143	409	0	47	561	8	42
MER90a	231	223	211	568	424	403	566	622	497	655	616	758	765	710	686	463	1397	478	706	979	816	1175	557	889	212	335	441	411	137	160	179	226	1047	583	600	700	992	287	943	964	726	173	753	671	276	252	434	362	206
MER97a	42	61	44	54	18	20	37	33	26	23	19	45	1	1	4	1	2	13	17	135	27	145	86	1	0	58	1	0	0	6	1	0	122	80	21	4	94	8	1	19	86	7	4	81	118	5	356	6	26
tRNA-Thr-ACY_	0	0	0	0	0	0	0	0	1	2	2	0	0	0	0	0	0	0	0	0	0	0	0	0	0	0	0	0	0	0	0	0	0	0	0	0	0	0	0	1	0	0	0	0	6	0	8	0	0
X5A_LINE	89	108	105	165	96	201	246	236	254	226	145	156	215	162	148	61	4	81	47	120	108	126	48	80	63	15	49	0	0	3	1	26	25	119	40	17	4	18	2	12	55	31	2	58	3	50	6	52	34
MER34C_	903	643	856	545	449	753	654	788	871	891	789	1411	1669	842	649	1469	1479	1240	1369	1167	1580	2046	1154	1368	325	328	336	354	101	124	202	372	610	504	294	623	319	542	480	554	423	114	218	418	185	55	70	268	108
Tigger14a	529	842	449	1028	861	716	815	921	1030	1058	1112	1146	1405	649	335	463	750	685	457	854	594	661	401	450	153	89	294	380	47	243	250	291	551	358	242	298	432	321	268	561	551	718	170	599	402	258	237	506	640
MSTD-int	83	84	84	154	141	146	178	227	245	205	166	307	109	200	146	204	146	129	406	189	202	791	269	93	368	176	109	221	153	527	198	78	164	316	155	360	664	1382	540	1309	691	274	387	316	313	162	1949	781	87
Charlie22a	516	543	486	530	542	710	561	653	601	645	635	759	834	1528	425	996	377	965	671	1344	746	806	626	1037	366	411	149	275	201	335	175	206	382	368	391	274	268	595	310	578	571	401	179	870	246	120	200	406	346
L1MC4a	3247	3376	2776	4481	4127	4567	5053	5573	5314	6003	4864	6014	7858	6380	3430	4114	5760	6056	6457	6054	7163	7006	4654	6431	3895	4177	3033	5488	2810	3373	3126	4937	7371	7261	4415	5284	9484	6981	7035	7769	7039	7893	5568	6557	4457	2677	10372	4493	3372
Ricksha_a	158	117	61	81	84	55	95	66	125	87	77	163	147	93	90	31	182	81	147	133	100	139	79	156	5	40	8	7	17	10	0	22	52	206	41	65	79	90	69	150	30	176	152	64	25	19	8	13	21
LFSINE_Vert	3924	3606	3377	4454	3556	3817	6189	6409	6202	6347	6293	7412	9918	9843	5528	7117	7617	8016	6514	8553	6405	8080	6294	8451	2211	2640	1188	1643	1332	1380	1170	1510	7533	5440	4482	5565	5062	4838	2412	3921	4478	4987	2368	3092	1437	798	1500	1162	892
L1MDb	914	831	791	589	427	639	859	942	619	966	624	666	474	870	833	385	404	735	439	834	518	424	336	506	215	214	230	220	153	91	132	287	559	466	329	311	225	149	132	658	262	364	316	223	46	133	899	369	130
L1MDa	4857	4632	3436	10134	9114	8627	17110	17419	13136	14935	17364	18360	52607	31113	21010	21436	13049	17030	11330	15755	19636	19412	15203	18088	4619	4268	3429	3535	2108	2556	1723	3863	10911	11014	5546	7377	19961	13944	10357	12945	11217	11044	6623	9348	3767	889	12049	2952	1696
LTR75	66	124	55	55	36	55	26	31	63	74	56	75	0	32	134	91	441	82	97	130	116	21	108	51	134	45	44	253	155	66	86	206	241	321	189	161	392	196	174	401	141	110	80	29	67	15	606	73	164
7SLRNA	650	655	512	820	1681	1286	1396	1707	1527	1614	1015	1419	602	703	675	436	1778	1309	1486	1385	1158	1108	729	1098	641	584	378	960	567	346	382	466	916	1391	606	1064	2035	1603	1181	1434	1562	989	1079	2080	1131	368	677	586	417
MER6B	399	341	317	643	210	263	380	507	354	510	460	695	320	228	137	134	790	873	392	391	494	758	285	278	136	162	104	131	154	138	56	296	256	332	167	268	736	802	405	287	370	401	313	335	503	72	523	200	171
LOR1-int	415	515	458	586	481	492	459	584	468	623	533	508	1212	86	482	839	791	947	650	1151	650	940	494	797	867	881	328	746	192	364	271	813	911	745	482	507	1947	1829	1604	2273	2076	1052	1125	1424	1235	874	815	1166	623
LTR72	50	55	39	48	37	16	46	33	51	29	25	24	1	281	13	31	295	52	185	39	353	81	31	69	56	189	85	388	619	69	112	279	662	73	80	306	403	230	257	153	278	22	24	75	127	94	343	33	74
Cheshire_Mars_	0	0	0	3	2	1	13	15	6	3	0	0	0	0	0	0	0	0	0	0	0	2	0	0	0	0	0	0	0	0	0	0	0	0	0	0	0	0	0	0	0	0	0	0	57	0	0	0	0
HERVP71A-int	1	5	1	8	5	2	15	10	8	6	14	2	0	0	4	1	20	0	11	1	151	90	2	0	65	0	1	101	111	77	59	357	63	226	7	459	432	95	2	244	53	48	309	1	458	1	1	7	32
L1P3b	8	7	9	11	6	10	15	18	12	14	15	17	31	39	16	20	81	30	68	221	28	35	31	28	44	27	42	55	23	19	16	28	188	53	75	65	40	32	11	29	22	16	17	20	110	56	293	48	63
LTR73	89	112	122	92	134	106	159	152	160	199	67	82	0	232	68	151	223	233	109	257	138	461	201	144	78	169	82	121	117	81	47	96	439	42	111	336	57	15	194	40	18	164	119	33	792	36	357	103	33
HERV35I-int	86	160	71	330	131	154	404	493	412	504	163	196	481	157	508	308	342	218	363	382	442	383	281	211	609	598	331	198	253	195	243	341	523	166	349	336	711	1395	168	930	504	157	127	291	237	58	739	107	46
MER68	738	691	592	761	621	642	674	768	580	796	648	834	2111	521	600	1077	1092	1464	1444	1922	1135	2121	826	1048	847	756	476	998	421	505	481	534	1143	1713	576	949	1602	797	888	984	2822	1176	805	2339	832	296	3051	700	413
LTR108d_Mam	8	17	8	11	5	11	4	11	1	10	2	2	95	0	0	0	15	45	0	0	0	0	0	21	3	0	2	0	0	0	0	56	0	59	0	0	61	54	0	0	0	0	0	0	11	2	16	1	0
tRNA-Tyr-TAT	0	0	0	0	0	0	0	0	0	0	0	0	0	0	0	0	0	0	0	0	0	0	0	0	0	3	0	0	0	0	0	0	0	32	30	0	0	0	0	0	0	0	0	0	0	0	0	5	0
MER110-int	810	665	605	293	319	466	411	398	334	539	424	626	228	339	518	552	238	364	590	636	747	607	349	722	107	150	130	15	33	8	209	204	586	549	421	307	678	154	292	174	190	735	238	118	5	0	39	22	26
Tigger2a	8453	5483	4246	2057	5408	6972	2963	2958	2812	3168	2362	2658	9243	9026	4234	5603	3109	3809	2782	2976	3196	3219	2067	3940	1197	1180	578	1015	383	938	638	597	4741	5238	2261	3089	5479	4912	3545	4374	3325	4134	1836	2655	2416	365	1445	697	372
Tigger2b	125	101	75	54	66	99	151	178	116	144	32	93	0	0	15	6	5	210	55	64	170	108	104	143	0	0	0	0	10	0	34	0	63	96	30	26	0	2	0	2	8	0	26	0	36	0	2	14	18
MLT1C-int	59	65	81	109	79	116	109	99	114	99	122	173	86	52	1144	481	127	673	294	196	250	388	318	198	166	86	210	368	22	147	143	233	179	72	124	333	256	37	697	424	414	457	174	114	162	9	17	131	116
HY1	68	57	34	36	30	39	33	51	59	64	58	46	212	0	3	120	73	178	85	43	48	19	13	9	121	106	62	171	101	64	68	136	417	778	264	190	662	742	544	645	474	407	127	260	357	119	27	120	111
HY3	563	594	506	555	470	561	789	1005	877	1064	707	853	1068	871	886	696	661	1019	641	1038	674	692	529	582	295	309	246	250	78	297	243	179	477	497	584	564	403	631	450	454	341	111	303	387	331	284	89	383	194
HY4	18	37	32	19	21	27	24	27	18	25	9	19	77	3	3	4	4	0	15	62	5	10	16	10	43	35	41	23	11	29	42	102	172	93	42	221	94	1	113	0	71	28	80	37	51	7	80	46	34
HY5	0	0	0	0	0	0	0	0	0	0	0	0	0	0	0	0	0	0	0	0	0	0	0	0	0	0	0	0	0	0	0	0	0	0	0	0	0	0	0	0	0	0	0	0	0	0	0	0	0
MER87	0	3	6	3	11	4	18	27	24	10	8	6	352	149	4	14	203	43	124	2	7	27	57	35	44	31	3	380	84	86	83	73	6	27	24	163	325	362	163	34	0	2	15	3	52	23	151	4	0
MER89	753	759	582	1583	1380	1268	1622	1815	1433	1890	1119	1504	1617	1485	1165	1081	2128	2016	1457	2035	1997	2181	1522	1857	240	284	208	99	67	30	81	155	818	652	406	500	658	846	463	453	891	108	313	714	211	105	975	137	128
HUERS-P3b-int	189	131	125	169	89	142	125	185	128	182	123	142	369	181	319	401	381	285	406	458	236	749	187	139	172	64	128	360	310	671	151	397	518	602	701	536	240	336	521	784	835	425	438	862	517	326	247	199	151
U4	166	157	104	101	99	139	282	273	290	316	193	307	36	136	109	175	100	107	126	206	194	208	103	150	71	44	37	4	9	14	15	14	215	99	77	113	215	92	108	72	29	128	29	7	50	6	14	34	10
MER92-int	884	679	745	1073	662	1190	1471	1665	1602	1966	1247	1637	1610	611	991	1799	1605	2038	1801	1871	1068	1611	732	866	410	277	289	832	131	325	337	404	831	632	313	968	802	114	460	774	1050	945	479	1322	345	163	739	353	435
5S	200	279	210	425	706	635	3955	3604	1411	2219	1466	2178	545	298	66	233	351	209	178	379	261	251	156	301	242	183	113	384	272	115	254	169	628	695	362	428	604	346	391	389	406	223	254	255	218	141	182	151	99
LTR50	2239	2147	1606	2181	1827	2026	3066	3044	2474	2750	2053	2469	1944	1867	1406	1886	1023	2362	1868	3228	2630	2207	1965	2444	859	835	287	1717	413	426	609	1083	1756	1281	744	1511	1793	2436	1420	1920	1504	1450	1736	1133	1357	397	2225	826	785
LTR19B	51	50	29	69	28	39	50	46	95	80	43	86	447	10	4	16	6	2	50	23	39	80	148	175	35	41	125	109	68	90	84	119	243	22	67	153	303	804	609	520	797	1614	758	130	102	1	260	155	42
LTR19C	55	40	20	66	36	78	72	83	64	152	43	61	44	0	5	184	332	77	163	72	40	130	146	162	12	98	16	31	94	4	114	84	28	15	54	29	25	213	11	44	33	56	24	3	555	9	172	10	16
LTR19A	110	91	83	208	156	178	239	281	283	286	204	272	271	483	160	606	376	209	193	652	242	500	291	330	212	292	109	303	64	165	72	203	117	421	209	301	847	452	85	283	468	463	18	202	774	2	52	332	244
MLT1J2	2889	2780	2226	2564	2453	2774	3176	3357	2829	3398	2512	3210	5998	5210	3458	4304	7397	6550	5292	5229	5336	5648	3910	6252	1312	1971	1255	1599	1223	1087	1031	1872	3778	2986	2103	2979	5809	4791	2220	4197	4451	3943	2469	3252	2734	815	3537	1802	1070
Tigger3a	947	1123	1014	992	749	880	747	819	959	955	1039	1059	2637	1735	663	1399	4774	1496	1924	1513	1354	1432	1211	1316	3182	3010	2115	4396	1546	1933	2393	3284	6224	6396	2596	4241	5457	3764	3001	3131	3848	2929	3001	4129	1030	783	3769	1571	1304
MLT1J1	2127	1909	1796	1929	1607	1951	2902	3076	2294	2913	2008	2498	5198	4153	2534	2816	4468	3086	2988	3796	3510	2744	2080	3524	821	1108	805	695	455	758	1178	768	2325	2952	1447	1972	3275	3523	2860	2974	2615	2300	1889	2000	1932	527	4402	1352	698
LTR2C	2378	1517	1976	693	861	1195	2732	2693	1351	1628	922	1166	1013	510	699	654	888	460	448	420	953	970	431	900	242	440	190	538	161	283	276	288	980	1116	672	632	787	683	1235	1133	1182	1004	540	771	429	174	118	433	320
LTR2B	425	339	362	544	373	449	663	802	589	592	443	495	730	784	628	895	514	553	302	322	680	1258	245	589	211	542	212	498	556	295	155	291	687	483	518	271	1512	2542	1245	796	1058	1333	356	1051	470	229	283	504	458
HAL1M8	637	740	636	838	722	731	757	887	741	663	790	995	1533	806	4186	862	984	1056	1218	912	1282	1176	969	1198	1466	1450	1579	1646	986	1505	763	1099	3436	2298	1655	2284	3467	3007	1543	2859	3772	2908	1565	2462	1869	312	2416	1357	610
ORSL	210	182	172	187	229	243	192	229	211	236	169	205	377	142	157	240	763	195	226	376	372	246	196	230	208	133	86	89	48	103	69	87	373	178	166	336	439	501	419	507	292	414	568	326	261	108	140	170	49
MSR1	30	21	26	64	67	72	127	105	81	96	110	112	46	75	15	23	198	68	204	145	100	71	147	142	30	63	42	19	64	60	68	114	104	38	45	77	138	370	74	192	221	321	123	94	313	28	3	135	49
Tigger8	229	264	206	179	256	170	214	232	329	192	181	244	506	97	187	245	171	454	245	284	155	280	257	384	99	277	152	481	365	254	180	96	441	890	427	302	412	638	168	328	619	680	207	575	152	85	403	265	52
LTR49-int	782	690	576	630	619	635	563	845	684	888	580	724	1029	936	811	491	947	1240	953	1127	1533	1177	982	1238	969	878	671	980	409	1209	703	929	1025	936	386	670	1388	1567	1733	976	1372	2469	1212	1802	1448	973	1289	1071	715
MER31-int	968	778	520	1348	1137	1284	2289	2361	1678	2124	1730	2051	1953	1504	1179	1453	1426	1190	1282	1284	1961	2002	1154	1798	204	168	176	286	155	117	138	151	1450	1359	594	812	839	1274	128	395	499	365	416	252	640	112	975	356	227
Tigger1	8815	8405	6264	8781	8493	9230	11548	12033	10432	12312	9633	11932	19874	14104	8647	9534	17679	14272	12392	15553	11590	13121	8611	11826	11970	10753	9097	11706	7161	7934	7960	11966	20380	17955	11104	13873	24375	23635	14621	21546	17264	14548	11802	20702	13579	5320	19412	7760	5867
tRNA-Ala-GCY_	0	0	0	0	0	0	0	0	3	0	4	0	0	0	0	0	0	0	3	0	0	0	0	0	3	0	0	4	0	3	0	0	0	0	0	17	0	0	0	0	5	0	0	0	0	0	0	2	5
Kanga1d	114	150	106	157	93	114	136	150	100	118	78	88	114	47	45	14	221	129	193	135	249	64	156	249	96	73	19	54	30	3	19	56	198	97	37	37	145	60	38	252	54	138	128	114	168	25	171	39	15
Tigger2	2875	2401	1873	2242	1974	2758	1966	2291	1839	2015	2001	2580	1612	2142	1750	1873	2184	2385	2370	2458	1875	2261	1486	2472	2538	2979	1573	1579	910	1458	969	1774	6332	5245	3092	3623	4853	3637	3008	4370	3399	4670	2287	4268	3064	1048	3003	3003	1329
Kanga1b	521	316	315	138	121	212	197	261	167	156	201	241	356	977	158	246	390	210	152	480	174	341	192	338	70	96	47	10	85	52	27	31	784	721	194	159	671	695	642	232	561	812	103	40	42	5	653	84	87
Kanga1c	121	111	141	65	94	111	72	106	70	113	72	88	196	319	105	68	202	236	192	144	207	213	212	125	367	285	196	449	160	274	185	158	257	435	413	72	328	185	168	208	163	325	131	269	240	84	134	128	245
Tigger7	830	736	613	816	765	891	818	849	762	1031	892	1066	1962	1008	988	851	1247	1488	1179	1402	1109	1269	993	963	818	854	589	398	515	922	426	675	1586	1084	507	908	1675	1241	1107	1937	1760	1300	976	771	527	469	1565	471	780
Kanga1a	157	225	162	162	136	119	167	167	168	175	92	143	507	199	94	253	147	194	225	362	256	339	200	173	511	581	104	456	242	134	178	231	129	312	196	387	655	1352	353	478	924	495	247	938	637	409	590	432	827
L1M3b	785	1503	1017	2078	1730	1954	1459	1544	1055	1267	1947	1987	1458	1345	1440	832	1094	2810	1198	1858	1658	2640	1461	2080	87	98	244	160	74	199	208	30	719	761	642	129	872	505	59	692	604	39	53	688	61	125	738	173	30
LTR10A	216	190	149	562	657	566	598	732	722	839	501	811	181	589	374	204	150	166	207	40	504	155	217	398	48	72	200	219	224	115	10	256	239	217	100	48	557	219	0	403	442	1175	192	496	631	549	162	755	202
tRNA-Asp-GAY	0	0	0	0	0	0	1	1	0	8	2	0	2	18	39	0	0	0	8	2	12	1	0	0	0	20	0	7	0	11	9	8	27	33	0	49	22	2	71	3	5	13	10	37	22	2	0	1	2
LTR10C	59	94	103	139	137	175	173	193	175	264	229	145	605	259	389	298	312	341	269	286	418	383	330	358	395	629	131	324	25	129	276	165	738	535	439	810	819	2247	1062	672	1077	890	574	2001	159	204	119	140	268
LTR10B	6	4	6	86	56	88	194	221	147	141	128	143	0	14	26	1	7	128	15	2	21	14	9	43	47	10	4	1	59	0	13	29	106	7	59	6	26	130	190	141	94	1	188	164	261	12	1	8	2
LTR10E	53	47	41	50	57	43	61	80	47	93	72	79	176	34	86	7	54	178	212	291	69	41	104	49	43	68	62	171	32	46	20	18	90	787	78	294	798	189	205	169	288	322	114	16	108	11	437	173	61
LTR10D	34	35	14	71	86	62	78	148	123	135	70	67	20	4	4	2	205	165	280	110	213	58	74	177	81	167	168	169	104	161	157	220	121	12	82	91	467	87	191	445	156	52	373	123	63	27	134	241	144
LTR10G	4	2	3	36	18	17	8	7	9	22	23	33	0	0	0	0	0	0	97	9	17	0	1	45	34	47	67	15	7	75	0	0	76	4	26	57	168	2	0	1	2	5	58	0	100	0	212	35	80
AluY	51314	48676	41873	44961	35797	44164	63594	64069	60276	71446	59098	74484	59704	51790	33294	33364	56428	42870	50533	51937	55900	57475	41736	56596	42158	40489	28515	42045	33863	33510	28614	31439	69723	54377	42589	49257	115805	100950	84368	82981	90229	98146	66712	95264	50236	19521	47140	41902	26785
LTR16D1	58	53	46	48	22	24	59	89	37	64	53	73	4	46	23	23	167	66	35	45	61	73	19	24	191	198	242	200	166	216	224	182	113	81	77	64	565	327	269	455	419	305	277	728	495	104	53	476	102
LTR16D2	71	63	47	77	106	113	65	66	106	70	187	135	46	8	238	35	148	412	197	211	117	86	101	16	55	0	1	22	0	0	0	0	63	17	31	63	39	43	22	165	33	5	1	5	51	2	15	16	32
Charlie10b	32	25	18	36	38	49	21	16	28	26	23	12	22	33	61	55	107	167	143	165	49	77	75	50	306	127	85	239	86	127	101	75	266	100	36	237	368	493	386	133	86	214	91	137	8	95	15	30	4
MER57B1	163	161	166	485	486	438	497	579	568	803	424	652	463	566	108	134	507	561	392	512	759	697	519	608	227	149	75	316	54	229	123	152	599	989	528	814	295	318	430	518	360	211	207	311	583	53	303	273	178
tRNA-Thr-ACY	0	3	0	8	5	6	4	10	4	1	2	6	0	43	1	0	0	39	0	0	9	45	10	63	0	7	4	0	0	0	0	0	32	55	0	0	0	0	0	49	18	0	0	0	0	0	0	0	0
MER57B2	317	392	311	485	392	348	437	469	425	548	552	503	113	308	415	466	518	998	707	985	422	340	516	554	336	70	294	273	121	176	238	206	763	583	350	474	1536	724	874	868	1194	1147	351	736	670	122	488	342	137
MamSINE1	1303	1476	1273	1070	1199	1353	1459	1502	2071	2088	1900	2226	1176	1446	510	1390	1119	1612	1310	1898	1230	1514	806	1424	325	410	394	585	172	510	360	465	1042	876	687	979	806	345	727	1088	854	1984	568	882	400	24	783	166	210
HERVL40-int	449	468	395	492	429	685	655	647	570	620	554	692	1835	619	333	1195	804	736	1191	1634	1064	1237	943	1161	399	463	305	320	123	108	315	497	363	1144	249	564	1011	1593	335	702	716	856	378	584	477	113	370	436	146
MER53	1091	1152	996	3845	3294	2781	2971	2969	3325	3546	2041	2486	1895	3116	1618	1500	2516	2943	1908	3075	2724	3222	1941	2849	583	601	473	525	224	388	540	527	1891	1657	890	1247	2075	2766	1331	2347	936	1006	867	2440	1814	280	1140	773	558
MER50	2875	2721	2595	4648	4526	4867	6409	6385	5203	6844	4620	5795	4239	6024	2603	3325	5246	3623	4102	4959	5200	5354	3253	4997	503	770	411	519	611	549	223	441	3927	2649	1877	2236	2727	2570	1588	1977	2084	2307	896	1729	1765	427	2840	750	378
MER52-int	48	45	47	29	33	38	37	58	76	90	98	73	560	5	25	180	217	95	115	34	121	20	169	258	67	57	13	29	164	53	63	74	441	16	35	211	140	1245	124	223	176	643	667	2	98	4	559	44	38
MER87B	150	73	73	149	114	132	195	144	101	182	211	245	249	427	4	29	525	300	295	171	215	211	186	246	76	95	18	2	25	15	30	125	38	120	124	76	22	58	90	129	71	1	75	3	191	25	549	127	13
MamRep434	1314	1452	1080	2118	1943	2285	2563	2829	2028	2850	1783	2187	4462	3689	1745	2665	2928	1837	1336	2031	1811	1701	1295	1657	667	379	434	276	219	312	332	414	1307	1156	838	985	1055	1039	748	1131	813	886	877	814	761	216	297	240	314
HERVFH19-int	24	22	38	25	47	68	101	125	69	68	97	114	28	84	51	111	117	27	71	213	224	52	28	46	21	30	24	58	35	5	22	188	731	495	491	757	12	42	1	161	32	10	24	68	353	21	33	5	6
HERVK14C-int	50	46	44	32	200	119	355	400	475	383	64	98	8	7	6	187	253	194	81	149	57	14	80	41	10	257	11	255	15	29	124	227	296	133	352	162	374	423	562	927	706	197	232	379	1385	63	8	239	317
HAL1ME	10341	8883	6398	10737	7130	7752	7725	8239	8788	9524	11616	13101	6838	7244	4161	4457	5360	6564	4845	7265	6816	7564	4569	6934	4111	3819	2292	3857	1737	1597	1464	2219	6207	7024	3740	4180	5766	4875	3874	5453	4642	6298	2593	4618	3900	4678	4350	4115	4552
LTR28	234	189	233	587	588	681	1618	1451	957	1308	809	1076	847	1126	1123	500	1231	883	1088	1482	1643	1634	964	1533	63	111	61	164	189	81	37	209	252	280	248	364	746	624	59	286	230	149	49	201	4	8	258	4	2
MLT1A1-int	924	194	398	323	269	370	484	493	282	458	215	265	2261	1556	1181	1348	636	881	673	1058	1705	1157	1000	1152	112	237	260	157	64	417	299	600	1564	1715	1112	1282	823	953	1044	1255	843	1026	491	204	236	154	239	124	118
FLAM_C	12833	12054	9623	12736	9470	11284	16471	17415	14750	17825	14463	18466	11936	12765	8505	8970	15578	11383	12898	13235	13486	14491	9251	13663	22159	20261	13017	24354	19325	24192	17093	24787	24486	19089	14289	16878	46766	38004	41111	55752	41254	48836	35500	56791	21808	11661	10066	25716	16565
LTR81AB	74	78	70	155	101	145	127	198	166	239	138	153	115	172	82	79	256	132	221	377	232	219	181	278	16	49	5	2	0	52	18	10	125	7	18	75	141	1	0	62	25	62	0	27	16	0	7	19	3
FLAM_A	5816	5487	4538	6109	4922	5762	7527	7820	6912	8021	7446	8694	9356	6960	4958	4168	7989	6830	6483	8829	8397	8395	6088	8162	5733	4920	3600	6723	3357	4837	3950	4879	9161	8142	5720	5963	13186	11407	12290	10008	14347	10859	6943	12633	6366	3005	5700	5564	3933
L1M6B	3748	2994	2725	1680	1132	2047	1371	1616	1354	1749	1068	1242	1037	1076	511	546	427	489	565	685	915	1074	530	826	124	130	60	219	23	57	68	30	458	446	261	445	252	239	503	458	428	709	164	195	54	59	340	115	34
MER121	156	178	146	284	233	189	388	332	339	463	283	331	468	158	200	294	353	347	211	207	288	306	202	286	51	32	55	12	0	32	3	54	207	76	40	43	112	29	7	112	112	161	25	92	18	12	323	35	49
LTR37B	907	910	696	483	524	533	491	586	566	623	469	531	834	449	256	632	1578	1097	689	1064	763	878	670	1163	148	254	178	48	122	361	174	385	836	381	407	452	570	607	93	279	643	683	77	495	359	22	435	251	122
LTR23	118	179	117	134	157	133	171	168	133	229	145	170	456	263	57	305	283	110	343	199	326	181	99	293	175	89	142	119	165	316	188	139	833	420	457	431	444	535	523	622	291	655	747	281	580	125	335	192	98
LTR22	88	43	46	78	67	102	65	63	62	86	51	53	0	0	4	99	110	148	94	11	173	356	1	160	3	52	13	61	37	2	8	120	41	58	5	243	8	17	21	147	0	44	97	113	51	0	135	13	0
LTR25	747	1018	652	6411	5001	4136	8029	7051	7577	8116	9982	13202	4877	5036	4161	3738	5896	7383	5103	7426	6390	6913	5329	7639	54	81	1	84	137	45	0	62	137	254	183	25	278	180	166	137	12	12	4	1057	13	109	383	82	58
LTR24	16	15	15	31	31	30	23	25	55	15	47	18	29	0	1	31	12	6	48	245	44	98	66	67	28	107	106	51	46	10	45	22	76	71	116	71	268	142	43	185	70	8	6	1	103	164	24	121	50
LTR27	2	8	7	27	21	22	77	71	52	77	45	35	257	17	8	2	5	7	24	54	83	11	30	57	36	4	1	5	43	0	14	1	86	134	42	38	168	1	116	59	22	1	4	0	47	16	282	23	1
LTR26	165	231	225	160	152	191	233	203	179	185	140	179	666	502	157	27	369	346	280	449	330	288	176	517	205	222	387	290	124	60	94	250	1297	594	433	604	478	607	267	1203	899	618	496	568	528	171	913	470	169
Tigger20a	782	726	589	667	599	664	601	759	663	703	537	703	385	681	273	339	766	556	680	1159	981	902	771	743	203	286	533	717	233	216	312	583	851	832	375	805	1565	1398	2241	1018	2251	857	586	1989	1081	567	1300	472	327
tRNA-Thr-ACG_	622	420	314	354	222	321	473	410	259	413	139	211	18	197	207	144	106	167	94	89	133	142	163	182	250	152	212	178	115	295	183	367	255	54	69	106	102	173	148	248	83	306	53	318	30	77	70	134	40
LTR6A	1731	1256	1413	1075	1022	1250	2126	2010	1249	1562	2212	3047	5597	5750	5401	3893	2680	1980	2859	2900	2613	8877	1799	2420	755	902	552	365	293	306	509	691	4565	5614	2311	2563	2499	2190	894	2029	1897	1847	1367	1451	1648	458	7506	1438	944
LTR37A	1270	1289	1037	1844	1727	2038	1140	1128	1281	1452	2442	2887	2391	1606	927	1266	1261	1343	1209	1643	1787	1609	1273	1544	479	549	343	622	379	609	462	566	1943	1698	662	982	2403	1545	1643	1906	1380	1747	1536	1896	665	308	684	573	512
L1ME3Cz	6403	7414	4933	7714	6505	6615	6496	7459	6500	7485	6400	6833	9905	8777	4719	5843	7347	7314	5728	7637	5183	6106	3860	6193	3947	4011	2700	4833	2002	5194	3777	4874	8209	8489	3521	6142	8591	7748	9299	7522	8277	7252	7335	9001	4828	4065	5065	3462	3499
SUBTEL_sa	0	1	0	0	0	1	1	1	0	4	0	0	0	3	0	0	23	0	1	0	7	0	0	0	0	0	1	0	0	0	0	0	3	0	0	1	0	0	0	0	0	0	0	0	0	0	0	0	0
MER4E1	2659	3123	3643	9923	5908	7742	7962	9074	9669	10279	8013	9526	9719	7128	4039	4521	2591	3832	3730	5517	6377	7532	4314	6438	200	348	345	665	381	487	299	815	1836	2444	1452	1128	1039	1335	1696	587	1699	709	547	1204	402	182	476	424	213
MLT1O	2417	1855	1537	1918	1773	2156	2294	2632	2080	2714	2541	2861	4498	4775	2800	3087	5602	4068	4198	3812	5003	5229	2654	4198	1243	1528	1150	1902	973	1293	820	1644	3019	3607	2196	2895	4011	3148	3410	3224	3661	5681	2236	3145	2801	1062	2114	1641	1306
U8	5	6	7	26	15	29	31	28	24	44	20	29	0	0	14	0	4	25	59	13	19	10	19	21	26	6	110	15	3	16	6	42	0	43	8	25	77	0	118	61	33	72	2	80	4	0	0	0	0
LTR10B1	23	24	23	103	92	84	200	168	124	171	154	169	201	135	120	186	33	4	113	120	184	194	153	169	85	55	15	267	73	135	63	34	185	77	28	59	134	122	376	155	135	327	8	270	13	81	0	49	36
U5	16	17	7	19	6	16	40	33	48	38	56	45	32	0	0	40	52	14	35	54	31	25	5	26	97	178	98	177	136	210	122	147	503	102	92	109	298	138	190	171	78	6	267	164	62	26	21	37	21
MER125	9	8	5	6	7	11	9	4	6	2	11	1	2	9	0	0	0	7	17	35	7	0	29	10	0	1	0	0	16	0	0	0	22	64	24	0	21	0	1	0	7	0	0	0	0	0	70	0	0
U7	178	198	185	204	126	186	228	232	179	195	242	262	95	175	6	0	106	143	122	174	94	129	113	184	113	142	147	42	75	113	92	126	70	201	159	151	318	334	284	231	368	106	338	207	85	153	148	321	195
HAL1b	2129	2461	2098	2423	1845	1969	2217	2381	2168	2364	1894	2727	2508	2355	1241	1243	2013	2679	2157	2137	1999	1812	1779	2080	1459	1044	813	1103	430	930	454	911	2912	1201	989	1496	2775	2015	2134	1178	1445	545	507	1053	1926	563	1397	1494	601
U1	113	101	72	11397	12485	6719	16306	16128	20666	21858	5932	7745	585	393	1069	485	511	184	424	306	359	392	264	324	458	154	248	539	697	488	547	404	214	201	259	243	398	423	248	537	361	814	565	163	438	88	25	245	47
U3	1407	1247	1160	597	749	1070	1746	1841	1606	2079	1075	1575	757	1107	488	806	1752	1485	1516	1600	1777	1708	1083	1472	244	208	152	124	83	130	200	413	643	683	264	552	1196	511	559	1142	770	458	832	462	69	37	29	83	29
MER97c	121	91	72	89	85	40	76	90	61	74	101	54	153	46	49	0	0	74	54	84	5	6	29	114	6	23	0	31	1	0	13	1	2	25	0	2	49	1	40	91	69	68	1	2	1	1	38	26	7
MLT2B1	1216	1200	1059	877	780	1009	941	1077	993	1107	789	1060	1302	1620	773	436	1936	1625	1636	1112	1231	1387	1230	1570	173	511	293	250	190	259	264	297	1579	1424	797	962	2129	2258	467	1201	582	525	557	588	1260	366	2226	482	177
MER1A	947	880	729	838	646	758	941	1021	794	990	883	1001	1100	775	407	1171	1998	1365	1272	1744	1422	1123	721	1143	874	743	654	818	622	400	600	669	2042	740	773	1347	1804	538	1084	1903	2113	1381	1304	1603	873	349	1723	550	634
MER57A1	830	971	812	2000	1893	1415	2092	2258	2187	2529	1582	1967	1598	1162	811	581	2080	1452	1255	1382	968	1197	891	1177	166	225	176	466	85	197	154	148	1476	1446	588	739	980	863	451	527	540	608	358	340	353	125	719	249	351
MER127	32	38	21	29	22	20	20	15	34	8	21	20	27	0	1	0	11	80	8	54	23	18	32	36	56	46	11	12	6	0	54	44	75	24	7	38	34	7	27	20	8	0	0	119	12	0	154	23	13
MLT1A0-int	273	290	290	748	642	880	1530	1502	1281	1344	1076	1286	1302	1544	512	409	1313	815	808	783	569	876	725	709	303	620	323	291	181	242	152	727	687	800	238	562	725	706	392	775	1215	1020	427	488	1002	97	899	236	398
LTR86A1	90	102	87	119	146	130	106	149	108	152	121	131	291	112	107	42	230	150	139	278	132	138	156	163	125	235	39	52	132	110	95	162	111	41	27	18	229	26	207	229	496	378	189	118	25	10	352	15	84
LTR86A2	20	27	24	30	30	58	22	43	28	29	29	56	0	0	14	0	16	1	73	77	129	35	67	48	66	22	43	193	107	2	11	64	175	59	175	94	70	0	170	184	133	401	149	346	115	97	31	0	40
MER126	67	98	68	78	48	66	95	87	101	142	67	96	161	5	0	32	66	145	67	61	122	161	78	119	33	53	56	86	14	125	41	23	147	133	75	25	27	142	1	153	159	178	149	227	12	10	12	23	30
tRNA-Arg-CGA_	0	0	0	0	0	0	1	0	4	0	0	5	0	0	1	0	0	0	0	5	0	0	0	0	0	0	1	0	0	17	2	0	0	0	0	0	0	0	0	0	0	0	0	0	0	0	0	0	0
MER9a1	17	19	24	21	24	28	17	23	14	29	15	30	23	23	255	28	133	48	83	147	183	29	53	48	477	222	293	306	211	260	260	504	421	155	149	277	822	729	752	782	1311	749	775	933	449	56	416	149	167
Charlie16a	1183	1326	1111	987	737	804	1062	1136	1127	1251	838	1042	1193	1826	738	1403	943	1396	1099	1404	1451	1181	1011	1326	411	485	265	479	231	256	293	492	718	699	482	419	687	341	506	710	781	894	716	567	686	191	680	417	219
MER9a3	144	133	192	156	175	166	181	181	160	218	210	236	294	307	259	235	685	354	484	499	397	205	294	425	1260	960	814	962	548	679	716	1149	364	565	279	160	2168	2483	2628	1905	2271	3747	1693	2426	2139	549	245	857	490
MER63A	1893	1885	1632	1126	1030	1488	991	1206	941	1278	995	1245	2640	2581	1100	1167	2763	2788	2227	2466	2912	3416	1872	2464	330	346	501	632	324	473	328	535	2178	1196	937	1256	1286	1165	959	1360	1333	953	1034	1510	719	305	1290	669	363
MER63C	63512	85418	45820	74054	33020	49434	70394	84803	106562	129886	90336	97550	96478	84903	76232	56969	41599	35023	32335	36973	32319	45418	21655	29330	10322	20914	16198	8409	7953	6523	6295	10492	76212	78103	48207	50138	26843	26809	9864	11714	14095	14993	6855	7891	5712	2540	30294	2962	3498
MER51C	340	195	202	5391	6092	7050	4805	5070	8614	10186	6868	8123	6560	6049	2483	5703	4054	5162	3524	5678	3693	3436	3119	5115	227	307	323	95	216	193	172	216	854	1168	735	775	1636	1147	853	888	838	963	447	321	357	273	117	264	92
MER63D	530	543	482	418	379	440	428	549	469	608	300	407	1043	921	622	509	305	270	357	440	366	351	332	740	391	231	329	237	162	465	254	312	715	701	294	281	733	928	667	462	903	815	635	1138	917	284	207	485	372
MLT2C1	420	386	328	648	494	569	633	976	654	844	535	687	1048	634	497	113	998	1187	961	1122	699	739	698	671	543	540	395	662	377	862	311	417	2126	703	425	839	1773	747	836	620	1024	718	580	739	1330	65	3608	691	273
MLT2B5	1273	1261	1202	1561	2452	2521	2863	2971	2332	3192	2446	3187	3356	3033	1895	1404	3117	2666	2562	2766	3371	3182	2291	3746	70	179	104	34	3	117	75	83	1462	551	534	626	1167	973	558	1128	774	122	608	559	90	38	69	113	10
MLT-int	89	71	97	131	58	83	114	83	100	73	133	100	197	85	55	20	17	123	137	142	135	74	98	163	27	18	36	28	26	89	4	181	223	55	62	84	223	30	216	256	107	253	207	35	204	55	389	164	49
MLT2B4	976	1379	1086	2014	1568	1747	2442	2566	2195	2801	2679	3302	6664	4050	3217	2003	6103	6422	5306	8607	6629	7582	4399	7449	1640	2360	1004	747	1033	1432	791	1074	4956	3369	2814	3955	3308	4960	1532	3517	2467	2461	1819	3243	1808	335	1835	833	725
AluSq4	6740	6342	5217	5112	4125	4965	9089	9027	8060	9676	7622	9492	5746	4786	3611	3527	6892	5058	5884	6085	6601	7008	4525	6195	6689	6062	4614	6036	5338	5466	4795	4843	7591	5171	4467	4808	11798	10167	8735	8454	9178	9930	6592	9191	8579	4188	6440	8082	5428
AluSq2	40041	37983	31827	36983	28197	33602	49956	52967	47951	57537	45411	57131	41711	36609	26478	25324	45939	32652	35098	40207	42672	43922	28846	40392	33726	31492	21475	32845	26798	27269	24716	28457	50702	38554	30543	36339	83005	82500	59787	68489	66189	77482	52734	63741	40995	16805	28308	34796	22721
MER94B	92	110	103	86	71	87	80	90	58	107	70	123	230	39	188	181	144	178	141	158	168	182	68	190	55	33	23	20	15	75	24	86	307	208	118	150	227	237	53	107	204	251	26	104	100	16	193	61	3
U2	173	165	158	276	221	274	670	635	552	796	194	279	183	378	115	154	357	266	342	301	406	394	138	270	263	130	233	341	227	326	232	328	548	373	347	240	757	301	345	579	782	891	449	550	224	126	278	416	221
Charlie7a	338	289	234	346	317	347	368	363	273	357	301	357	382	361	97	214	543	406	295	442	387	379	329	419	219	163	74	524	90	192	124	184	443	198	171	164	791	581	686	787	773	513	519	1051	247	185	597	654	273
MER45A	961	877	640	902	744	1138	921	1031	1075	1156	1073	1192	1222	1987	719	996	2059	1590	1470	2192	1960	2566	1685	1988	434	545	221	785	375	508	431	388	1127	1441	850	729	969	1346	1675	1251	1732	1746	1275	1143	963	234	954	395	299
MLT1E1A-int	28	42	32	83	40	57	43	70	93	51	58	72	231	278	3	0	6	38	44	63	111	270	73	109	59	37	20	0	0	0	105	32	116	103	30	7	5	0	0	0	0	0	0	0	70	0	0	15	7
MERX	83	77	65	65	40	83	42	49	54	64	52	78	81	282	68	26	156	212	302	238	126	78	36	47	141	49	145	237	103	69	36	169	372	277	119	315	533	137	447	409	127	331	101	107	85	30	276	231	91
MER34C2	271	217	197	164	113	124	195	192	186	189	157	168	237	138	205	74	165	219	229	554	174	351	85	104	135	106	42	63	53	69	17	158	957	296	228	229	274	354	114	186	177	93	433	105	291	18	230	100	168
Charlie26a	1282	1350	999	1275	934	1042	939	1089	912	1150	1255	1330	1619	866	386	585	881	798	691	900	880	1144	614	1019	218	146	221	138	152	86	248	90	726	226	372	172	523	311	71	367	149	95	363	83	317	60	155	64	78
Cheshire	267	319	252	447	213	247	241	271	222	242	556	553	119	308	262	155	474	456	357	404	570	703	318	360	455	480	268	650	406	217	161	185	920	477	409	401	1466	1023	694	830	1108	510	723	543	83	129	899	169	262
tRNA-Ala-GCA	0	0	0	0	0	0	0	0	0	0	0	0	0	0	0	0	0	0	0	0	0	0	0	0	0	0	0	0	0	0	0	0	0	0	3	24	0	0	0	0	0	0	0	0	0	0	0	0	0
MER75B	0	2	0	1	1	13	3	5	3	6	0	2	2	0	0	0	1	106	28	0	6	2	6	0	1	3	0	1	0	1	1	1	1	0	5	19	4	6	1	0	10	0	0	0	0	0	7	0	1
MLT1F1-int	41	24	26	26	41	70	59	57	57	14	47	41	16	384	8	0	309	19	556	2	107	243	184	205	134	46	101	44	2	11	18	50	39	301	86	201	70	73	159	321	256	6	8	23	1	0	28	2	47
LTR7Y	1697	1674	1823	3089	4871	4012	8362	8349	6721	9552	3080	3731	4066	3758	2859	2524	3597	2629	3030	3024	3744	3996	3182	4351	2813	3392	4285	4239	4151	4789	3997	4847	4275	4269	3315	3327	7711	5510	5911	5124	6276	6972	4348	6964	17674	4696	517	12651	7120
LTR1F2	239	201	146	648	284	229	4317	3509	2735	2591	1473	1538	1082	807	128	914	698	2005	1582	2602	2008	3108	2052	2717	0	52	43	56	0	88	23	62	1477	1947	926	1247	643	454	71	424	303	131	70	192	25	1	51	22	21
LTR1F1	55	67	80	106	89	113	180	156	130	224	196	230	182	97	145	22	25	160	240	101	126	397	113	161	19	117	60	3	107	60	129	127	118	127	90	236	282	371	47	311	141	256	201	11	211	22	10	22	10
tRNA-Val-GTG	0	0	0	0	0	1	2	0	0	0	0	0	46	0	0	0	0	0	13	3	2	0	16	0	3	0	12	0	0	10	0	7	8	13	25	48	0	0	0	8	3	3	0	0	14	0	3	15	31
HERVK9-int	98	81	98	70	94	132	89	84	131	159	105	140	311	5	15	31	743	305	246	1377	336	52	343	471	1350	1015	2007	671	592	1008	951	1414	605	1243	848	83	3177	1705	3187	2093	2739	3285	1254	3241	4414	286	1193	748	1199
tRNA-Ser-AGY	0	1	0	0	0	0	0	0	0	0	0	0	0	0	0	0	0	0	0	0	0	0	0	0	0	0	0	0	0	1	13	0	0	0	1	100	0	0	0	2	0	0	0	44	0	0	0	0	0
HERVIP10F-int	139	158	159	338	344	473	580	687	698	760	574	798	396	128	549	59	456	705	671	210	581	886	292	430	342	168	233	545	36	396	158	203	393	546	373	368	651	662	885	379	522	585	1312	867	997	41	423	473	140
HERV3-int	312	214	250	179	146	247	419	333	258	312	245	315	105	298	850	150	802	130	677	768	492	262	419	426	338	1921	896	396	231	458	407	1082	1401	529	1037	928	3616	3724	4454	3160	4634	5409	1886	2607	1466	474	755	1007	365
MER92A	46	37	25	19	25	17	14	32	17	48	14	12	81	0	55	0	0	31	2	0	0	0	6	72	4	12	8	18	1	0	3	15	25	111	29	55	160	2	58	112	1	1	0	5	177	78	916	26	35
MER70-int	54	29	46	45	41	32	23	43	29	53	42	92	0	641	15	107	2	77	116	213	249	53	44	65	138	54	52	4	103	110	98	440	18	312	62	252	530	371	292	690	583	1138	343	545	63	88	54	284	61
LTR7B	2031	1349	1450	2842	3738	3969	6204	6597	5465	7328	2932	3444	4446	4756	2520	2594	4306	2426	2903	2718	3024	3719	2527	3694	3339	4463	7407	5033	4415	6112	5567	6560	6520	6632	3989	4590	12717	10458	10053	6346	10372	8701	6117	11730	20581	4663	929	13473	7477
tRNA-Val-GTY	0	0	0	0	0	0	1	0	1	0	0	0	0	0	0	0	1	0	0	0	0	0	0	0	0	0	0	0	0	9	13	0	1	17	6	59	20	0	0	0	0	0	0	0	0	0	66	0	0
AluJb	95353	85940	74495	81168	59153	72223	103669	108578	95164	111693	95818	120072	94513	88949	58867	52006	114428	79938	88162	97622	101146	104756	71621	95706	74687	76371	49401	79704	53879	59070	49292	58541	127108	96301	74813	87570	185561	169102	140232	137903	151940	161077	104868	158860	82653	37872	72204	76026	50607
AluSc5	9987	9170	8049	8693	7039	8200	13823	13797	12150	14356	11816	14513	8247	7801	6368	6160	10736	7563	8439	9076	10028	10967	6918	9503	8847	8352	6016	8704	6669	7175	6029	6657	12490	8771	6428	7593	17390	16469	11758	12446	12360	14794	10108	12998	10858	5344	9146	10693	6750
SATR1	4	5	2	20	17	24	30	25	20	42	18	68	100	0	16	31	386	47	60	30	111	192	10	66	11	1	1	1	1	0	0	19	242	105	143	45	21	0	0	125	4	0	0	0	6	2	497	2	2
AluSc8	18150	17492	15033	16821	13416	16283	25529	25683	23285	27628	22364	27894	19045	16700	12135	10641	20673	15609	16828	18927	21261	21105	15364	19810	17476	15293	11588	15016	14584	14795	12365	12764	25750	18644	14113	16767	39769	40218	28896	29648	28390	32773	23217	30955	20143	8813	18175	18731	11784
L1PA10	5288	4286	3434	2564	1420	2139	2034	2226	1861	2389	1144	1518	2218	1701	2421	1400	3879	3768	3239	2551	3027	3557	2110	3814	2981	2437	1512	1685	1178	980	950	1981	7930	3751	2590	4299	2635	2095	1395	2728	2322	2280	1369	2423	4137	1012	14116	2123	1323
L1PA13	829	1123	1033	1570	1919	1454	1926	2148	1587	2053	1262	1439	3210	2458	2012	1507	3426	2498	2618	2455	1899	2787	1725	2696	9904	6998	4917	3022	2203	3227	2725	4916	7261	4795	2124	4930	5961	6695	6903	11751	4989	4407	8298	6145	3287	939	15212	3370	1916
L1PA12	2306	2189	2052	1543	1193	1654	2715	3201	2842	3811	2790	3143	2235	1926	853	2207	4067	2164	2915	3240	2467	3572	2004	2862	4831	2936	2102	1163	1383	1234	881	2271	2705	2479	1164	1895	3205	3372	3577	6780	2406	1946	4507	2982	2382	533	8332	1511	457
L1PA15	905	1114	1230	3203	1871	3135	2905	3196	3459	4006	2476	3104	3883	2565	2518	1097	6860	4379	3409	5035	3459	3592	2110	3000	2710	2413	1534	2097	898	1088	834	1914	6774	3926	3582	4886	4567	4943	1760	2780	2899	2319	1798	1730	3489	1126	18949	2590	1498
L1PA14	1270	1094	1049	1117	764	1136	1494	1559	1258	1427	1137	1411	1979	3024	1031	1348	2812	1570	2149	1847	2183	1638	1612	2204	1081	1166	710	1052	178	461	733	746	1811	2162	1356	2134	2577	2102	1356	1554	1384	2458	2461	1086	2125	471	6051	1071	620
L1PA17	738	732	714	1401	1618	1367	1527	1632	1220	1431	1208	1178	2205	1223	1253	900	1675	1494	1608	1793	1449	1076	679	1329	2975	2309	2272	1950	1158	1202	1042	1703	4383	4249	1489	2345	4657	4269	1136	1816	2295	1264	931	1096	4234	1326	5296	2842	1334
L1PA16	2978	3166	2633	4482	3248	3832	5524	6098	4708	5501	3857	4755	6188	9473	2875	4871	7289	5555	5037	5253	4858	6386	3401	6205	4782	3275	3390	3102	1390	2087	1771	3293	13253	8357	5310	6691	8192	5991	3243	4053	4836	3541	3709	3278	4812	1521	22079	3091	1941
HERVFH21-int	195	75	126	87	55	97	317	499	348	350	235	125	675	95	184	313	429	35	355	807	219	163	152	74	262	134	111	381	106	273	81	104	677	185	140	48	282	53	70	94	236	96	325	533	522	342	50	474	39
L1MC	2575	2223	2161	2149	1783	1838	2594	2860	2087	2609	2486	3107	4554	3683	2595	2460	5666	3215	4080	2642	3201	4066	2485	3473	3420	4047	2205	3219	1151	1338	1336	2199	7432	9530	4017	5347	9017	7371	2656	9506	5314	3929	4572	3336	2083	503	2779	1677	1006
LTR43	468	386	336	387	331	308	259	320	219	279	313	377	359	722	79	43	220	150	350	355	486	231	396	277	88	17	7	37	6	20	63	103	801	360	397	585	426	570	6	130	428	20	210	70	862	13	2	246	1
L1MD	3512	3484	3045	3804	3090	3058	3921	4581	3880	4409	3643	4473	9578	6829	4470	3900	6995	6626	4804	5500	7768	6709	3632	5146	2809	2838	1692	3244	1410	1724	1464	1922	13465	7877	4990	7549	5368	3755	3035	3961	3492	6008	2622	3795	2204	1051	4447	1891	1404
MLT1J	14471	14425	11720	9597	9911	12110	18294	18520	14233	17679	16567	21372	27909	25098	13168	15314	29864	24176	21545	27579	24891	26512	19023	26919	4437	6282	4482	5102	3596	3705	3861	4789	15089	13209	7593	10937	15898	13344	9561	13280	12651	15998	8761	9414	7662	1809	7702	3978	2703
MLT1N2	5400	5631	4573	4363	2963	3581	5799	6247	5459	7161	5473	6699	8661	7409	4501	3818	6020	6537	5382	6647	6748	6397	4778	6996	752	1197	856	779	572	670	721	1121	5273	4401	2537	3516	3944	3742	2825	2989	3163	3979	2146	1621	1484	376	2907	737	635
_CATTC_n	1	8	7	22	2	2	29	64	56	1	12	0	0	166	11	0	67	238	41	58	69	208	57	89	308	25	214	23	7	164	45	73	6	231	3	26	41	31	0	42	47	9	35	0	1517	5	95	19	232
LSU-rRNA_Hsa	18956	24606	23227	226733	163194	264458	336512	352634	312287	320280	219438	278994	116233	103635	82321	74166	300457	242772	239454	277665	213326	150850	122132	199528	121361	102711	85336	186361	154098	184286	143289	112846	87890	78347	87714	85918	278814	205830	151701	205994	133363	180272	112255	133942	237143	236810	130699	207458	192811
MLT1H2-int	56	60	43	18	42	68	53	62	14	38	16	29	0	82	39	0	204	67	85	92	84	42	26	38	0	20	32	104	83	7	0	41	570	145	118	242	569	91	71	65	371	41	78	204	269	3	136	0	57
HERVL18-int	137	159	99	226	203	279	204	197	212	288	166	221	78	126	551	337	880	754	345	594	485	603	712	456	16	311	127	7	138	296	3	43	110	107	124	93	140	536	315	833	62	2421	162	813	4	2	1	2	10
tRNA-Phe-TTY	1	0	0	0	0	0	0	7	0	0	0	0	0	0	0	0	67	1	0	0	0	0	0	0	1	4	7	0	0	0	0	0	22	20	11	1	0	0	0	3	0	0	0	0	0	0	17	3	0
tRNA-Thr-ACA	0	0	0	0	0	0	1	2	1	0	3	0	0	0	0	0	0	0	0	12	0	0	0	0	0	0	0	0	0	0	0	0	7	3	0	29	0	0	11	0	0	0	0	0	0	0	0	0	0
MSTB2-int	5	3	8	9	0	4	8	10	10	20	6	1	20	0	0	0	1	263	10	0	69	80	3	5	0	0	2	0	0	0	12	0	10	0	14	10	0	0	0	48	9	0	3	0	0	0	0	7	34
MamRep137	3737	3354	3124	2780	2467	2853	3200	3679	2699	3271	2774	3126	2437	3823	1604	1226	1580	2177	1970	2888	2462	2530	1610	2022	611	930	584	737	171	205	280	513	1566	1818	839	1155	1466	587	666	1335	1085	1125	1128	889	1057	490	394	735	552
MER66B	824	628	648	1201	818	1451	1019	1195	1138	1158	895	856	1706	1106	2164	798	2085	1380	774	1404	1447	1542	1031	1495	525	405	583	389	324	470	351	333	1298	945	695	1201	2359	1312	984	453	1150	1153	993	701	827	369	891	381	349
MER83	90	41	65	93	110	163	148	151	135	204	129	173	560	462	138	0	67	25	170	114	215	122	135	277	146	25	63	176	7	36	192	29	150	208	67	56	87	0	295	121	9	125	2	123	85	25	22	197	83
MER91A	1220	1082	1085	886	833	1083	995	1023	1010	1268	998	1188	1726	1933	815	484	2494	1867	1757	2450	2496	2556	1637	2359	562	556	282	279	314	382	336	612	1340	971	607	839	603	1345	801	1209	1180	596	601	765	630	63	703	455	303
MLT1J-int	289	260	269	504	216	346	339	391	339	460	412	574	404	397	91	424	1637	761	786	861	505	591	470	681	211	115	96	53	146	96	78	113	795	330	254	447	615	252	141	419	466	558	169	125	170	193	2762	157	68
MER45R	195	222	240	205	150	187	220	178	129	173	223	211	177	547	43	506	183	440	448	424	246	298	190	267	114	58	0	0	125	83	20	43	222	192	114	136	107	28	22	361	33	139	78	71	15	4	124	22	23
MER4D0	1695	1219	1677	1251	837	1347	1500	1583	1831	1985	1556	1920	2261	1717	1416	1898	2096	2597	1984	2816	2093	2302	1334	1754	252	190	217	49	86	365	8	54	620	382	183	440	231	1031	42	280	607	16	233	270	187	227	70	148	47
BLACKJACK	1723	1811	1060	1485	1201	1197	1718	1819	1206	1703	1455	1676	2304	1211	966	885	1635	1155	1301	1649	1476	916	704	1175	439	317	192	658	194	125	94	298	1435	1056	486	668	560	1215	390	777	713	554	118	439	420	246	1213	444	265
MLT1A1	5039	4091	4018	8405	6020	6301	14217	14077	10804	13759	10252	12575	15955	12811	11956	10351	11304	8884	9115	10201	10529	11066	8032	11608	2342	2720	1955	2021	1594	1928	2234	2409	8970	7558	7055	7862	6752	6757	4413	6186	4817	5607	3579	3988	2590	1079	5385	2039	1933
MLT1A0	5461	5257	4766	9298	6612	8864	13035	12867	11614	13544	9811	12469	13080	14553	8638	9806	14161	11443	11341	13384	13537	14464	10317	14928	3421	4434	3280	4456	3081	3164	2473	3397	13394	9533	6109	8639	12430	12170	10578	10288	14170	13080	8592	12068	5356	1886	11494	3905	2849
LTR14A	1016	804	795	1377	1282	1268	2525	2610	2602	3238	1907	2224	2737	3338	2310	1624	2846	2452	1832	2588	2529	2541	1904	2975	375	331	293	329	176	310	252	374	1078	599	588	797	1611	1374	677	1213	1183	1240	996	1256	420	159	486	567	361
HERVL-int	35	35	26	56	46	86	190	214	138	84	129	144	261	1204	122	327	1516	852	1315	962	614	501	448	718	226	1091	703	820	903	948	410	701	20808	1677	1400	12961	3761	1942	4215	3398	3988	1564	1332	2568	2108	155	11673	418	367
MER91C	1771	1602	1109	1057	945	1224	1245	1438	1127	1374	1565	1947	2973	1995	1614	1580	2115	1994	1678	2153	1734	1953	1387	1794	163	277	209	194	157	168	122	311	1604	1024	549	715	982	836	469	1005	742	627	343	505	162	160	211	260	150
L1MA5	1039	1373	968	3818	3025	3128	4301	4162	3806	3883	4924	6041	4436	4587	2689	2883	4160	4290	4324	4356	4909	5665	3941	5426	1301	876	944	966	436	1070	544	848	2854	2340	1192	1887	3167	2476	1116	894	1573	1513	398	2029	2171	596	3936	1034	676
MLT1N2-int	7	10	6	5	13	9	22	13	5	9	4	14	6	31	69	20	28	97	9	8	52	4	49	14	34	6	14	39	5	25	18	46	11	111	57	38	0	15	27	14	3	11	0	0	6	3	240	9	10
U6	188	195	154	309	230	252	427	524	435	449	357	511	299	384	237	93	416	297	361	411	344	281	284	353	402	568	235	455	329	308	286	467	529	478	407	465	857	664	724	509	828	481	270	572	528	295	506	463	263
L1M2a	86	102	137	323	223	463	296	283	308	272	324	296	447	1396	1358	1046	1312	720	1002	965	885	816	612	1003	17	404	152	4	405	300	216	393	819	869	286	180	561	155	81	225	5	95	27	2	165	7	1110	106	82
MamRep1879	184	150	168	297	193	320	253	289	303	308	275	326	364	627	225	264	634	513	397	341	644	785	430	511	216	282	247	229	271	247	199	308	605	560	422	601	510	384	493	630	578	315	336	848	408	257	708	280	236
L1M2c	115	123	77	170	93	105	55	94	89	92	114	118	2	772	57	19	359	307	234	281	179	99	147	152	483	129	62	191	163	544	54	65	742	290	584	254	218	949	441	425	706	1216	104	704	698	5	831	128	18
L1M2b	71	97	73	77	77	73	87	66	103	171	42	82	407	360	366	493	228	242	127	3	122	183	18	218	13	28	11	1	0	19	2	1	248	2	105	59	183	2	1	1	20	56	2	1	71	0	11	78	107
LTR22A	368	284	464	716	634	854	1305	1193	935	1256	850	1013	804	888	808	481	631	325	495	516	742	605	521	873	54	234	65	56	124	1	59	26	144	187	176	213	152	650	238	269	349	101	133	36	146	14	1	97	20
HERV-Fc1-int	35	22	13	17	9	10	18	26	21	17	20	38	50	90	39	83	27	29	9	65	87	25	42	37	175	33	21	16	0	0	32	18	60	24	3	20	381	471	16	178	308	920	142	14	362	0	773	323	1
AluSz6	27481	24484	21124	21492	16801	20459	31808	32239	29344	33723	29383	36365	29572	28457	17397	16962	31887	21304	25231	24778	27226	27793	19935	26343	27329	24421	16835	25102	18366	20383	17347	19706	42295	32070	23692	28716	63737	55531	49181	45144	52867	55908	33757	51437	34777	16438	28852	31405	19782
L1PA8A	147	234	249	415	298	433	542	542	495	463	356	440	608	783	791	580	2516	705	1515	649	621	903	496	684	1510	1299	1139	998	609	532	689	1252	3391	1422	981	2421	2720	1311	882	1072	1153	1161	1477	1499	1744	371	8078	1254	487
MER68B	41	33	18	43	30	25	40	52	59	64	45	32	28	71	168	146	112	81	120	155	34	192	57	166	295	98	105	147	41	151	88	173	348	221	133	138	530	259	2	277	224	226	132	319	84	35	259	122	191
MER68C	10	9	10	8	4	6	4	11	13	2	18	4	0	119	43	0	13	0	17	1	1	30	31	0	112	46	159	112	3	0	32	29	217	213	63	57	253	596	19	308	347	12	138	215	148	86	43	69	19
MER83C	299	195	189	411	339	303	419	533	363	641	380	538	337	150	10	456	699	529	492	590	524	365	387	525	1	148	80	83	5	4	39	69	309	128	97	135	467	305	99	153	141	35	5	4	135	35	3	60	55
MER52D	59	66	40	75	119	280	120	122	115	132	178	188	252	689	473	577	408	79	204	1107	636	510	205	518	167	789	47	26	352	42	71	37	862	475	309	436	991	583	489	198	286	37	230	90	159	11	806	58	49
AluYd8	1207	1089	944	1044	770	908	1819	1816	1600	1911	1489	1959	1008	910	658	641	1262	801	1011	1008	1123	1176	770	1027	1158	1090	869	933	922	942	786	766	1330	1040	862	1002	2462	2113	1779	1670	1676	1852	1381	1889	1190	530	1113	1253	765
MER52A	1531	1441	1452	1175	1199	1807	1809	1750	1571	1651	1494	1748	2072	2680	1160	2075	3675	2454	2787	3502	3113	4512	2270	2471	640	1055	832	547	616	361	419	388	1970	1758	1327	2208	3016	2628	4263	1372	1842	1354	2085	1201	3603	170	2450	995	398
tRNA-Trp-TGG	0	0	0	0	0	0	0	0	0	1	0	0	0	75	4	0	0	0	30	0	0	0	0	0	0	12	0	29	0	25	38	32	163	63	34	179	39	1	111	0	67	5	0	262	57	2	60	24	1
MER52C	205	228	167	306	207	302	377	400	332	434	256	288	826	1244	792	516	1507	341	640	794	735	914	389	682	162	121	228	279	411	73	272	106	529	163	319	679	1363	1649	698	1506	2153	2674	210	733	2506	7	475	926	264
L2a	61419	57520	49167	75441	62156	75061	89252	96118	88378	102710	84818	100562	114496	94913	61149	67967	115341	106322	89496	120319	103625	112241	75353	104076	48239	47365	32895	50272	30872	38426	31649	41168	114056	89332	56225	70944	106727	104162	80053	98649	98280	104822	64875	92722	56116	21653	79138	43582	27175
L1M3	5676	4054	3682	5779	3547	4717	3814	4353	4402	4922	4901	5410	6753	5447	3144	2123	6543	5160	4883	5471	6397	7859	5691	7071	3118	3633	2195	3192	1837	2621	1485	2508	5995	5180	3261	3714	5832	4565	3028	4132	3812	3143	2388	3622	3742	1807	5777	3020	1809
L2c	45390	44742	36690	55190	48094	58037	63760	66127	62213	73254	61819	73142	86934	79750	49263	54649	87763	76403	68658	89791	83739	83393	56466	79944	37935	39688	26507	40762	26229	28893	25333	33389	76482	70876	46330	57784	83031	76450	59031	73129	69910	78437	45576	67122	45597	17852	54588	33875	22658
L1M1	7485	7603	6278	10229	8116	10233	10011	12086	10594	11938	11747	13748	17645	13381	7942	9772	17142	15094	12358	17565	14440	16265	9045	14348	9299	8660	6970	10394	8450	7786	7439	8073	19139	15748	8061	8337	16152	15074	7335	9065	8168	7221	4660	8671	19979	12646	25785	12245	11157
L1M6	2054	2471	1744	3453	2098	2020	2367	2179	2184	2469	2236	2225	3093	3429	1503	2082	2176	1996	2047	2334	2154	2554	1658	2024	951	1173	729	842	716	1103	552	931	2752	2565	1103	1445	1529	2306	1070	1376	1209	1340	734	723	2284	1207	4732	1717	1096
L1M7	3505	2686	2073	2210	1969	2369	2271	2667	2235	2781	2367	3235	3480	2415	1509	955	2006	2755	1830	2851	2352	2670	1517	2252	1107	1630	887	1324	327	825	538	955	2263	1810	1020	2186	2526	3192	1084	1654	2239	1211	507	1621	1044	377	2710	1159	271
L1M4	14555	15321	10831	12736	11893	12076	13459	15279	12902	14709	14358	16288	19166	17125	9574	10275	18817	18707	14793	21715	15613	18191	12152	16818	7756	8388	6394	8511	4633	5122	4840	7591	17967	14502	7994	11461	21556	19558	12737	14124	17898	19165	7839	15053	9398	2714	14937	7160	4379
L1M5	38889	37791	29572	31932	27907	30574	35527	39106	36194	40409	45333	52331	39903	34131	24243	25115	43791	34246	35820	39184	36620	38063	26257	36557	33538	28804	22080	38746	24444	24897	25937	36068	48632	37193	23926	29058	48101	50765	60721	61140	65137	61238	39420	59561	28778	13014	24116	29106	16120
MLT1G	2256	1957	1523	1653	1140	1548	1540	1766	1442	1844	1486	1639	2528	2743	1642	1903	2821	3047	2662	3780	2373	2053	1658	2990	607	1018	385	945	425	316	370	522	2350	1928	1292	1582	3096	2338	1425	1927	2050	2229	1516	1035	1241	246	2280	449	188
MLT1F	3848	3576	2835	2612	2276	3224	2940	3141	2769	3579	2535	3129	5847	4458	2632	3109	4001	3565	4627	4163	5263	5145	3639	5647	2179	2267	1438	1851	1163	1332	1547	2037	4989	3872	2711	3898	4527	5285	4401	4702	4915	6024	2751	3277	2982	983	3853	2376	1276
L1M8	258	319	221	576	401	400	811	969	617	734	509	682	352	386	119	207	396	568	425	603	498	402	278	465	420	582	365	461	209	354	520	276	1385	636	574	759	1463	1583	897	661	963	944	536	1015	1340	73	886	627	177
MLT1D	15320	12989	11161	15876	14204	14213	20140	20671	18176	22407	17610	21683	27171	26238	15206	15773	25734	18983	20726	22842	25032	29462	18122	26121	6354	8877	6847	7879	5502	6527	5735	8473	26540	18778	11649	18669	24128	22060	16609	21284	20747	22900	15936	20882	12938	3695	26504	9190	5190
MLT1C	24364	19985	18281	20226	17468	21069	32701	31430	31019	35560	39239	48732	49138	45337	29691	31249	52391	43883	38622	49146	57371	59408	43389	64057	7604	9617	8051	10126	7688	7940	6820	10873	38734	34659	20573	27305	42008	36109	25898	32975	28320	38840	20971	30257	14581	4212	13883	9198	5662
MLT1B	6018	6365	5585	7463	5816	7324	8773	9135	7659	9263	7712	9837	13295	9722	6937	7489	13539	11792	11004	13427	12902	15253	9349	14986	4082	4968	4506	5422	3215	3962	3373	5129	14716	8640	5798	9237	13828	13035	8500	12122	10517	12435	8012	8081	8592	2032	11186	5005	3178
MLT1A	2261	2343	2296	3082	2359	2935	3970	4562	3643	4765	3268	4379	6593	5903	4647	3175	6996	6664	5536	7743	6629	5629	4916	6643	1875	1932	2128	2001	1789	1759	1455	2643	8119	5252	3769	4338	7974	7358	3672	7225	6285	6857	3964	4654	4198	1220	5815	2376	1967
tRNA-Ser-TCA_m_	583	1756	1413	10616	16404	18259	5693	6059	19040	13709	14645	18380	12216	12524	9951	9706	60278	60346	49152	61184	44103	35104	27574	50300	13799	5742	10925	11851	9017	11134	11686	11856	9711	10413	8617	8862	23512	18381	15138	20025	18344	14021	11282	16668	33985	18569	30573	32345	29657
MER4A1	1447	1206	969	3635	4331	2333	4713	5248	4858	7133	4476	5451	3208	3662	1402	1938	3631	3223	2533	3883	2964	3733	2156	2997	574	1022	658	1201	474	760	623	866	3291	2429	1516	1819	2230	2085	1634	2998	2129	2202	2051	1374	2196	490	1839	514	452
Looper	215	173	102	155	80	109	93	129	92	142	127	154	302	4	186	6	113	95	99	228	237	50	264	157	613	517	127	821	486	862	262	415	760	980	865	806	501	385	884	1059	1181	1699	256	1458	564	213	666	440	358
MLT1B-int	152	178	177	638	451	461	908	821	681	879	491	677	1230	438	1403	449	1206	835	1283	1642	939	1945	917	1828	261	278	164	294	205	389	102	456	1075	433	273	581	752	1628	831	400	654	1207	560	294	215	113	683	204	372
LTR9B	273	268	249	366	245	329	467	441	326	433	358	497	398	650	340	112	884	315	458	516	694	694	440	756	335	317	226	388	341	207	185	190	645	469	499	386	713	1261	427	558	538	227	223	544	767	170	523	489	115
LTR9C	79	56	37	96	56	97	34	49	38	81	63	32	56	218	224	293	33	3	109	69	108	380	137	53	52	107	28	256	27	31	17	34	34	231	112	499	53	168	42	266	1	446	122	67	36	14	324	0	0
LTR9D	366	307	288	522	434	506	1032	1013	764	1005	777	1015	604	1156	1020	377	1852	1312	1015	884	1743	1396	834	1774	63	174	137	145	87	289	78	382	741	476	670	654	740	400	357	224	273	535	94	569	993	108	477	413	232
MADE1	456	505	376	664	464	612	664	752	803	1014	582	726	1512	1170	634	713	1314	1217	1133	1481	1004	1053	768	1165	469	404	222	506	242	271	222	484	1129	924	508	544	1590	1467	823	502	1223	685	404	708	919	161	960	342	168
MADE2	576	754	507	766	631	749	759	894	755	885	679	871	840	843	502	1075	848	953	637	985	1097	1180	691	953	443	396	214	334	143	389	229	291	767	737	411	507	1004	504	548	433	1075	466	365	888	146	107	451	220	198
AluSp	44151	41085	35559	39049	29893	37940	55659	54545	48150	57406	48439	59993	54745	47137	33717	33253	46072	35944	37047	40678	47687	53125	34313	48191	35365	34862	24377	38313	29831	29749	25376	27702	55314	40100	35090	38300	89410	81782	64608	70330	66085	81344	54944	79300	45375	20155	26798	37565	25854
AluSq	17331	16209	14147	16508	11732	13843	23934	23448	21681	25905	20651	25993	18057	16876	13091	11956	20159	13796	16515	17508	20398	20081	14058	19125	16344	15345	11168	14917	12895	13309	11246	12127	21803	17950	14485	16349	39141	35386	28278	27142	28467	33917	21049	32250	21649	9505	16997	19471	12595
PABL_A-int	1990	2808	2035	460	650	625	605	633	442	559	558	547	1228	519	409	260	739	927	743	1083	605	329	314	489	319	441	213	810	238	174	185	350	263	402	216	163	276	474	1156	723	1048	896	543	1021	406	42	367	177	223
LTR33C	292	346	416	438	290	431	491	522	550	699	360	538	621	863	392	415	1031	414	595	957	812	851	480	821	124	48	307	179	55	67	110	82	365	445	181	131	708	245	139	573	247	74	147	571	47	158	802	81	165
tRNA-Lys-AAG	76	203	91	83	41	44	51	49	68	34	75	51	21	1	4	0	14	23	26	25	2	2	28	38	0	8	0	4	9	1	36	3	4	1	24	26	0	0	61	72	0	125	12	1	1	5	8	2	0
AluSx	71188	66939	57029	63269	48892	57603	88040	90795	83222	98045	78587	98744	76879	71222	48133	46095	82716	60303	68138	72377	77101	80495	56471	77583	74055	67123	48520	82821	58887	65193	53712	65601	106143	77158	63392	74919	189730	175247	158262	141796	157958	175782	105833	175970	83496	38622	52971	69269	46515
AluSz	61395	57127	46666	55236	44046	52047	81483	81548	72201	85456	66307	81785	64241	56769	40497	41192	68622	47802	54511	59704	61178	64850	44312	59682	54967	52960	36576	53646	40088	43657	38004	40645	82354	59343	48242	58664	125216	117448	103006	102943	109039	118453	80338	113072	59821	28809	49125	51881	37411
Ricksha_b	70	83	60	71	57	72	67	35	37	36	103	53	1	0	3	291	29	237	79	15	64	0	165	71	132	18	8	5	4	7	27	48	649	165	15	0	68	62	378	0	8	0	118	1	490	14	85	80	0
PABL_B	70	56	48	81	63	105	108	104	109	158	77	93	139	438	36	60	78	163	186	64	119	151	46	189	82	110	70	110	181	139	49	112	248	222	109	223	394	118	282	470	235	303	168	36	241	53	129	104	134
Charlie20a	45	97	99	67	72	118	143	154	141	140	96	113	473	289	111	176	58	92	339	60	242	234	147	160	179	368	83	264	72	189	71	252	509	315	268	90	339	581	100	281	719	632	133	329	468	83	560	238	150
L1MEh	2147	1768	1449	1918	1255	1700	1749	1689	1645	1691	1260	1656	1577	3465	2507	1646	2403	1799	1538	1487	2039	2402	1368	1673	601	624	798	1162	538	522	473	504	1350	1512	919	871	1779	2593	1451	1044	1462	2123	685	699	824	199	1072	466	271
L1MEi	6040	3946	3712	2969	1965	4914	1549	1819	1342	1593	1628	1800	5509	6477	3652	1970	6782	2877	4714	4543	4512	5193	3000	4206	2083	2555	1327	2080	1246	660	795	1216	4460	3760	1914	2848	3552	3414	1671	5498	2590	1381	1568	1952	1134	309	2279	786	466
L1MEj	1797	1963	1814	2022	1322	1898	1626	1843	2101	2670	1879	2175	1734	1026	1011	875	2056	2308	1649	1793	2387	2645	1115	1800	982	1577	592	520	340	556	159	834	2766	1170	1339	1188	1232	1809	2101	1320	845	753	850	756	732	201	2705	581	448
AluSc	43703	37627	32610	39730	30226	43981	53613	52882	50485	62689	39589	49475	50955	48512	37479	30005	36925	27448	28951	32212	42193	44378	30268	43597	22360	21024	14793	19984	17237	18667	15665	18478	37452	29402	23441	25222	56398	45511	40097	45462	47698	53467	36459	48922	25750	12173	24571	24209	16109
L1MEd	7462	8511	6092	10038	7953	8091	9678	9956	9666	10260	8716	9778	11434	11705	14604	7481	11281	10579	8772	8698	8298	10899	5827	9167	8095	8917	5669	7627	4047	5632	3506	6134	12972	11673	6462	8104	16749	11785	9603	11322	12961	9720	6513	12061	8370	4392	14234	7129	5205
L1MEf	6934	6748	4843	6506	5789	7491	5996	6361	5522	6434	5951	6894	6362	6822	4321	4887	5871	8648	5470	8902	7492	8000	4606	5663	4956	5360	3552	5245	2755	3318	2302	3140	8218	6645	4357	5479	8926	7992	6284	5918	6486	8077	3281	5924	6325	1985	12343	4473	2031
L1MEg	6863	7989	4619	15295	10085	13227	15348	15904	17576	19201	23301	23512	31336	23220	14418	16930	12506	15936	10214	14474	11575	15766	8339	11113	6408	5012	4568	5642	4508	3362	2748	3939	28978	17275	10708	20607	11416	9491	7720	8263	8316	7162	5328	4477	6682	2017	10849	3069	2396
L1MEa	183	99	147	158	77	75	120	99	113	78	80	68	159	391	101	271	32	160	213	8	100	193	163	36	145	126	131	106	352	123	39	36	135	85	50	27	160	164	513	114	262	495	169	159	147	99	1095	55	2
L1MEb	5495	3934	3281	2696	2517	5064	2052	2154	1787	1701	1701	2327	2648	4773	2291	3311	3282	3273	3080	4130	4002	3389	2533	3401	472	677	444	700	294	230	352	600	2032	1405	1142	1642	1437	1664	1006	1469	1043	1137	918	1446	603	201	1772	775	362
L1MEc	5182	6158	5014	6922	5249	5734	7174	7663	7076	8136	6720	7295	9053	6704	7141	5002	9065	8156	7197	9546	7299	8282	4645	8930	6538	6186	4743	6559	3183	2886	3354	4463	17252	10571	7181	8150	11958	10691	6569	8489	9917	6544	4799	8072	6114	2669	14401	5049	3486
LTR76	160	139	163	195	192	252	188	216	253	248	239	208	21	112	5	0	189	395	260	103	160	363	331	138	6	32	11	56	39	4	103	180	245	686	159	193	490	80	182	15	224	307	32	345	20	97	26	74	83
LTR77	1	3	8	16	13	15	29	41	31	5	39	34	40	2	1	0	62	6	20	46	0	2	4	30	75	46	9	0	2	0	4	32	0	0	0	45	34	238	6	26	34	64	8	91	55	8	165	78	6
LTR101_Mam	169	154	164	266	162	305	199	291	210	228	207	251	483	235	373	553	292	296	381	396	620	413	249	409	344	486	173	195	115	158	203	244	561	123	240	188	246	483	355	675	270	83	575	362	136	40	1553	149	102
AluYc5	908	818	707	815	586	686	1418	1428	1239	1480	1140	1499	829	712	496	493	1032	604	773	748	809	872	580	770	905	869	682	766	722	756	630	621	1114	858	695	824	2031	1748	1382	1375	1361	1535	1173	1583	997	425	853	1034	604
LTR47A	174	136	123	185	130	186	175	258	232	256	184	190	34	54	25	2	273	285	163	254	214	313	135	389	215	202	155	489	197	473	150	203	649	335	166	190	572	835	358	417	380	128	223	229	245	99	312	287	127
AluYc3	2638	2321	2092	2407	1736	2003	4020	3926	3430	3968	3277	4179	2230	2166	1477	1504	2428	1767	2087	2218	2419	2396	1694	2244	2187	1986	1550	1867	1588	1739	1534	1462	2694	1934	1789	2097	4880	4106	3504	3193	3092	3828	2582	3956	2422	1057	2255	2426	1485
LTR70	421	259	303	245	197	273	246	298	207	254	220	327	160	267	350	621	190	90	256	48	151	175	81	389	1110	1484	2257	1441	1431	1996	1094	2186	2040	1396	990	1116	3775	4034	4963	5304	3075	6282	5202	4455	3866	1342	365	2998	2259
LTR47B	0	3	0	1	0	0	2	2	8	10	2	0	0	0	0	0	95	8	1	5	39	117	0	8	0	0	23	0	0	0	0	0	0	2	7	0	0	11	0	15	0	0	0	0	0	0	0	0	0
tRNA-Glu-GAG	0	0	1	0	0	0	0	0	0	0	0	0	0	0	0	0	0	0	0	0	0	0	0	0	0	0	0	0	0	0	0	0	0	0	0	0	0	0	0	0	0	0	0	0	0	0	0	0	0
Tigger3d	439	495	453	281	248	199	229	289	273	284	329	388	511	696	81	235	129	272	420	549	296	330	299	603	301	265	287	180	60	102	123	123	228	350	67	143	1124	848	446	616	442	979	325	750	346	173	170	138	67
Tigger3c	720	706	473	512	412	508	449	597	513	621	503	696	874	1114	616	983	1549	1430	822	1248	1367	1304	855	1083	596	841	409	987	531	494	744	600	1231	923	561	951	1464	1044	1204	966	955	770	314	1061	563	182	1242	473	361
MLT1E1A	4307	4749	4536	2337	3422	3260	4795	4610	3787	4365	3221	3883	4271	6297	3384	3425	4522	4278	3754	4633	5119	4916	4035	5332	898	893	888	1259	1172	604	800	1657	4791	3388	1716	3153	3389	1701	2697	2516	4586	1214	1518	1769	1940	338	3869	719	338
LTR78	3397	3978	3618	2380	2205	2673	2967	3010	2362	2815	2300	2799	5899	5351	2191	2903	3300	3890	3622	4571	3623	5089	2385	3591	1015	1406	580	690	446	653	773	1172	3686	3149	1542	2416	3230	3189	4463	2708	2203	3896	1828	3860	3137	320	3076	880	689
LTR79	2822	2341	1825	2603	2191	2565	2897	2977	2754	3255	2534	3009	4281	3967	2652	2546	3980	4181	3909	4727	4518	4061	2724	4033	1230	1173	678	720	182	615	496	753	2691	2084	1096	1872	2472	2920	1297	2108	1992	2489	795	1903	689	253	2104	698	300
tRNA-Tyr-TAC	0	0	0	0	0	0	0	0	0	0	0	0	0	0	0	0	0	0	0	0	11	0	3	0	0	0	0	0	0	0	0	0	72	31	16	48	0	0	0	0	0	0	0	0	0	0	12	2	0
LTR67B	2091	1894	1702	1397	1351	1642	1568	1879	1479	1674	1400	1839	3699	2454	1395	2724	2460	3430	2497	2805	2777	2966	2341	3478	8581	9563	7948	8476	10482	8675	7727	7881	3776	3117	2095	2640	10216	9813	9803	18274	10937	10321	10082	11929	7214	4458	1451	6871	5089
MSTA1-int	0	0	0	0	0	0	0	0	0	0	0	0	0	0	0	0	4	66	0	0	0	0	0	0	0	0	0	0	0	0	0	0	2	0	0	0	0	0	0	0	3	0	0	0	0	0	0	0	0
MER113A	269	304	256	341	276	288	294	285	257	332	272	438	120	670	161	303	437	530	328	445	150	405	285	262	222	235	166	237	122	183	240	252	470	604	241	278	385	566	499	503	357	153	456	73	317	250	538	300	262
MER113B	177	252	163	185	120	130	166	191	136	170	191	199	289	201	139	257	178	268	256	263	217	276	161	268	99	47	25	79	70	29	20	55	178	110	95	152	296	70	162	188	287	77	89	73	27	37	180	74	55
tRNA-Glu-GAG_	6	0	0	4	3	3	3	3	8	8	12	2	0	0	0	4	15	0	38	0	6	0	25	4	0	1	1	4	0	20	27	0	13	1	4	6	17	0	0	19	0	0	0	0	0	2	76	10	2
MamRep1527	255	311	244	371	293	387	304	376	352	342	278	363	597	558	298	323	726	601	623	829	737	651	470	707	155	159	62	133	11	84	95	172	281	355	119	256	368	271	131	327	300	123	193	421	334	93	606	330	44
MER1B	3237	2890	2750	1383	1371	1653	2164	2262	2299	2654	2822	3545	4074	4996	2251	2692	6935	6450	5181	6762	6439	5952	3989	5727	1969	1863	1023	2183	1467	1586	1380	1526	4234	4400	1435	2326	6360	4383	5809	5227	6760	7388	3662	4287	2559	471	3222	1271	981
LTR1B1	70	100	48	50	58	96	56	41	43	75	97	163	189	219	154	171	283	204	339	218	158	292	107	249	72	4	7	6	8	7	6	21	12	67	38	2	44	19	2	77	91	157	8	10	11	14	211	2	3
LTR1B0	115	97	67	27	38	26	43	78	82	74	49	64	91	47	8	10	11	16	44	226	196	87	124	142	6	2	17	1	4	0	0	2	100	15	54	32	8	496	1	5	146	31	0	136	239	1	400	13	0
LTR37-int	271	415	299	492	477	623	687	798	731	504	738	854	426	1411	9722	747	620	622	696	798	738	498	512	721	1379	719	2189	535	468	1777	637	1011	1652	386	489	339	1350	2041	1216	1293	1560	1614	1546	2521	710	525	1775	1344	829
Harlequin-int	1984	1510	1626	1112	943	1184	2003	1997	1506	2015	1235	1521	1372	1136	767	1300	3774	2624	2281	1844	2388	3121	1496	1782	1565	2097	1423	1895	1012	1219	1306	967	3874	2049	2222	3443	4239	3735	3125	1823	3018	3951	1452	2398	2932	884	1848	1665	926
LTR88a	1091	968	1050	689	468	773	889	932	790	1242	750	1040	2134	1156	769	1501	3193	1807	2221	2727	2330	2194	1431	2048	279	451	327	545	355	297	322	614	2126	2143	1492	1859	1705	1284	798	1708	966	994	720	948	959	228	450	425	301
tRNA-Ala-GCG	0	0	0	0	0	0	0	0	0	0	0	0	0	0	0	0	52	0	0	0	0	0	0	0	0	0	0	0	0	0	0	0	0	0	23	6	0	0	0	0	0	0	0	0	0	0	0	1	0
L1ME5	1327	1427	1137	2398	1503	2258	1539	1953	1738	2045	1581	1802	3106	1275	955	892	1941	1915	1174	1591	1919	2415	1007	1937	718	968	805	843	584	845	644	618	1529	1740	656	962	3117	3087	3394	2644	3676	8567	1370	5137	1588	646	2141	1640	990
HERV16-int	631	517	447	667	550	718	556	730	536	872	504	755	921	1009	1071	820	904	1356	824	1168	1201	1546	938	1073	183	232	89	114	140	135	64	135	937	795	220	300	627	286	529	434	476	241	302	377	411	56	783	109	14
L1ME1	18691	17856	14074	17285	14128	14306	17324	19271	16775	18583	16458	19380	23702	19681	11425	11371	17944	16982	15005	23729	16808	20361	11953	16663	10992	12494	7507	11213	5319	6455	5837	9455	22654	21661	12430	12857	23244	19883	17366	17229	17012	13822	10178	18313	15015	4973	23544	10008	8398
L1ME2	4572	5532	4066	5594	5067	5145	4679	5337	4872	5810	4618	5333	4487	6628	5314	3838	7452	5536	5709	8186	5180	6953	4118	5243	3517	3523	2638	4933	2125	2762	2771	3594	7120	6464	3860	4196	8413	6682	7322	7266	8542	6739	4162	5322	6457	3559	7837	4681	3801
L1ME3	3437	3712	2916	4113	3387	3692	4210	4622	4324	5029	3791	4491	6586	5861	2653	2905	5741	5055	4803	6043	4836	5449	3240	4650	5205	5472	4883	5474	3951	5256	3975	5134	5501	5857	3068	4244	10561	9837	7816	14029	8097	8092	7709	9077	6530	3190	4401	5899	4757
MSTC-int	77	32	52	103	106	156	94	107	81	111	129	192	586	16	18	122	161	385	171	20	189	207	126	154	335	1149	224	1362	144	229	146	334	130	6	66	81	557	274	503	796	407	1456	143	2043	2736	402	55	1083	303
L1PBa1	183	261	230	424	384	454	548	529	397	553	354	479	474	302	441	218	612	371	481	654	712	577	242	667	376	378	393	315	276	328	293	569	1882	683	473	940	1109	1202	362	362	681	723	910	610	918	297	1366	322	326
LTR43-int	0	3	3	15	3	4	1	14	26	18	22	18	2	0	3	0	259	95	65	3	29	163	64	68	0	1	0	0	0	0	18	0	2	127	86	41	107	1	0	0	38	0	0	0	29	0	0	0	0
LTR7C	740	669	686	2298	2399	1933	3398	3413	3155	4411	2076	2555	4574	4936	2255	2002	2695	2700	2534	2822	3119	2933	2093	3603	773	1365	1091	722	796	1011	773	1035	1790	1828	1051	1343	4362	4065	3533	3141	3044	2864	2372	3456	3219	779	562	2098	1467
tRNA-Ala-GCY	6	3	3	0	2	2	1	2	0	8	0	1	0	0	0	0	0	0	0	0	0	0	15	0	0	0	0	0	0	0	0	0	0	18	0	5	0	3	0	7	0	0	0	0	6	0	6	0	0
L1MA5A	520	654	468	870	557	341	649	899	859	1034	842	1004	2451	327	352	283	879	301	996	1162	894	1226	659	1032	966	995	496	1136	227	379	196	378	1510	1412	975	1751	2695	1261	774	1046	820	791	810	799	1056	251	7163	517	599
LTR5_Hs	283	199	294	255	289	289	691	986	1252	1223	285	372	808	488	270	425	988	452	1052	649	509	630	358	326	9481	7064	7709	7180	4688	5552	6264	7888	4808	5924	3659	3704	17426	12873	15521	25239	11030	10437	12509	17299	29278	16033	1367	43612	24151
MER5A	23219	19450	15349	19441	16594	23595	29089	30070	23864	29461	27430	33610	40409	38022	22349	24625	31361	31166	28692	36399	35061	37530	25309	36554	8377	8935	6447	9235	4962	6951	5912	9434	26995	24317	14002	16100	23147	21738	12391	20442	18599	18912	13858	16850	10258	4348	8732	7812	5716
REP522	354	414	388	81	85	133	167	161	109	105	98	45	222	38	24	55	418	265	319	218	208	292	91	121	1698	1393	2083	1695	1561	2036	1363	2246	1451	1030	788	584	1753	2454	1662	4101	1119	495	2538	2192	1838	716	1979	1551	866
AmnSINE1	4675	4066	3158	2468	2190	2553	3897	3778	2765	3332	2814	3993	5174	4866	2792	3432	5388	6248	4036	5544	4757	5048	3868	5408	1997	1890	1288	2456	1383	2036	1161	2450	3182	2897	1778	2095	4650	4645	2727	4574	3825	3284	2536	3616	2593	986	1594	1742	1803
X7D_LINE	0	0	2	9	2	0	0	4	0	0	2	0	0	0	0	0	7	0	0	0	0	0	0	0	0	0	0	0	0	0	0	0	0	0	0	9	0	2	0	0	0	0	10	0	0	0	0	0	0
AmnSINE2	783	767	703	1163	969	1225	1888	1924	1588	1624	1842	2307	2703	1880	1445	2379	1386	2130	1885	2850	2121	2024	1555	2031	1370	689	579	1350	1400	1257	867	1197	626	493	255	152	715	641	776	1032	929	756	734	1414	301	302	269	481	495
tRNA-Glu-GAA	4	3	1	1	4	8	3	0	5	0	4	1	0	0	0	0	29	30	0	0	6	0	5	0	13	16	9	35	0	6	1	13	50	15	0	39	2	80	22	0	60	0	17	23	24	0	0	0	1
MSTB-int	73	80	50	109	129	124	159	131	128	155	160	146	46	339	170	191	294	555	497	486	223	499	308	367	20	111	65	141	230	20	17	66	596	790	281	690	457	863	621	207	371	46	49	496	527	42	471	89	149
MLT1L-int	162	146	86	545	528	666	1117	1154	823	1215	838	916	1933	364	198	493	519	1529	837	1025	1160	1559	842	720	24	113	78	32	0	96	1	210	884	1293	565	706	148	23	0	480	303	83	1	0	0	0	0	0	0
L1PA3	1314	1477	1587	1542	1827	1863	3691	4173	3660	4044	4167	5037	4710	4759	2739	2552	7208	2962	4719	3438	2776	3788	2157	3090	2405	1661	1780	1755	1054	1418	1117	1659	10050	4467	3230	6212	4297	3741	1584	2813	2720	2697	2171	1433	5315	1024	18382	3230	1323
MamRep1894	1164	1131	1047	1661	1562	1922	3206	2891	2339	3248	2453	3631	5007	4524	3345	3150	3364	2735	2958	3055	3211	3983	2814	4397	243	320	177	170	136	105	168	287	1919	1367	871	994	798	1448	664	688	673	1085	419	307	121	122	295	199	112
MER57E2	2	0	2	1	1	2	1	5	1	3	1	5	0	0	6	0	40	0	6	0	0	31	0	10	37	7	13	2	1	2	0	0	42	0	18	0	104	2	93	0	0	0	0	141	9	0	0	25	0
MER99	76	78	37	39	51	52	46	85	94	88	50	49	27	0	1	0	303	75	62	153	62	124	136	88	5	2	3	13	13	11	6	3	39	164	10	39	162	43	71	26	84	3	78	90	12	1	207	26	25
LTR7A	451	546	592	1092	1584	1303	2491	2551	2011	2639	1050	1369	942	675	582	612	1320	921	1282	1090	1315	1383	1085	1577	457	632	752	672	654	615	596	934	1930	1793	1207	1435	1746	1329	927	1360	1191	1662	1018	1202	2443	752	338	2021	1070
MLT1O-int	0	0	1	4	0	2	0	0	2	0	0	1	0	0	0	0	0	0	0	0	0	0	0	0	0	0	0	0	0	0	0	0	0	0	0	0	0	0	0	0	0	0	0	0	0	0	0	0	0
MLT1H	22587	18209	13802	8061	6914	8443	11955	12219	9254	11975	9124	10519	17722	12228	9808	9403	16736	13482	12418	15599	14326	16635	11203	15618	2556	3735	2562	2629	2273	2196	1466	3065	10881	7141	5916	5950	11362	10915	6264	9996	7376	11294	5535	8218	4033	1566	7032	3785	1722
[truncated: 75 more columns]
